# Supplementary material for: UPR-Induced miR-616 Inhibits Human Breast Cancer Cell Growth and Migration by Targeting c-MYC
Source: MDPI journal article supplement (doi:10.3390/ijms241713034), 2023-08-22
Supplement: s1 [file s1]

**Supplementary Table S2.** List of primers and probes used for PCR.

TaqMan qPCR assays (IDT)

| Primer         | Direction | 5'to3' primer sequence                                        |
|----------------|-----------|---------------------------------------------------------------|
| <b>SUSD3</b>   | Probe     | 5' /56-FAM/ACC ACA GCT /ZEN/TCA CC CAG ACC AT/3IABkFQ/3'      |
|                | Primer 1  | 5' -CCT CAA GCA CTT CAA CAA ACC-3'                            |
|                | Primer 2  | 5' -GAT CCC AGG GTC CTT GTC-3'                                |
| <b>GALNT14</b> | Probe     | 5' /56-FAM/CCC CAG TG /ZEN/TTC TTG TCC TTT GCA /3IABkFQ/3'    |
|                | Primer 1  | 5' -GAG CTG TGC CTG TCA GTC-3'                                |
|                | Primer 2  | 5' -ATG CTA TGT GCT CGA TGT GG-3'                             |
| <b>BCL2</b>    | Probe     | 5' /56-FAM/AAC AAA TGC /ZEN/ATA AGG CAA CGA C/3IABkFQ/3'      |
|                | Primer 1  | 5' GCT ATA ACT GGA GAG TGC TGA AG3'                           |
|                | Primer 2  | 5' AGT CTA CTT CCT CTG TGA TGT TG3'                           |
| <b>VAV1</b>    | Probe     | 5' /56-FAM/CCA TAG ATC /ZEN/TCC CCT CGC CAC CA/3IABkFQ/3'     |
|                | Primer 1  | 5' GTG ACA TCA TCA AGA TCC TTA ACA AG3'                       |
|                | Primer 2  | 5' CAG AAT AAT CTT CCT CCA CGT AGT3'                          |
| <b>MYC</b>     | Probe     | 5' /56-FAM/TGG GCG GTG /ZEN/TCT CCT CAT GG/3IABkFQ/3'         |
|                | Primer 1  | 5' TCC TCG GAT TCT CTG CTC TC3'                               |
|                | Primer 2  | 5' TCT TCC TCA TCT TCT TGT TCC TC3'                           |
| <b>GAPDH</b>   | Probe     | 5' -/56FAM/CAG CAA GAG/ZEN/CAC AAG AGA GAG AGA/3IABkFQ/-3'    |
|                | Primer 1  | 5' -AGG GTG GTG GAC CTC AT-3'                                 |
|                | Primer 2  | 5' -TGA GTG TGG CAG GGA CT-3'                                 |
| <b>RPLP0</b>   | Probe     | 5' -/56-FAM/CCA GGA CTC/ZEN/GTT TGT ACC CGT TGA T/3IABkFQ/-3' |
|                | Primer 1  | 5' -GGT GTA ATC CGT CTC CAC AG-3'                             |
|                | Primer 2  | 5' -GAA ACT CTG CAT TCT CGC TTC-3'                            |
| <b>PERK</b>    | Probe     | 5' -/56-FAM/TTT CTT GAT/ZEN/GGA GAG AGC GGG CTG G/3IABkFQ/-3' |
|                | Primer 1  | 5' -AGG ACT TGC CTA TGG AAA CC-3'                             |
|                | Primer 2  | 5' -CTG TTG CTC CAA GGT GTG AT-3'                             |
| <b>ATF6</b>    | Probe     | 5' -/56FAM/AGG ACT G/ZEN/AGG ATA GCA AGA TGA GAA/3IABkFQ/-3'  |
|                | Primer 1  | 5' -AAC TTT AGT CGG CCT GAT GG-3'                             |
|                | Primer 2  | 5' -GAA TCA AAG CAA AAG CCT GTC C-3'                          |

Primers used for conventional PCR

| Primer Name  | Sequence of Primer                         | Product Size                   |
|--------------|--------------------------------------------|--------------------------------|
| <b>GAPDH</b> | Forward: 5' -ACC ACA GTC CAT GCC ATC - 3'  | 452 bp                         |
|              | Reverse: 5' -TCC ACC ACC CTG TTC CTG- 3'   |                                |
| <b>XBP1s</b> | Forward: 5' -GGG AAT GAA GTG AGG CCA G- 3' | XBP1u: 137 bp<br>XBP1s: 111 bp |
|              | Reverse: 5' -TGA AGA GTC AAT ACC GCC A- 3' |                                |

| <b>miRNA<br/>Assay Name</b> | <b>Mature miRNA sequence</b>                                                                                          | <b>Assay ID</b> | <b>MirBase ID and<br/>accession no.</b> |
|-----------------------------|-----------------------------------------------------------------------------------------------------------------------|-----------------|-----------------------------------------|
| U6 SnRNA                    | GTGCTCGCTTCGGCAGCACATATACTAAAATTGG<br>AACGATACAGAGAAGATTAGCATGGCCCCTGCGC<br>AAGGATGACACGCAAATTCGTGAAGCGTTCATA<br>TTTT | 001973          |                                         |
| hsa-miR-616-5p              | ACUCAAAACCCUUCAGUGACUU                                                                                                | 001589          | hsa-miR-616-5p<br>MIMAT0003284          |
| hsa-miR-616-3p              | AGUCAUUGGAGGGUUUGAGCAG                                                                                                | 002414          | hsa-miR-616-3p<br>MIMAT0004805          |
| Primary hsa-<br>miR-616     | UUAGGUAAUCCUCCACUAAAAACCCUUCAGUGA<br>CUUCCAUGACAUGAAAUAGGAAGUCAUUGGAGGG<br>UUUGAGCAGAGGAAUGACCUGUUUUAAAA              | Hs03304633_pri  | MI0003629                               |

TaqMan qPCR assays for microRNAs (Applied Biosystem)
