# Supplementary material for: UPR-Induced miR-616 Inhibits Human Breast Cancer Cell Growth and Migration by Targeting c-MYC
Source: Int J Mol Sci. 2023 Aug 22;24(17):13034. doi: 10.3390/ijms241713034 (PMC10487498; doi:10.3390/ijms241713034)
Supplement: Supplementary file 1 [file ijms-24-13034-s001.zip]

Archive with 4 entries (4 files):
- Supplementary Figures MIR616 IJMS-23 SG edit.pptx
- Supplementary methods miR-616  IJMS.pdf
- Supplementary Table S1. MCF7 Control vs miR-616 DEGs.xls
- Supplementary Table S2 mir616 IJMS.pdf
