# Supplementary material for: UPR-Induced miR-616 Inhibits Human Breast Cancer Cell Growth and Migration by Targeting c-MYC
Source: Int J Mol Sci. 2023 Aug 22;24(17):13034. doi: 10.3390/ijms241713034 (PMC10487498; doi:10.3390/ijms241713034)
Supplement: Supplementary file 1 [file ijms-24-13034-s001.zip › Supplementary Table S1. MCF7 Control vs miR-616 DEGs.xls]

## Sheet: MCF7_miR-CTRL-VS-MCF7_miR-C.Gen
GeneID	geneLength	Means-MCF7_miR-CTRL	Means-MCF7_miR-C	log2Ratio(MCF7_miR-C/MCF7_miR-CTRL)	Up-Down-Regulation(MCF7_miR-C/MCF7_miR-CTRL)	Probability	Symbol	Description	KEGG Orthology	GO Component	GO Function	GO Process	Blast nr
100616345	63	22.545	0.01	-11.1386	Down	1	MIR4426	1	-	-	-	-	-
100500864	55	2.07	0.01	-7.69349	Down	1	MIR3929	1	-	-	-	-	-
102465435	65	1.83	0.01	-7.5157	Down	0.999791	MIR6727	1	-	-	-	-	-
26798	70	1.545	0.01	-7.27146	Down	1	SNORD51	1	-	-	-	-	-
26817	66	1.31	0.01	-7.03342	Down	1	SNORD34	1	-	-	-	-	-
94163	69	1.2	0.01	-6.90689	Down	0.999995	SNORD38B	1	-	-	-	-	-
102466749	69	1.17	0.01	-6.87036	Down	0.999992	MIR6849	1	-	-	-	-	-
100616167	60	1.0975	0.01	-6.77808	Down	1	MIR4722	1	-	-	-	-	-
6279	450	20.8225	0.23	-6.50037	Down	0.999999	S100A8	4	K17274|1|9e-07|55.1|ola:101155699|calpactin-1 light chain;K14734|3|4e-06|52.8|shr:105749983|S100 calcium binding protein G	GO:0044421;GO:0043232;GO:0016020//membrane;GO:0044421;GO:0043232;GO:0016020//membrane;GO:0044421;GO:0043232;GO:0016020//membrane;GO:0044421;GO:0043232;GO:0016020//membrane;GO:0044421;GO:0043232;GO:0016020//membrane	GO:0046872//metal ion binding;GO:0046872//metal ion binding;GO:0046872//metal ion binding;GO:0046872//metal ion binding;GO:0046872//metal ion binding	GO:0006954//inflammatory response;GO:0002237//response to molecule of bacterial origin;GO:0010038//response to metal ion;GO:0006954//inflammatory response;GO:0002237//response to molecule of bacterial origin;GO:0010038//response to metal ion;GO:0006954//inflammatory response;GO:0002237//response to molecule of bacterial origin;GO:0010038//response to metal ion;GO:0006954//inflammatory response;GO…	gi|426331617|ref|XP_004026775.1|/4.6496e-64/PREDICTED: protein S100-A8 [Gorilla gorilla gorilla]
3934	863	16.7325	0.21	-6.31612	Down	1	LCN2	4	K01830|1|7e-24|113|amj:102565053|prostaglandin-H2 D-isomerase [EC:5.3.99.2]	GO:0044444//cytoplasmic part;GO:0044421	GO:0046914//transition metal ion binding;GO:0042802//identical protein binding;GO:0019899//enzyme binding	GO:0034614//cellular response to reactive oxygen species;GO:0006952//defense response;GO:0015688//iron chelate transport;GO:0006915//apoptotic process;GO:0030030//cell projection organization;GO:0031667//response to nutrient levels;GO:0051260//protein homooligomerization;GO:0034612//response to tumor necrosis factor;GO:0070555//response to interleukin-1;GO:0010467//gene expression;GO:0032496//res…	gi|119608154|gb|EAW87748.1|/7.21015e-106/lipocalin 2 (oncogene 24p3), isoform CRA_a [Homo sapiens]
3576	1718	2.89	0.04	-6.17493	Down	1	CXCL8	3	K10030|1|1e-39|167|pon:100437111|interleukin 8	GO:0044421	GO:0005125//cytokine activity;GO:0045236//CXCR chemokine receptor binding	GO:0006952//defense response;GO:0048565//digestive tract development;GO:0022402//cell cycle process;GO:0048646//anatomical structure formation involved in morphogenesis;GO:0019932//second-messenger-mediated signaling;GO:0050927//positive regulation of positive chemotaxis;GO:0002690//positive regulation of leukocyte chemotaxis;GO:0007155//cell adhesion;GO:0045069//regulation of viral genome replic…	gi|10834978|ref|NP_000575.1|/9.63139e-39/interleukin-8 precursor [Homo sapiens]
6278	450	18.925	0.325	-5.86371	Down	1	S100A7	3	-	GO:0043231//intracellular membrane-bounded organelle;GO:0005924//cell-substrate adherens junction;GO:0044444//cytoplasmic part	GO:0046914//transition metal ion binding;GO:0005102//receptor binding	GO:0043410//positive regulation of MAPK cascade;GO:0002690//positive regulation of leukocyte chemotaxis;GO:0042742//defense response to bacterium;GO:0009913//epidermal cell differentiation;GO:0051235;GO:0002548//monocyte chemotaxis;GO:0048646//anatomical structure formation involved in morphogenesis;GO:0002237//response to molecule of bacterial origin;GO:0006979//response to oxidative stress	gi|635104816|ref|XP_007975277.1|/1.8089e-52/PREDICTED: protein S100-A7 [Chlorocebus sabaeus]
10537	1006	2.02	0.0475	-5.41028	Down	0.999412	UBD	3	K12157|1|2e-89|331|hsa:10537|ubiquitin D	GO:0043231//intracellular membrane-bounded organelle;GO:0016234//inclusion body	GO:0032403//protein complex binding	GO:0006915//apoptotic process;GO:0032446//protein modification by small protein conjugation;GO:0019941//modification-dependent protein catabolic process;GO:0001773//myeloid dendritic cell activation;GO:0034097//response to cytokine;GO:0000236;GO:0007249//I-kappaB kinase/NF-kappaB signaling;GO:0070841	gi|222352096|ref|NP_006389.2|/1.77478e-88/ubiquitin D [Homo sapiens]
6280	586	76.5825	2.0475	-5.22508	Down	1	S100A9	3	K17274|1|8e-10|65.5|ola:101155699|calpactin-1 light chain;K10384|2|2e-08|61.2|hsa:388698|filaggrin	GO:0043232;GO:0016020//membrane;GO:0031981//nuclear lumen	GO:0060089;GO:0046872//metal ion binding	GO:0006952//defense response;GO:0042221//response to chemical;GO:0023052//signaling;GO:0007154//cell communication	gi|4506773|ref|NP_002956.1|/1.02375e-61/protein S100-A9 [Homo sapiens]
629	2646	6.575	0.225	-4.86899	Down	0.99945	CFB	5	K01335|1|0.0|1561|hsa:629|component factor B [EC:3.4.21.47]	GO:0016020//membrane	GO:0004175//endopeptidase activity;GO:0005515//protein binding	GO:0006952//defense response;GO:0006956//complement activation	gi|67782358|ref|NP_001701.2|/0/complement factor B preproprotein [Homo sapiens]
6288	579	1.6575	0.08	-4.37287	Down	0.997503	SAA1	5	K17310|1|2e-69|263|pon:100446128|serum amyloid A protein	GO:0034358//plasma lipoprotein particle;GO:0034358//plasma lipoprotein particle;GO:0034358//plasma lipoprotein particle	GO:0005102//receptor binding;GO:0005102//receptor binding;GO:0005102//receptor binding	GO:0030155//regulation of cell adhesion;GO:0001775//cell activation;GO:0031348//negative regulation of defense response;GO:0002526//acute inflammatory response;GO:0050707//regulation of cytokine secretion;GO:0032732//positive regulation of interleukin-1 production;GO:0030595//leukocyte chemotaxis;GO:0051480//regulation of cytosolic calcium ion concentration;GO:0030155//regulation of cell adhesion…	gi|40316910|ref|NP_954630.1|/1.71086e-66/serum amyloid A-1 protein preproprotein [Homo sapiens]
4939	3395.59	9.9175	0.4925	-4.33178	Down	0.996705	OAS2	1	K14216|1|8e-81|304|hsa:4939|2'-5'-oligoadenylate synthetase [EC:2.7.7.84]	GO:0043231//intracellular membrane-bounded organelle;GO:0043231//intracellular membrane-bounded organelle;GO:0043231//intracellular membrane-bounded organelle	GO:0003676//nucleic acid binding;GO:0032559//adenyl ribonucleotide binding;GO:0016772//transferase activity, transferring phosphorus-containing groups;GO:0003676//nucleic acid binding;GO:0032559//adenyl ribonucleotide binding;GO:0016772//transferase activity, transferring phosphorus-containing groups;GO:0003676//nucleic acid binding;GO:0032559//adenyl ribonucleotide binding;GO:0016772//transferas…	GO:0019221//cytokine-mediated signaling pathway;GO:0002376//immune system process;GO:0034641;GO:0019221//cytokine-mediated signaling pathway;GO:0002376//immune system process;GO:0034641;GO:0019221//cytokine-mediated signaling pathway;GO:0002376//immune system process;GO:0034641	gi|119618432|gb|EAW98026.1|/0/2'-5'-oligoadenylate synthetase 2, 69/71kDa, isoform CRA_a [Homo sapiens]
3429	659.52	14.1625	0.705	-4.32831	Down	1	IFI27	4	-	GO:0044464;GO:0044464;GO:0044464;GO:0044464;GO:0044464;GO:0044464	-	GO:0043065//positive regulation of apoptotic process;GO:0043065//positive regulation of apoptotic process;GO:0050794//regulation of cellular process;GO:0043065//positive regulation of apoptotic process;GO:0043065//positive regulation of apoptotic process;GO:0043065//positive regulation of apoptotic process;GO:0050794//regulation of cellular process;GO:0043065//positive regulation of apoptotic pro…	gi|795228490|ref|XP_011806935.1|/7.37044e-49/PREDICTED: interferon alpha-inducible protein 27, mitochondrial isoform X1 [Colobus angolensis palliatus]
100500833	110	3.435	0.19	-4.17624	Down	0.998897	MIR3653	1	-	-	-	-	-
27189	1048	1.1875	0.0675	-4.1369	Down	0.998516	IL17C	3	K05491|1|7e-96|352|hsa:27189|interleukin 17C	GO:0044421	GO:0005102//receptor binding	GO:0006952//defense response;GO:0007165//signal transduction;GO:0030851//granulocyte differentiation;GO:0007154//cell communication	gi|7019435|ref|NP_037410.1|/6.09499e-95/interleukin-17C precursor [Homo sapiens]
684	1048	9.6725	0.7275	-3.73287	Down	0.999992	BST2	3	K06731|1|3e-63|244|hsa:684|bone marrow stromal cell antigen 2	GO:0016021//integral component of membrane;GO:0005768//endosome	GO:0060089;GO:0042802//identical protein binding	GO:0006952//defense response;GO:0006955//immune response;GO:0046649//lymphocyte activation;GO:0032501//multicellular organismal process;GO:0007249//I-kappaB kinase/NF-kappaB signaling;GO:0002252;GO:0007154//cell communication	gi|4757876|ref|NP_004326.1|/2.33768e-62/bone marrow stromal antigen 2 precursor [Homo sapiens]
100505869	1085	1.98	0.1575	-3.65208	Down	0.999656	CFAP58-AS1	1	-	-	-	-	gi|2072958|gb|AAC51267.1|/1.75384e-07/putative p150 [Homo sapiens]
718	5148	2.7475	0.22	-3.64254	Down	0.997378	C3	3	K03990|1|0.0|3274|hsa:718|complement component 3	-	-	-	gi|115298678|ref|NP_000055.2|/0/complement C3 preproprotein [Homo sapiens]
7052	4964	3.01	0.2525	-3.57541	Down	0.999531	TGM2	1	K05625|1|0.0|1088|pps:100994169|transglutaminase 2 [EC:2.3.2.13]	-	GO:0043169//cation binding;GO:0016755//transferase activity, transferring amino-acyl groups;GO:0016747//transferase activity, transferring acyl groups other than amino-acyl groups;GO:0043169//cation binding;GO:0016755//transferase activity, transferring amino-acyl groups;GO:0016747//transferase activity, transferring acyl groups other than amino-acyl groups;GO:0043169//cation binding;GO:0016755//…	GO:0030155//regulation of cell adhesion;GO:0006909//phagocytosis;GO:0060605;GO:0061138//morphogenesis of a branching epithelium;GO:0006464//cellular protein modification process;GO:0030155//regulation of cell adhesion;GO:0006909//phagocytosis;GO:0060605;GO:0061138//morphogenesis of a branching epithelium;GO:0006464//cellular protein modification process;GO:0030155//regulation of cell adhesion;GO:…	gi|39777597|ref|NP_004604.2|/0/protein-glutamine gamma-glutamyltransferase 2 isoform a [Homo sapiens]
101954275	107	44.285	3.7225	-3.57247	Down	1	RNU6-7	1	K05692|1|4e-10|65.1|pps:103784606|actin beta/gamma 1	-	-	-	gi|537152882|gb|ERE72362.1|/5.27797e-12/membralin-like protein [Cricetulus griseus]
101954278	107	44.285	3.7225	-3.57247	Down	1	RNU6-8	1	K05692|1|4e-10|65.1|pps:103784606|actin beta/gamma 1	-	-	-	gi|537152882|gb|ERE72362.1|/5.27797e-12/membralin-like protein [Cricetulus griseus]
4599	3444	6.43	0.5425	-3.56712	Down	0.999989	MX1	1	K14754|1|0.0|832|hsa:4599|interferon-induced GTP-binding protein Mx1	GO:0044444//cytoplasmic part;GO:0044444//cytoplasmic part;GO:0044444//cytoplasmic part;GO:0044444//cytoplasmic part	GO:0017111//nucleoside-triphosphatase activity;GO:0032561//guanyl ribonucleotide binding;GO:0017111//nucleoside-triphosphatase activity;GO:0032561//guanyl ribonucleotide binding;GO:0017111//nucleoside-triphosphatase activity;GO:0032561//guanyl ribonucleotide binding;GO:0017111//nucleoside-triphosphatase activity;GO:0032561//guanyl ribonucleotide binding	GO:0012502//induction of programmed cell death;GO:0051707//response to other organism;GO:0019221//cytokine-mediated signaling pathway;GO:0009207;GO:0006950//response to stress;GO:0012502//induction of programmed cell death;GO:0051707//response to other organism;GO:0019221//cytokine-mediated signaling pathway;GO:0009207;GO:0006950//response to stress;GO:0012502//induction of programmed cell death;…	gi|222136617|ref|NP_002453.2|/0/interferon-induced GTP-binding protein Mx1 isoform a [Homo sapiens]
693206	96	2.255	0.195	-3.53158	Down	0.992257	MIR621	1	-	-	-	-	-
3248	2774	2.755	0.2725	-3.33772	Down	0.999999	HPGD	1	K00069|1|5e-89|332|pon:100172788|15-hydroxyprostaglandin dehydrogenase (NAD) [EC:1.1.1.141]	GO:0031981//nuclear lumen;GO:0044444//cytoplasmic part;GO:0031981//nuclear lumen;GO:0044444//cytoplasmic part;GO:0031981//nuclear lumen;GO:0044444//cytoplasmic part;GO:0031981//nuclear lumen;GO:0044444//cytoplasmic part;GO:0031981//nuclear lumen;GO:0044444//cytoplasmic part	GO:0051287//NAD binding;GO:0016616//oxidoreductase activity, acting on the CH-OH group of donors, NAD or NADP as acceptor;GO:0042802//identical protein binding;GO:0004955//prostaglandin receptor activity;GO:0051287//NAD binding;GO:0016616//oxidoreductase activity, acting on the CH-OH group of donors, NAD or NADP as acceptor;GO:0042802//identical protein binding;GO:0004955//prostaglandin receptor …	GO:0000038//very long-chain fatty acid metabolic process;GO:0051726//regulation of cell cycle;GO:0006692;GO:0022414//reproductive process;GO:0007178//transmembrane receptor protein serine/threonine kinase signaling pathway;GO:0000038//very long-chain fatty acid metabolic process;GO:0051726//regulation of cell cycle;GO:0006692;GO:0022414//reproductive process;GO:0007178//transmembrane receptor pro…	gi|31542939|ref|NP_000851.2|/3.30416e-139/15-hydroxyprostaglandin dehydrogenase [NAD(+)] isoform 1 [Homo sapiens]
2537	836	83.9875	8.81	-3.25296	Down	0.996986	IFI6	2	-	GO:0031224//intrinsic component of membrane;GO:0043231//intracellular membrane-bounded organelle;GO:0031224//intrinsic component of membrane;GO:0043231//intracellular membrane-bounded organelle;GO:0031224//intrinsic component of membrane;GO:0043231//intracellular membrane-bounded organelle	GO:0005488//binding;GO:0005488//binding;GO:0005488//binding	GO:0019221//cytokine-mediated signaling pathway;GO:0008637//apoptotic mitochondrial changes;GO:0002376//immune system process;GO:0010466//negative regulation of peptidase activity;GO:0043066//negative regulation of apoptotic process;GO:0032845;GO:0019221//cytokine-mediated signaling pathway;GO:0008637//apoptotic mitochondrial changes;GO:0002376//immune system process;GO:0010466//negative regulati…	gi|817339403|ref|XP_012295658.1|/2.72011e-66/PREDICTED: interferon alpha-inducible protein 6 isoform X1 [Aotus nancymaae]
3434	4396	6.6375	0.705	-3.23494	Down	1	IFIT1	4	K14217|1|0.0|906|hsa:3434|interferon-induced protein with tetratricopeptide repeats 1	GO:0044424;GO:0044424;GO:0044424;GO:0044424;GO:0044424	GO:0005515//protein binding;GO:0005515//protein binding;GO:0005515//protein binding;GO:0005515//protein binding;GO:0005515//protein binding	GO:0051095;GO:0043393//regulation of protein binding;GO:0034340//response to type I interferon;GO:0050687//negative regulation of defense response to virus;GO:0019221//cytokine-mediated signaling pathway;GO:0045069//regulation of viral genome replication;GO:0043330//response to exogenous dsRNA;GO:0051095;GO:0043393//regulation of protein binding;GO:0034340//response to type I interferon;GO:005068…	gi|400286379|ref|NP_001257856.1|/0/interferon-induced protein with tetratricopeptide repeats 1 isoform 2 [Homo sapiens]
101927523	1014	1.6625	0.1775	-3.22746	Down	0.99936	LOC101927523	1	-	-	-	-	gi|119569977|gb|EAW49592.1|/1.89583e-29/hCG2038789, partial [Homo sapiens]
10468	1834	1.3175	0.145	-3.18368	Down	1	FST	2	K04661|1|0.0|686|ptr:461879|follistatin	-	GO:0060089;GO:0032403//protein complex binding;GO:0043394//proteoglycan binding;GO:0060089;GO:0032403//protein complex binding;GO:0043394//proteoglycan binding	GO:0030097//hemopoiesis;GO:0032277//negative regulation of gonadotropin secretion;GO:0006357//regulation of transcription from RNA polymerase II promoter;GO:0045684//positive regulation of epidermis development;GO:0008283//cell proliferation;GO:0042476//odontogenesis;GO:0008406//gonad development;GO:0001942//hair follicle development;GO:0019953//sexual reproduction;GO:0045595//regulation of cell …	gi|7242222|ref|NP_037541.1|/0/follistatin isoform FST344 precursor [Homo sapiens]
84419	839	9.8725	1.1575	-3.0924	Down	0.997522	C15orf48	2	-	GO:0043231//intracellular membrane-bounded organelle;GO:0043231//intracellular membrane-bounded organelle	-	-	gi|14165280|ref|NP_115789.1|/6.28556e-40/normal mucosa of esophagus-specific gene 1 protein [Homo sapiens]
111	5546.87	2.9375	0.3825	-2.94106	Down	0.999476	ADCY5	1	K08045|1|0.0|1746|ggo:101150181|adenylate cyclase 5 [EC:4.6.1.1]	GO:0031224//intrinsic component of membrane;GO:0031224//intrinsic component of membrane	GO:0032559//adenyl ribonucleotide binding;GO:0043169//cation binding;GO:0009975//cyclase activity;GO:0032559//adenyl ribonucleotide binding;GO:0043169//cation binding;GO:0009975//cyclase activity	GO:0035588;GO:0015980//energy derivation by oxidation of organic compounds;GO:0007267//cell-cell signaling;GO:0007193//adenylate cyclase-inhibiting G-protein coupled receptor signaling pathway;GO:0033762//response to glucagon;GO:0032147//activation of protein kinase activity;GO:0010863//positive regulation of phospholipase C activity;GO:0007610//behavior;GO:0007169//transmembrane receptor protein…	gi|34486092|ref|NP_899200.1|/0/adenylate cyclase type 5 isoform 1 [Homo sapiens]
8638	2103	2.25	0.315	-2.8365	Down	1	OASL	1	K14608|1|7e-124|446|hsa:8638|2'-5'-oligoadenylate synthase-like protein	GO:0031981//nuclear lumen;GO:0031981//nuclear lumen;GO:0031981//nuclear lumen	GO:0003723//RNA binding;GO:0008134//transcription factor binding;GO:0003824//catalytic activity;GO:0032559//adenyl ribonucleotide binding;GO:0003723//RNA binding;GO:0008134//transcription factor binding;GO:0003824//catalytic activity;GO:0032559//adenyl ribonucleotide binding;GO:0003723//RNA binding;GO:0008134//transcription factor binding;GO:0003824//catalytic activity;GO:0032559//adenyl ribonucl…	GO:0019221//cytokine-mediated signaling pathway;GO:0002376//immune system process;GO:0019221//cytokine-mediated signaling pathway;GO:0002376//immune system process;GO:0019221//cytokine-mediated signaling pathway;GO:0002376//immune system process	gi|387849330|ref|NP_001248754.1|/0/2'-5'-oligoadenylate synthase-like protein isoform c [Homo sapiens]
2637	1795	2.9275	0.4425	-2.72592	Down	0.998737	GBX2	1	K09321|1|1e-152|303|hsa:2637|homeobox protein GBX	GO:0043231//intracellular membrane-bounded organelle;GO:0043231//intracellular membrane-bounded organelle	GO:0001071//nucleic acid binding transcription factor activity;GO:0003677//DNA binding;GO:0001071//nucleic acid binding transcription factor activity;GO:0003677//DNA binding	GO:0001525//angiogenesis;GO:0006351//transcription, DNA-templated;GO:0030917//midbrain-hindbrain boundary development;GO:0001667//ameboidal-type cell migration;GO:0021924//cell proliferation in external granule layer;GO:0021546//rhombomere development;GO:0006935//chemotaxis;GO:0042471//ear morphogenesis;GO:0022037//metencephalon development;GO:0001525//angiogenesis;GO:0006351//transcription, DNA-…	gi|45593144|ref|NP_001476.2|/1.37453e-160/homeobox protein GBX-2 isoform 1 [Homo sapiens]
9246	1332.49	8.2125	1.2575	-2.70726	Down	0.999998	UBE2L6	4	K04553|1|5e-86|320|pps:100967273|ubiquitin-conjugating enzyme E2 L6 [EC:2.3.2.23]	GO:0044444//cytoplasmic part;GO:0044444//cytoplasmic part	GO:0005488//binding;GO:0019787//ubiquitin-like protein transferase activity;GO:0005488//binding;GO:0019787//ubiquitin-like protein transferase activity	GO:0001818//negative regulation of cytokine production;GO:0032446//protein modification by small protein conjugation;GO:0001818//negative regulation of cytokine production;GO:0032446//protein modification by small protein conjugation	gi|4759282|ref|NP_004214.1|/4.56426e-85/ubiquitin/ISG15-conjugating enzyme E2 L6 isoform 1 [Homo sapiens]
692111	86	1.8075	0.2775	-2.70344	Down	0.989486	SNORD71	1	-	-	-	-	-
330	6932	1.2475	0.1975	-2.65912	Down	0.989326	BIRC3	4	K16060|1|0.0|1119|hsa:330|baculoviral IAP repeat-containing protein 2/3	GO:0032991//macromolecular complex;GO:0043231//intracellular membrane-bounded organelle;GO:0044425;GO:0032991//macromolecular complex;GO:0043231//intracellular membrane-bounded organelle;GO:0044425	GO:0046914//transition metal ion binding;GO:0019787//ubiquitin-like protein transferase activity;GO:0046914//transition metal ion binding;GO:0019787//ubiquitin-like protein transferase activity	GO:0051259//protein oligomerization;GO:0032446//protein modification by small protein conjugation;GO:0048232//male gamete generation;GO:0007165//signal transduction;GO:0043066//negative regulation of apoptotic process;GO:0051259//protein oligomerization;GO:0032446//protein modification by small protein conjugation;GO:0048232//male gamete generation;GO:0007165//signal transduction;GO:0043066//nega…	gi|4502139|ref|NP_001156.1|/0/baculoviral IAP repeat-containing protein 3 [Homo sapiens]
102723471	1518	1.025	0.1625	-2.65711	Down	1	LOC102723471	1	-	-	-	-	gi|694967424|ref|XP_009430634.1|/1.83937e-14/PREDICTED: uncharacterized protein LOC104002852 isoform X3 [Pan troglodytes]
4938	1830	10.1725	1.6875	-2.59171	Down	1	OAS1	3	K14216|1|0.0|798|hsa:4938|2'-5'-oligoadenylate synthetase [EC:2.7.7.84]	GO:0043231//intracellular membrane-bounded organelle;GO:0043231//intracellular membrane-bounded organelle;GO:0043231//intracellular membrane-bounded organelle;GO:0043231//intracellular membrane-bounded organelle	GO:0003676//nucleic acid binding;GO:0032559//adenyl ribonucleotide binding;GO:0016772//transferase activity, transferring phosphorus-containing groups;GO:0003676//nucleic acid binding;GO:0032559//adenyl ribonucleotide binding;GO:0016772//transferase activity, transferring phosphorus-containing groups;GO:0003676//nucleic acid binding;GO:0032559//adenyl ribonucleotide binding;GO:0016772//transferas…	GO:0019221//cytokine-mediated signaling pathway;GO:0002376//immune system process;GO:0034641;GO:0019221//cytokine-mediated signaling pathway;GO:0002376//immune system process;GO:0034641;GO:0019221//cytokine-mediated signaling pathway;GO:0002376//immune system process;GO:0034641;GO:0019221//cytokine-mediated signaling pathway;GO:0002376//immune system process;GO:0034641	gi|119618429|gb|EAW98023.1|/0/2',5'-oligoadenylate synthetase 1, 40/46kDa, isoform CRA_e [Homo sapiens]
100126321	81	1.285	0.2175	-2.56268	Down	0.996511	MIR922	1	-	-	-	-	-
100113380	96	2.6125	0.4525	-2.52944	Down	0.985341	SNORD125	1	-	-	-	-	-
339479	3137	2.4375	0.4225	-2.52838	Down	1	BRINP3	1	-	GO:0044424	-	GO:0048731//system development;GO:0051726//regulation of cell cycle	gi|39979638|ref|NP_950252.1|/0/BMP/retinoic acid-inducible neural-specific protein 3 isoform 1 precursor [Homo sapiens]
3945	1343.09	46.765	8.2025	-2.51129	Down	1	LDHB	2	K00016|1|0.0|662|nle:100587841|L-lactate dehydrogenase [EC:1.1.1.27]	GO:0043231//intracellular membrane-bounded organelle;GO:0044444//cytoplasmic part;GO:0043231//intracellular membrane-bounded organelle;GO:0044444//cytoplasmic part;GO:0043231//intracellular membrane-bounded organelle;GO:0044444//cytoplasmic part	GO:0004457//lactate dehydrogenase activity;GO:0005515//protein binding;GO:0000166//nucleotide binding;GO:0004457//lactate dehydrogenase activity;GO:0005515//protein binding;GO:0000166//nucleotide binding;GO:0004457//lactate dehydrogenase activity;GO:0005515//protein binding;GO:0000166//nucleotide binding	GO:0006007//glucose catabolic process;GO:0032787//monocarboxylic acid metabolic process;GO:0046496//nicotinamide nucleotide metabolic process;GO:0006007//glucose catabolic process;GO:0032787//monocarboxylic acid metabolic process;GO:0046496//nicotinamide nucleotide metabolic process;GO:0006007//glucose catabolic process;GO:0032787//monocarboxylic acid metabolic process;GO:0046496//nicotinamide nu…	gi|927131538|ref|XP_013843801.1|/0/PREDICTED: L-lactate dehydrogenase B chain [Sus scrofa]
100302185	67	2.51	0.45	-2.47969	Down	0.987744	MIR1204	1	-	-	-	-	-
3433	3505	1.0225	0.185	-2.4665	Down	0.996254	IFIT2	4	K14217|1|2e-100|370|nle:100585530|interferon-induced protein with tetratricopeptide repeats 1	-	GO:0005488//binding	GO:0043393//regulation of protein binding;GO:0019221//cytokine-mediated signaling pathway;GO:0035455//response to interferon-alpha;GO:0051707//response to other organism	gi|34192824|gb|AAH32839.2|/0/Interferon-induced protein with tetratricopeptide repeats 2 [Homo sapiens]
2118	2187	1.025	0.1875	-2.45066	Down	0.999447	ETV4	1	K15592|1|0.0|981|hsa:2118|ets translocation variant 4	GO:0031981//nuclear lumen;GO:0031981//nuclear lumen;GO:0031981//nuclear lumen;GO:0031981//nuclear lumen;GO:0031981//nuclear lumen	GO:0001071//nucleic acid binding transcription factor activity;GO:0003677//DNA binding;GO:0001071//nucleic acid binding transcription factor activity;GO:0003677//DNA binding;GO:0001071//nucleic acid binding transcription factor activity;GO:0003677//DNA binding;GO:0001071//nucleic acid binding transcription factor activity;GO:0003677//DNA binding;GO:0001071//nucleic acid binding transcription fact…	GO:0007411//axon guidance;GO:0060688//regulation of morphogenesis of a branching structure;GO:0033598//mammary gland epithelial cell proliferation;GO:0006351//transcription, DNA-templated;GO:0007411//axon guidance;GO:0060688//regulation of morphogenesis of a branching structure;GO:0033598//mammary gland epithelial cell proliferation;GO:0006351//transcription, DNA-templated;GO:0007411//axon guidan…	gi|602288|gb|AAA95991.1|/0/adenovirus E1A enhancer binding protein, partial [Homo sapiens]
5099	8191.77	1.0725	0.1975	-2.44105	Down	0.999392	PCDH7	1	K16498|1|0.0|2206|ggo:101146837|protocadherin delta 1	GO:0016021//integral component of membrane;GO:0016021//integral component of membrane	GO:0046872//metal ion binding;GO:0046872//metal ion binding	GO:0016337//single organismal cell-cell adhesion;GO:0016337//single organismal cell-cell adhesion	gi|14589931|ref|NP_002580.2|/0/protocadherin-7 isoform a precursor [Homo sapiens]
3694	4624.27	2.7225	0.515	-2.40229	Down	0.999166	ITGB6	1	K06589|1|0.0|1556|hsa:3694|integrin beta 6	GO:0005887//integral component of plasma membrane;GO:0005887//integral component of plasma membrane;GO:0005887//integral component of plasma membrane;GO:0005887//integral component of plasma membrane;GO:0005887//integral component of plasma membrane;GO:0005887//integral component of plasma membrane;GO:0005887//integral component of plasma membrane	GO:0004871//signal transducer activity;GO:0005102//receptor binding;GO:0004871//signal transducer activity;GO:0005102//receptor binding;GO:0004871//signal transducer activity;GO:0005102//receptor binding;GO:0004871//signal transducer activity;GO:0005102//receptor binding;GO:0004871//signal transducer activity;GO:0005102//receptor binding;GO:0004871//signal transducer activity;GO:0005102//receptor…	GO:0051704;GO:0006952//defense response;GO:0032501//multicellular organismal process;GO:0031589//cell-substrate adhesion;GO:0007166//cell surface receptor signaling pathway;GO:0051704;GO:0006952//defense response;GO:0032501//multicellular organismal process;GO:0031589//cell-substrate adhesion;GO:0007166//cell surface receptor signaling pathway;GO:0051704;GO:0006952//defense response;GO:0032501//m…	gi|538916893|ref|NP_001269283.1|/0/integrin beta-6 isoform b precursor [Homo sapiens]
29108	725	4.825	0.94	-2.3598	Down	1	PYCARD	2	K12799|1|2e-84|313|ptr:742444|apoptosis-associated speck-like protein containing a CARD	GO:0044424;GO:0043234//protein complex;GO:0044424;GO:0043234//protein complex	GO:0004175//endopeptidase activity;GO:0016505//peptidase activator activity involved in apoptotic process;GO:0019904//protein domain specific binding;GO:0042802//identical protein binding;GO:0004175//endopeptidase activity;GO:0016505//peptidase activator activity involved in apoptotic process;GO:0019904//protein domain specific binding;GO:0042802//identical protein binding	GO:0010952//positive regulation of peptidase activity;GO:0051091//positive regulation of sequence-specific DNA binding transcription factor activity;GO:0019221//cytokine-mediated signaling pathway;GO:0032731//positive regulation of interleukin-1 beta production;GO:0006915//apoptotic process;GO:0012502//induction of programmed cell death;GO:0019538//protein metabolic process;GO:0010952//positive r…	gi|48257192|gb|AAH13569.2|/1.2074e-82/PYCARD protein, partial [Homo sapiens]
8519	733	25.2875	5.015	-2.3341	Down	0.999376	IFITM1	3	K19831|1|9e-67|255|pps:100970132|interferon induced transmembrane protein 1	GO:0031224//intrinsic component of membrane	GO:0005488//binding	GO:0019221//cytokine-mediated signaling pathway;GO:0002682//regulation of immune system process;GO:0006952//defense response;GO:0008283//cell proliferation;GO:0051707//response to other organism	gi|150010589|ref|NP_003632.3|/6.90615e-66/interferon-induced transmembrane protein 1 [Homo sapiens]
2626	2662	1.5225	0.305	-2.31956	Down	0.998181	GATA4	4	K09183|1|6e-180|634|nle:100602105|GATA-binding protein 4	GO:0031981//nuclear lumen;GO:0031981//nuclear lumen;GO:0031981//nuclear lumen	GO:0046914//transition metal ion binding;GO:0001071//nucleic acid binding transcription factor activity;GO:0043565//sequence-specific DNA binding;GO:0008134//transcription factor binding;GO:0001071//nucleic acid binding transcription factor activity;GO:0046872//metal ion binding;GO:0043565//sequence-specific DNA binding;GO:0008134//transcription factor binding;GO:0001071//nucleic acid binding tra…	GO:0003284//septum primum development;GO:0060411//cardiac septum morphogenesis;GO:0007599//hemostasis;GO:0042127//regulation of cell proliferation;GO:0007369//gastrulation;GO:0006357//regulation of transcription from RNA polymerase II promoter;GO:0045597//positive regulation of cell differentiation;GO:0048562//embryonic organ morphogenesis;GO:0009952//anterior/posterior pattern specification;GO:0…	gi|820982424|ref|XP_012366595.1|/5.04819e-112/PREDICTED: transcription factor GATA-4 isoform X1 [Nomascus leucogenys]
23213	5620.69	13.265	2.695	-2.29927	Down	0.999996	SULF1	1	K14607|1|0.0|1174|hsa:23213|extracellular sulfatase Sulf [EC:3.1.6.-]	GO:0044431//Golgi apparatus part;GO:0044421;GO:0044431//Golgi apparatus part;GO:0044421;GO:0044431//Golgi apparatus part;GO:0044421;GO:0044431//Golgi apparatus part;GO:0044421;GO:0044431//Golgi apparatus part;GO:0044421	GO:0046872//metal ion binding;GO:0008484//sulfuric ester hydrolase activity;GO:0046872//metal ion binding;GO:0008484//sulfuric ester hydrolase activity;GO:0046872//metal ion binding;GO:0008484//sulfuric ester hydrolase activity;GO:0046872//metal ion binding;GO:0008484//sulfuric ester hydrolase activity;GO:0046872//metal ion binding;GO:0008484//sulfuric ester hydrolase activity	GO:0006029//proteoglycan metabolic process;GO:0012501//programmed cell death;GO:0008543//fibroblast growth factor receptor signaling pathway;GO:0048513//animal organ development;GO:0006029//proteoglycan metabolic process;GO:0012501//programmed cell death;GO:0008543//fibroblast growth factor receptor signaling pathway;GO:0048513//animal organ development;GO:0006029//proteoglycan metabolic process;…	gi|46249932|gb|AAH68565.1|/0/SULF1 protein [Homo sapiens]
7128	4705	1.805	0.3675	-2.29618	Down	0.989794	TNFAIP3	3	K11859|1|0.0|1738|nle:100600197|tumor necrosis factor, alpha-induced protein 3 [EC:3.4.19.12]	GO:0043231//intracellular membrane-bounded organelle;GO:0005815//microtubule organizing center;GO:0043231//intracellular membrane-bounded organelle;GO:0005815//microtubule organizing center;GO:0043231//intracellular membrane-bounded organelle;GO:0005815//microtubule organizing center	GO:0016790//thiolester hydrolase activity;GO:0004869//cysteine-type endopeptidase inhibitor activity;GO:0019787//ubiquitin-like protein transferase activity;GO:0019783//ubiquitin-like protein-specific protease activity;GO:0003676//nucleic acid binding;GO:0032182//ubiquitin-like protein binding;GO:0046914//transition metal ion binding;GO:0019899//enzyme binding;GO:0016790//thiolester hydrolase act…	GO:0006461//protein complex assembly;GO:0010466//negative regulation of peptidase activity;GO:0050688//regulation of defense response to virus;GO:0002467//germinal center formation;GO:0002507//tolerance induction;GO:0016579//protein deubiquitination;GO:0045765//regulation of angiogenesis;GO:0031348//negative regulation of defense response;GO:0043433//negative regulation of sequence-specific DNA b…	gi|441601849|ref|XP_004087703.1|/0/PREDICTED: tumor necrosis factor alpha-induced protein 3 isoform X2 [Nomascus leucogenys]
51083	830	13.36	2.735	-2.28831	Down	0.99783	GAL	4	K05244|1|4e-43|177|hsa:51083|galanin	GO:0043231//intracellular membrane-bounded organelle;GO:0044444//cytoplasmic part	GO:0005179//hormone activity	GO:0009725//response to hormone;GO:0008285//negative regulation of cell proliferation;GO:0030072//peptide hormone secretion;GO:0006936//muscle contraction;GO:0006950//response to stress	gi|675790842|ref|XP_008952446.1|/1.34334e-52/PREDICTED: galanin peptides isoform X1 [Pan paniscus]
100	1574	3.4475	0.715	-2.26954	Down	0.993606	ADA	1	K01488|1|0.0|680|hsa:100|adenosine deaminase [EC:3.5.4.4]	GO:0009986//cell surface;GO:0031983//vesicle lumen;GO:0000323//lytic vacuole;GO:0044459;GO:0030425//dendrite;GO:0044297//cell body;GO:0044421;GO:0009986//cell surface;GO:0031983//vesicle lumen;GO:0000323//lytic vacuole;GO:0044459;GO:0030425//dendrite;GO:0044297//cell body;GO:0044421;GO:0009986//cell surface;GO:0031983//vesicle lumen;GO:0000323//lytic vacuole;GO:0044459;GO:0030425//dendrite;GO:004…	GO:0001882//nucleoside binding;GO:0046914//transition metal ion binding;GO:0016814//hydrolase activity, acting on carbon-nitrogen (but not peptide) bonds, in cyclic amidines;GO:0001882//nucleoside binding;GO:0046914//transition metal ion binding;GO:0016814//hydrolase activity, acting on carbon-nitrogen (but not peptide) bonds, in cyclic amidines;GO:0001882//nucleoside binding;GO:0046914//transiti…	GO:0050856//regulation of T cell receptor signaling pathway;GO:0002027//regulation of heart rate;GO:0009113//purine nucleobase biosynthetic process;GO:0002467//germinal center formation;GO:0051241;GO:0046102;GO:0009217//purine deoxyribonucleoside triphosphate catabolic process;GO:0046090;GO:0031348//negative regulation of defense response;GO:0002901;GO:0001825//blastocyst formation;GO:0046085//ad…	gi|617637686|ref|XP_007530961.1|/9.63114e-152/PREDICTED: adenosine deaminase [Erinaceus europaeus]
26812	66	2.1575	0.4575	-2.23752	Down	0.971773	SNORD37	1	-	-	-	-	-
100500802	62	2.48	0.535	-2.21273	Down	0.96128	MIR3685	1	-	-	-	-	-
7409	2848	1.45	0.315	-2.20263	Down	0.999998	VAV1	1	K05730|1|0.0|1609|hsa:7409|guanine nucleotide exchange factor VAV	GO:0044444//cytoplasmic part;GO:0016020//membrane;GO:0044444//cytoplasmic part;GO:0016020//membrane;GO:0044444//cytoplasmic part;GO:0016020//membrane	GO:0043169//cation binding;GO:0005088//Ras guanyl-nucleotide exchange factor activity;GO:0001071//nucleic acid binding transcription factor activity;GO:0043169//cation binding;GO:0005088//Ras guanyl-nucleotide exchange factor activity;GO:0001071//nucleic acid binding transcription factor activity;GO:0043169//cation binding;GO:0005088//Ras guanyl-nucleotide exchange factor activity;GO:0001071//nuc…	GO:0007169//transmembrane receptor protein tyrosine kinase signaling pathway;GO:0009966//regulation of signal transduction;GO:0007599//hemostasis;GO:0010467//gene expression;GO:0031294//lymphocyte costimulation;GO:0007266//Rho protein signal transduction;GO:0007169//transmembrane receptor protein tyrosine kinase signaling pathway;GO:0009966//regulation of signal transduction;GO:0007599//hemostasi…	gi|635035607|ref|XP_007993205.1|/0/PREDICTED: proto-oncogene vav [Chlorocebus sabaeus]
100422965	83	1.3675	0.2975	-2.20058	Down	0.962996	MIR4263	1	-	-	-	-	-
26471	884	24.19	5.5325	-2.12841	Down	1	NUPR1	1	K15626|1|8e-27|123|nle:100606106|nuclear protein, 1	GO:0043231//intracellular membrane-bounded organelle;GO:0043231//intracellular membrane-bounded organelle	-	GO:0065007//biological regulation;GO:0009987//cellular process;GO:0040007//growth;GO:0012502//induction of programmed cell death;GO:0040007//growth	gi|795122638|ref|XP_011788889.1|/4.99405e-27/PREDICTED: nuclear protein 1 isoform X2 [Colobus angolensis palliatus]
594837	73	3.125	0.7425	-2.07339	Down	0.991639	SNORD101	1	-	-	-	-	-
26227	2021	50.19	11.9325	-2.0725	Down	1	PHGDH	3	K00058|1|0.0|1050|pps:100985690|D-3-phosphoglycerate dehydrogenase [EC:1.1.1.95]	-	GO:0016616//oxidoreductase activity, acting on the CH-OH group of donors, NAD or NADP as acceptor;GO:0000166//nucleotide binding	GO:0007417//central nervous system development;GO:0006563//L-serine metabolic process	gi|397469414|ref|XP_003806351.1|/0/PREDICTED: D-3-phosphoglycerate dehydrogenase [Pan paniscus]
1847	2545	5.725	1.38	-2.05261	Down	0.999887	DUSP5	3	K04459|1|0.0|750|hsa:1847|dual specificity MAP kinase phosphatase [EC:3.1.3.16 3.1.3.48]	GO:0031981//nuclear lumen	GO:0008138//protein tyrosine/serine/threonine phosphatase activity	GO:0000165//MAPK cascade;GO:0001704//formation of primary germ layer;GO:0006464//cellular protein modification process	gi|119569944|gb|EAW49559.1|/0/dual specificity phosphatase 5, isoform CRA_a [Homo sapiens]
101927793	2323	4.02	0.9775	-2.04003	Down	0.999996	LOC101927793	1	K10053|1|2e-24|117|cmk:103184601|runt-related transcription factor 1; translocated to, 1	-	-	-	gi|119587158|gb|EAW66754.1|/2.60371e-109/hCG1983455, partial [Homo sapiens]
57168	3313	2.0175	0.4925	-2.03437	Down	0.994208	ASPHD2	4	K00476|1|3e-25|120|sko:100369952|aspartate beta-hydroxylase [EC:1.14.11.16]	GO:0031227//intrinsic component of endoplasmic reticulum membrane	GO:0016706//oxidoreductase activity, acting on paired donors, with incorporation or reduction of molecular oxygen, 2-oxoglutarate as one donor, and incorporation of one atom each of oxygen into both donors;GO:0016701//oxidoreductase activity, acting on single donors with incorporation of molecular oxygen	GO:0006464//cellular protein modification process	gi|817299778|ref|XP_012320326.1|/0/PREDICTED: aspartate beta-hydroxylase domain-containing protein 2 isoform X1 [Aotus nancymaae]
55601	6099	1.135	0.2925	-1.95618	Down	0.990053	DDX60	5	K20103|1|0.0|3418|hsa:55601|ATP-dependent RNA helicase DDX60 [EC:3.6.4.13]	-	GO:0003676//nucleic acid binding;GO:0032559//adenyl ribonucleotide binding;GO:0042623//ATPase activity, coupled	-	gi|222831595|ref|NP_060101.3|/0/probable ATP-dependent RNA helicase DDX60 [Homo sapiens]
100616468	85	1.0775	0.28	-1.94419	Down	0.896444	MIR4742	1	-	-	-	-	-
79623	2735	3.415	0.895	-1.93193	Down	1	GALNT14	1	K00710|1|0.0|1032|hsa:79623|polypeptide N-acetylgalactosaminyltransferase [EC:2.4.1.41]	GO:0012505//endomembrane system;GO:0031224//intrinsic component of membrane;GO:0043231//intracellular membrane-bounded organelle;GO:0012505//endomembrane system;GO:0031224//intrinsic component of membrane;GO:0043231//intracellular membrane-bounded organelle;GO:0012505//endomembrane system;GO:0031224//intrinsic component of membrane;GO:0043231//intracellular membrane-bounded organelle;GO:0012505//…	GO:0030246//carbohydrate binding;GO:0008376//acetylgalactosaminyltransferase activity;GO:0030246//carbohydrate binding;GO:0008376//acetylgalactosaminyltransferase activity;GO:0030246//carbohydrate binding;GO:0008376//acetylgalactosaminyltransferase activity;GO:0030246//carbohydrate binding;GO:0008376//acetylgalactosaminyltransferase activity;GO:0030246//carbohydrate binding;GO:0008376//acetylgala…	-	gi|767915225|ref|XP_011531406.1|/0/PREDICTED: polypeptide N-acetylgalactosaminyltransferase 14 isoform X2 [Homo sapiens]
116843	2440	2.8625	0.7525	-1.92751	Down	1	SLC18B1	2	K08155|1|2e-15|87.0|nle:100592997|MFS transporter, DHA1 family, solute carrier family 18 (vesicular amine transporter), member 1/2	GO:0031224//intrinsic component of membrane	-	GO:0006810//transport	gi|16445357|ref|NP_439896.1|/0/MFS-type transporter SLC18B1 [Homo sapiens]
8061	1561	2.305	0.6125	-1.91199	Down	0.999884	FOSL1	1	K04502|1|5e-40|167|rro:104664803|fos-like antigen 1	GO:0044464;GO:0044464;GO:0044464;GO:0044464;GO:0044464	GO:0005488//binding;GO:0005488//binding;GO:0005488//binding;GO:0005488//binding;GO:0005488//binding	GO:0006351//transcription, DNA-templated;GO:0010033//response to organic substance;GO:0050794//regulation of cellular process;GO:0051707//response to other organism;GO:0010033//response to organic substance;GO:0006355//regulation of transcription, DNA-templated;GO:0008283//cell proliferation;GO:0048522;GO:0006952//defense response;GO:0009605//response to external stimulus;GO:0051707//response to …	gi|640805553|ref|XP_008059203.1|/1.94736e-39/PREDICTED: fos-related antigen 1 isoform X2 [Tarsius syrichta]
203328	1172.54	11.55	3.0825	-1.90572	Down	0.999578	SUSD3	1	-	GO:0031224//intrinsic component of membrane;GO:0031224//intrinsic component of membrane;GO:0031224//intrinsic component of membrane;GO:0016020//membrane	-	-	gi|558757388|ref|NP_001273937.1|/6.21587e-84/sushi domain-containing protein 3 isoform e [Homo sapiens]
2171	751	31.3825	8.405	-1.90064	Down	1	FABP5	2	K08754|1|1e-73|278|pps:100979351|fatty acid-binding protein 5, epidermal	GO:0044424	GO:0008289//lipid binding	GO:0008645//hexose transport;GO:0009888//tissue development;GO:0046470//phosphatidylcholine metabolic process;GO:0019318//hexose metabolic process	gi|795574600|ref|XP_011910842.1|/2.31566e-80/PREDICTED: fatty acid-binding protein, epidermal [Cercocebus atys]
2274	1772.43	7.23	1.94	-1.89794	Down	1	FHL2	1	K14380|1|0.0|786|mcf:102133294|four and a half LIM domains protein 2	GO:0043231//intracellular membrane-bounded organelle;GO:0005856//cytoskeleton;GO:0031672//A band;GO:0031674//I band;GO:0005924//cell-substrate adherens junction;GO:0043231//intracellular membrane-bounded organelle;GO:0005856//cytoskeleton;GO:0031672//A band;GO:0031674//I band;GO:0005924//cell-substrate adherens junction;GO:0043231//intracellular membrane-bounded organelle;GO:0005856//cytoskeleton…	GO:0003712//transcription cofactor activity;GO:0046914//transition metal ion binding;GO:0035258//steroid hormone receptor binding;GO:0003712//transcription cofactor activity;GO:0046914//transition metal ion binding;GO:0035258//steroid hormone receptor binding;GO:0003712//transcription cofactor activity;GO:0046872//metal ion binding;GO:0035258//steroid hormone receptor binding;GO:0005515//protein …	GO:0006629//lipid metabolic process;GO:0009719;GO:0006355//regulation of transcription, DNA-templated;GO:0030518//intracellular steroid hormone receptor signaling pathway;GO:0006629//lipid metabolic process;GO:0009719;GO:0006355//regulation of transcription, DNA-templated;GO:0030518//intracellular steroid hormone receptor signaling pathway;GO:0006629//lipid metabolic process;GO:0009719;GO:0006355…	gi|821013852|ref|XP_012351184.1|/0/PREDICTED: four and a half LIM domains protein 2 isoform X1 [Nomascus leucogenys]
863	4073.78	29.1625	7.975	-1.87056	Down	1	CBFA2T3	2	K10053|1|0.0|784|ngi:103729546|runt-related transcription factor 1; translocated to, 1	GO:0031981//nuclear lumen;GO:0012505//endomembrane system;GO:0031981//nuclear lumen;GO:0012505//endomembrane system	GO:0046914//transition metal ion binding;GO:0001071//nucleic acid binding transcription factor activity;GO:0046914//transition metal ion binding;GO:0001071//nucleic acid binding transcription factor activity	GO:0002573//myeloid leukocyte differentiation;GO:0006351//transcription, DNA-templated;GO:0002573//myeloid leukocyte differentiation;GO:0006351//transcription, DNA-templated	gi|119587155|gb|EAW66751.1|/0/core-binding factor, runt domain, alpha subunit 2; translocated to, 3, isoform CRA_d [Homo sapiens]
29780	1596	3.7175	1.0225	-1.86223	Down	0.999999	PARVB	2	K06275|1|0.0|740|ggo:101127277|parvin	GO:0005924//cell-substrate adherens junction;GO:0043232;GO:0044444//cytoplasmic part;GO:0005924//cell-substrate adherens junction;GO:0043232;GO:0044444//cytoplasmic part;GO:0005924//cell-substrate adherens junction;GO:0043232;GO:0044444//cytoplasmic part;GO:0005924//cell-substrate adherens junction;GO:0043232;GO:0044444//cytoplasmic part	GO:0008092//cytoskeletal protein binding;GO:0008092//cytoskeletal protein binding;GO:0008092//cytoskeletal protein binding;GO:0008092//cytoskeletal protein binding	GO:0034330;GO:0034330;GO:0034330;GO:0034330	gi|7208830|emb|CAB76900.1|/0/hypothetical protein [Homo sapiens]
9636	685	44.785	12.3325	-1.86055	Down	1	ISG15	3	K12159|1|3e-76|286|hsa:9636|ubiquitin cross-reactive protein	GO:0044444//cytoplasmic part;GO:0044421	GO:0005488//binding	GO:0051707//response to other organism;GO:0051603//proteolysis involved in cellular protein catabolic process;GO:0019221//cytokine-mediated signaling pathway;GO:0001818//negative regulation of cytokine production;GO:0007154//cell communication;GO:0006464//cellular protein modification process	gi|4826774|ref|NP_005092.1|/2.38142e-75/ubiquitin-like protein ISG15 precursor [Homo sapiens]
9249	1536.55	3.85	1.0825	-1.83049	Down	0.998514	DHRS3	1	K11146|1|1e-133|479|rro:104668927|short-chain dehydrogenase/reductase 3 [EC:1.1.1.300]	GO:0031224//intrinsic component of membrane;GO:0031224//intrinsic component of membrane	GO:0005488//binding;GO:0008106//alcohol dehydrogenase (NADP+) activity;GO:0005488//binding;GO:0008106//alcohol dehydrogenase (NADP+) activity	GO:0050953//sensory perception of light stimulus;GO:0001523//retinoid metabolic process;GO:0050953//sensory perception of light stimulus;GO:0001523//retinoid metabolic process	gi|3450828|gb|AAC63263.1|/8.11348e-133/retinal short-chain dehydrogenase/reductase retSDR1 [Homo sapiens]
3975	3428	1.1925	0.34	-1.81038	Down	0.999645	LHX1	4	K09372|1|0.0|724|hsa:3975|LIM homeobox protein 1	GO:0043231//intracellular membrane-bounded organelle	GO:0046914//transition metal ion binding;GO:0001071//nucleic acid binding transcription factor activity;GO:0003677//DNA binding	GO:0022037//metencephalon development;GO:0035295//tube development;GO:0003002//regionalization;GO:0007267//cell-cell signaling;GO:0021533//cell differentiation in hindbrain;GO:0009798//axis specification;GO:0006351//transcription, DNA-templated;GO:0001704//formation of primary germ layer	gi|30410785|ref|NP_005559.2|/0/LIM/homeobox protein Lhx1 [Homo sapiens]
79094	1867	2.2425	0.6525	-1.78106	Down	0.999958	CHAC1	4	K07232|1|1e-151|421|cjc:100407826|cation transport protein ChaC	GO:0044444//cytoplasmic part;GO:0044444//cytoplasmic part	GO:0005488//binding;GO:0005488//binding	GO:0006915//apoptotic process;GO:0006915//apoptotic process;GO:0006950//response to stress	gi|958753309|ref|XP_014712856.1|/8.52078e-121/PREDICTED: LOW QUALITY PROTEIN: glutathione-specific gamma-glutamylcyclotransferase 1 [Equus asinus]
100529241	4279	2.765	0.8175	-1.75799	Down	0.989253	HSPE1-MOB4	1	K04078|1|8e-22|109|pale:102891560|chaperonin GroES	-	-	-	gi|674078135|ref|XP_008846521.1|/2.83488e-147/PREDICTED: MOB-like protein phocein isoform X3 [Nannospalax galili]
12	1629	77.725	23.0175	-1.75565	Down	0.9965	SERPINA3	4	K04525|1|0.0|830|ggo:101151276|serpin peptidase inhibitor, clade A	GO:0043231//intracellular membrane-bounded organelle	GO:0003676//nucleic acid binding;GO:0004866//endopeptidase inhibitor activity	GO:0010669//epithelial structure maintenance;GO:0006629//lipid metabolic process;GO:0010466//negative regulation of peptidase activity;GO:0002526//acute inflammatory response;GO:0006508//proteolysis	gi|193787435|dbj|BAG52641.1|/0/unnamed protein product [Homo sapiens]
3383	3249	3.42	1.015	-1.75252	Down	0.985675	ICAM1	2	K06490|1|0.0|958|hsa:3383|intercellular adhesion molecule 1	GO:0009986//cell surface;GO:0044459;GO:0016021//integral component of membrane;GO:0044421	GO:0005102//receptor binding;GO:0004872//receptor activity	GO:0002687//positive regulation of leukocyte migration;GO:0070555//response to interleukin-1;GO:0019229//regulation of vasoconstriction;GO:0002286//T cell activation involved in immune response;GO:0051091//positive regulation of sequence-specific DNA binding transcription factor activity;GO:0016337//single organismal cell-cell adhesion;GO:0001678//cellular glucose homeostasis;GO:0031667//response…	gi|167466198|ref|NP_000192.2|/0/intercellular adhesion molecule 1 precursor [Homo sapiens]
26801	63	3.4225	1.0175	-1.75002	Down	0.970893	SNORD48	1	-	-	-	-	-
933	3036	2.115	0.63	-1.74723	Down	0.999346	CD22	1	K06467|1|0.0|1417|hsa:933|CD22 antigen	GO:0016021//integral component of membrane;GO:0009986//cell surface;GO:0044425;GO:0016021//integral component of membrane;GO:0009986//cell surface;GO:0016021//integral component of membrane;GO:0009986//cell surface	GO:0030246//carbohydrate binding;GO:0005488//binding;GO:0030246//carbohydrate binding;GO:0030246//carbohydrate binding	GO:0009987//cellular process;GO:0009987//cellular process;GO:0009987//cellular process	gi|297374825|ref|NP_001172028.1|/0/B-cell receptor CD22 isoform 2 precursor [Homo sapiens]
83666	3682.68	15.5625	4.6375	-1.74665	Down	0.999531	PARP9	1	K15260|1|0.0|1541|hsa:83666|poly [ADP-ribose] polymerase 9 [EC:2.4.2.30]	GO:0044444//cytoplasmic part;GO:0043231//intracellular membrane-bounded organelle;GO:0044444//cytoplasmic part;GO:0043231//intracellular membrane-bounded organelle;GO:0044444//cytoplasmic part;GO:0043231//intracellular membrane-bounded organelle;GO:0044444//cytoplasmic part;GO:0043231//intracellular membrane-bounded organelle;GO:0044444//cytoplasmic part;GO:0043231//intracellular membrane-bounded…	GO:0005488//binding;GO:0016763//transferase activity, transferring pentosyl groups;GO:0005488//binding;GO:0016763//transferase activity, transferring pentosyl groups;GO:0005488//binding;GO:0016763//transferase activity, transferring pentosyl groups;GO:0005488//binding;GO:0016763//transferase activity, transferring pentosyl groups;GO:0005488//binding;GO:0016763//transferase activity, transferring …	GO:0048870//cell motility;GO:0048870//cell motility;GO:0048870//cell motility;GO:0048870//cell motility;GO:0048870//cell motility;GO:0048870//cell motility	gi|226371712|ref|NP_001139575.1|/0/poly [ADP-ribose] polymerase 9 isoform b [Homo sapiens]
5971	2297	1.72	0.515	-1.73976	Down	0.990118	RELB	3	K09253|1|0.0|987|hsa:5971|transcription factor RelB	GO:0043231//intracellular membrane-bounded organelle;GO:0044444//cytoplasmic part	GO:0003712//transcription cofactor activity;GO:0003676//nucleic acid binding;GO:0001071//nucleic acid binding transcription factor activity	GO:0001773//myeloid dendritic cell activation;GO:0042093//T-helper cell differentiation;GO:0006351//transcription, DNA-templated	gi|35493878|ref|NP_006500.2|/0/transcription factor RelB [Homo sapiens]
56475	1496	1.965	0.59	-1.73574	Down	0.997523	RPRM	2	K10128|1|1e-54|216|lve:103074247|reprimo, TP53-dependent G2 arrest mediator candidate	GO:0044424;GO:0031224//intrinsic component of membrane	GO:0005488//binding	GO:0022402//cell cycle process;GO:0000278//mitotic cell cycle	gi|9790193|ref|NP_062819.1|/8.84751e-54/protein reprimo [Homo sapiens]
6662	3963	2.9825	0.9025	-1.72452	Down	0.995627	SOX9	3	K18435|1|0.0|884|mcc:574208|transcription factor SOX9 (SOX group E)	GO:0031981//nuclear lumen	GO:0001071//nucleic acid binding transcription factor activity;GO:0043565//sequence-specific DNA binding	GO:0045661//regulation of myoblast differentiation;GO:0008544//epidermis development;GO:0002062//chondrocyte differentiation;GO:0007542;GO:0006357//regulation of transcription from RNA polymerase II promoter;GO:0060349//bone morphogenesis;GO:0045165//cell fate commitment;GO:0016337//single organismal cell-cell adhesion;GO:0030279//negative regulation of ossification;GO:0008406//gonad development;…	gi|60360276|dbj|BAD90382.1|/0/mKIAA4243 protein [Mus musculus]
11240	4363	2.24	0.68	-1.71989	Down	1	PADI2	2	K01481|1|0.0|1363|pps:100989222|protein-arginine deiminase [EC:3.5.3.15]	GO:0044424	GO:0046872//metal ion binding;GO:0016813//hydrolase activity, acting on carbon-nitrogen (but not peptide) bonds, in linear amidines	GO:0018195//peptidyl-arginine modification	gi|753535995|pdb|4N2B|A/0/Chain A, Crystal Structure Of Protein Arginine Deiminase 2 (10 Mm Ca2+)
171024	7542.36	3	0.9125	-1.71707	Down	0.999958	SYNPO2	2	K19867|1|4e-10|70.9|hmg:100200433|LIM domain-binding protein 3;K06086|2|6e-10|70.1|crg:105332198|sorbin and SH3 domain containing 1	GO:0031674//I band;GO:0043231//intracellular membrane-bounded organelle;GO:0031674//I band;GO:0043231//intracellular membrane-bounded organelle	GO:0051393//alpha-actinin binding;GO:0051393//alpha-actinin binding	-	gi|223460070|gb|AAI36257.1|/4.48028e-100/Synaptopodin 2 [Homo sapiens]
4501	468	7.5775	2.33	-1.70139	Down	1	MT1X	3	K14739|1|1e-09|64.3|mcf:101867369|metallothionein 1/2	-	-	-	gi|119603291|gb|EAW82885.1|/3.86673e-18/metallothionein 1X, isoform CRA_a, partial [Homo sapiens]
27090	1693.74	3.2825	1.0125	-1.69687	Down	1	ST6GALNAC4	3	K03374|1|4e-171|603|hsa:27090|N-acetylgalactosaminide alpha-2,6-sialyltransferase (sialyltransferase 7D) [EC:2.4.99.7]	GO:0031228//intrinsic component of Golgi membrane;GO:0031228//intrinsic component of Golgi membrane	GO:0008373//sialyltransferase activity;GO:0008373//sialyltransferase activity	GO:0006643//membrane lipid metabolic process;GO:0006464//cellular protein modification process;GO:0006643//membrane lipid metabolic process;GO:0006464//cellular protein modification process	gi|28373092|ref|NP_778204.1|/3.0823e-170/alpha-N-acetyl-neuraminyl-2,3-beta-galactosyl-1,3-N-acetyl-galactosaminide alpha-2,6-sialyltransferase isoform a [Homo sapiens]
6004	2432	6.34	1.9625	-1.69179	Down	0.999883	RGS16	3	K16449|1|1e-103|380|cjc:100404849|regulator of G-protein signaling	GO:0044425;GO:0044424	GO:0060089;GO:0008047//enzyme activator activity;GO:0005515//protein binding	GO:0050953//sensory perception of light stimulus;GO:0007186//G-protein coupled receptor signaling pathway	gi|675745643|ref|XP_002760338.2|/1.11591e-102/PREDICTED: regulator of G-protein signaling 16 isoform X1 [Callithrix jacchus]
693149	94	1.4775	0.4625	-1.67563	Down	0.865842	MIR564	1	-	-	-	-	-
10379	1699	22.495	7.055	-1.67289	Down	1	IRF9	4	K04693|1|0.0|793|hsa:10379|interferon regulatory factor 9	GO:0031981//nuclear lumen;GO:0044444//cytoplasmic part	GO:0003676//nucleic acid binding;GO:0001071//nucleic acid binding transcription factor activity;GO:0005515//protein binding	GO:0051707//response to other organism;GO:0042089//cytokine biosynthetic process;GO:0019221//cytokine-mediated signaling pathway;GO:0006351//transcription, DNA-templated	gi|25282407|ref|NP_006075.3|/0/interferon regulatory factor 9 [Homo sapiens]
26811	74	3.405	1.0725	-1.66668	Down	0.975087	SNORD55	2	-	-	-	-	-
2139	2660.93	4.425	1.4025	-1.65768	Down	0.999709	EYA2	3	K17620|1|0.0|804|ggo:101132212|eyes absent homolog 2 [EC:3.1.3.48]	GO:0043231//intracellular membrane-bounded organelle;GO:0043231//intracellular membrane-bounded organelle	GO:0046872//metal ion binding;GO:0004721//phosphoprotein phosphatase activity;GO:0005488//binding;GO:0004721//phosphoprotein phosphatase activity	GO:0012501//programmed cell death;GO:0006470//protein dephosphorylation;GO:0006259//DNA metabolic process;GO:0032501//multicellular organismal process;GO:0006325//chromatin organization;GO:0001708//cell fate specification;GO:0012501//programmed cell death;GO:0006470//protein dephosphorylation;GO:0006259//DNA metabolic process;GO:0032501//multicellular organismal process;GO:0006325//chromatin orga…	gi|33871134|gb|AAH13882.2|/0/EYA2 protein, partial [Homo sapiens]
85450	6633	2.52	0.805	-1.64636	Down	0.999011	ITPRIP	1	-	GO:0016020//membrane;GO:0016020//membrane;GO:0016020//membrane	-	-	gi|530394567|ref|XP_005270314.1|/0/PREDICTED: inositol 1,4,5-trisphosphate receptor-interacting protein isoform X1 [Homo sapiens]
692088	71	4.81	1.5525	-1.63144	Down	0.995378	SNORD50B	3	-	-	-	-	-
9915	6576	5.435	1.7625	-1.62466	Down	1	ARNT2	3	K15589|1|0.0|1297|mcf:101925178|aryl hydrocarbon receptor nuclear translocator 2	GO:0043231//intracellular membrane-bounded organelle;GO:0043234//protein complex	GO:0003676//nucleic acid binding;GO:0060089;GO:0001071//nucleic acid binding transcription factor activity;GO:0005102//receptor binding;GO:0046983//protein dimerization activity	GO:0006357//regulation of transcription from RNA polymerase II promoter;GO:0006915//apoptotic process;GO:0043627//response to estrogen;GO:0043009//chordate embryonic development;GO:0007399//nervous system development;GO:0008283//cell proliferation;GO:0006950//response to stress	gi|426380053|ref|XP_004056698.1|/0/PREDICTED: aryl hydrocarbon receptor nuclear translocator 2 isoform 2 [Gorilla gorilla gorilla]
692204	97	3.405	1.105	-1.62361	Down	0.99328	SNORD88C	1	-	-	-	-	-
3976	3987	1.71	0.555	-1.62344	Down	0.998522	LIF	1	K05419|1|1e-94|351|nle:100602909|leukemia inhibitory factor	GO:0044421;GO:0044421	GO:0005126//cytokine receptor binding;GO:0005126//cytokine receptor binding	GO:0033138//positive regulation of peptidyl-serine phosphorylation;GO:0042508//tyrosine phosphorylation of Stat1 protein;GO:0048609//multicellular organismal reproductive process;GO:0003006//developmental process involved in reproduction;GO:0045687//positive regulation of glial cell differentiation;GO:0060706//cell differentiation involved in embryonic placenta development;GO:0046887//positive re…	gi|187141|gb|AAA59517.1|/9.7805e-94/myeloid leukemia-inhibitory factor (AA at 10), partial [Homo sapiens]
27289	1665	3.0075	0.98	-1.61771	Down	0.994575	RND1	3	K07531|1|2e-130|468|ggo:101142211|Rho family GTPase 1	GO:0070161;GO:0043232;GO:0044444//cytoplasmic part	GO:0017111//nucleoside-triphosphatase activity;GO:0032561//guanyl ribonucleotide binding;GO:0005515//protein binding	GO:0035556//intracellular signal transduction;GO:0006935//chemotaxis;GO:0042551//neuron maturation;GO:0030036//actin cytoskeleton organization;GO:0009207;GO:0007155//cell adhesion	gi|7657514|ref|NP_055285.1|/1.48957e-129/rho-related GTP-binding protein Rho6 precursor [Homo sapiens]
101928837	348	1.23	0.405	-1.60266	Down	0.973437	LOC101928837	1	-	-	-	-	-
51655	1814	1.9	0.6325	-1.58686	Down	0.998836	RASD1	1	K07843|1|3e-138|494|nle:100589586|RAS, dexamethasone-induced Ras-related protein 1	GO:0043231//intracellular membrane-bounded organelle;GO:0044444//cytoplasmic part;GO:0016020//membrane;GO:0043231//intracellular membrane-bounded organelle;GO:0044444//cytoplasmic part;GO:0016020//membrane	GO:0017111//nucleoside-triphosphatase activity;GO:0032561//guanyl ribonucleotide binding;GO:0017111//nucleoside-triphosphatase activity;GO:0032561//guanyl ribonucleotide binding	GO:0035556//intracellular signal transduction;GO:0006355//regulation of transcription, DNA-templated;GO:0009207;GO:0007166//cell surface receptor signaling pathway;GO:0035556//intracellular signal transduction;GO:0006355//regulation of transcription, DNA-templated;GO:0009207;GO:0007166//cell surface receptor signaling pathway	gi|7706359|ref|NP_057168.1|/2.83241e-137/dexamethasone-induced Ras-related protein 1 isoform 1 proprotein [Homo sapiens]
101730217	6289	1.5725	0.5275	-1.57582	Down	0.988884	SPECC1L-ADORA2A	1	K04266|1|0.0|783|hsa:135|adenosine receptor A2a	-	-	GO:0009987//cellular process	gi|62087624|dbj|BAD92259.1|/0/KIAA0376 protein variant [Homo sapiens]
84875	3603.84	1.235	0.415	-1.57333	Down	0.997024	PARP10	1	K15261|1|0.0|1581|hsa:84875|poly [ADP-ribose] polymerase 10/14/15 [EC:2.4.2.30]	GO:0031981//nuclear lumen;GO:0031981//nuclear lumen;GO:0031981//nuclear lumen	GO:0005488//binding;GO:0016763//transferase activity, transferring pentosyl groups;GO:0005488//binding;GO:0016763//transferase activity, transferring pentosyl groups;GO:0005488//binding;GO:0016763//transferase activity, transferring pentosyl groups	-	gi|961525471|ref|NP_001304824.1|/0/poly [ADP-ribose] polymerase 10 isoform 2 [Homo sapiens]
201161	1181	4.3875	1.475	-1.57268	Down	0.999347	CENPV	2	K04650|1|3e-78|294|mgp:100539990|nuclear receptor co-repressor 1;K03434|2|1e-07|60.1|ptr:468371|N-acetylglucosaminylphosphatidylinositol deacetylase [EC:3.5.1.89]	GO:0043231//intracellular membrane-bounded organelle;GO:0000776//kinetochore;GO:0044430	GO:0016829//lyase activity	GO:0000910//cytokinesis;GO:0000087//mitotic M phase;GO:0031055//chromatin remodeling at centromere	gi|74750244|sp|Q7Z7K6.1|CENPV_HUMAN/1.68602e-107/RecName: Full=Centromere protein V; Short=CENP-V; AltName: Full=Nuclear protein p30; AltName: Full=Proline-rich protein 6
4017	3810	2.2725	0.765	-1.57075	Down	0.99895	LOXL2	2	K00280|1|0.0|1602|hsa:4017|lysyl oxidase-like protein 2/3/4 [EC:1.4.3.-]	GO:0044421;GO:0044464	GO:0016638//oxidoreductase activity, acting on the CH-NH2 group of donors;GO:0046914//transition metal ion binding;GO:0004888//transmembrane signaling receptor activity	GO:0032502//developmental process;GO:0043412//macromolecule modification;GO:0009987//cellular process	gi|119584030|gb|EAW63626.1|/0/lysyl oxidase-like 2, isoform CRA_b [Homo sapiens]
10809	1988	260.772	87.8825	-1.56914	Down	1	STARD10	2	K01866|1|2e-141|505|chx:102170371|tyrosyl-tRNA synthetase [EC:6.1.1.1];K01067|2|2e-07|60.5|cge:100752768|acetyl-CoA hydrolase [EC:3.1.2.1]	-	-	-	gi|4929573|gb|AAD34047.1|AF151810_1/1.8635e-176/CGI-52 protein [Homo sapiens]
5307	2383	9.5825	3.2525	-1.55885	Down	1	PITX1	4	K09356|1|2e-130|469|cjc:100393481|paired-like homeodomain transcription factor 1	GO:0031981//nuclear lumen	-	GO:0009987//cellular process;GO:0009888//tissue development;GO:0048513//animal organ development;GO:0009653//anatomical structure morphogenesis;GO:0061061//muscle structure development	gi|152963644|ref|NP_002644.4|/1.36464e-129/pituitary homeobox 1 [Homo sapiens]
401934	1122	11.24	3.8275	-1.55417	Down	0.994022	RNF223	1	K11983|1|3e-09|65.1|cmy:102942332|E3 ubiquitin-protein ligase RNF182 [EC:2.3.2.27];K11997|4|6e-08|60.8|nvi:100123158|tripartite motif-containing protein 2/3	-	-	-	gi|725596637|ref|XP_010348716.1|/1.01362e-94/PREDICTED: LOW QUALITY PROTEIN: RING finger protein 223 [Saimiri boliviensis boliviensis]
2119	4102	2.9175	1	-1.54473	Down	0.999544	ETV5	2	K15593|1|0.0|1004|nle:100592153|ets translocation variant 5	GO:0043231//intracellular membrane-bounded organelle	GO:0001071//nucleic acid binding transcription factor activity;GO:0043565//sequence-specific DNA binding	GO:0006979//response to oxidative stress;GO:0060688//regulation of morphogenesis of a branching structure;GO:0006351//transcription, DNA-templated	gi|821006232|ref|XP_003256646.3|/0/PREDICTED: ETS translocation variant 5 isoform X1 [Nomascus leucogenys]
8870	1254	60.66	20.88	-1.53862	Down	1	IER3	3	-	GO:0031224//intrinsic component of membrane	GO:0005488//binding	GO:0043066//negative regulation of apoptotic process;GO:0032502//developmental process	gi|119964723|ref|NP_003888.2|/8.61177e-73/radiation-inducible immediate-early gene IEX-1 [Homo sapiens]
140462	1817.07	3.0075	1.04	-1.53198	Down	0.999139	ASB9	2	K10331|1|3e-168|526|hsa:140462|ankyrin repeat and SOCS box protein 9	-	-	GO:0007165//signal transduction;GO:0007165//signal transduction;GO:0007165//signal transduction;GO:0007165//signal transduction	gi|72534772|ref|NP_001026909.1|/1.24845e-171/ankyrin repeat and SOCS box protein 9 isoform 1 [Homo sapiens]
11274	2037	8.5525	2.975	-1.52346	Down	1	USP18	3	K11846|1|0.0|767|hsa:11274|ubiquitin carboxyl-terminal hydrolase 18/41 [EC:3.4.19.12]	GO:0043231//intracellular membrane-bounded organelle;GO:0044444//cytoplasmic part	GO:0016790//thiolester hydrolase activity;GO:0019783//ubiquitin-like protein-specific protease activity	GO:0019941//modification-dependent protein catabolic process;GO:0001959//regulation of cytokine-mediated signaling pathway;GO:0006464//cellular protein modification process	gi|32313610|ref|NP_059110.2|/0/ubl carboxyl-terminal hydrolase 18 [Homo sapiens]
26788	83	1.665	0.58	-1.5214	Down	0.954244	SNORD60	1	-	-	-	-	-
54997	1039	2.31	0.805	-1.52083	Down	0.999387	TESC	2	K17612|1|1e-134|345|pps:100982301|calcineurin B homologous protein 3	GO:0043231//intracellular membrane-bounded organelle;GO:0031252//cell leading edge;GO:0016020//membrane;GO:0043231//intracellular membrane-bounded organelle;GO:0031252//cell leading edge;GO:0016020//membrane	GO:0046872//metal ion binding;GO:0004857//enzyme inhibitor activity;GO:0046872//metal ion binding;GO:0004857//enzyme inhibitor activity	GO:0030155//regulation of cell adhesion;GO:0045639//positive regulation of myeloid cell differentiation;GO:0008283//cell proliferation;GO:0008406//gonad development;GO:0030155//regulation of cell adhesion;GO:0045639//positive regulation of myeloid cell differentiation;GO:0008283//cell proliferation;GO:0008406//gonad development	gi|675799947|ref|XP_003832467.2|/1.73655e-122/PREDICTED: calcineurin B homologous protein 3 isoform X3 [Pan paniscus]
619569	132	1.605	0.56	-1.51907	Down	0.999503	SNORA41	1	-	-	-	-	-
25987	3299.37	52.7825	18.4625	-1.51546	Down	1	TSKU	1	K08130|1|0.0|673|hsa:25987|tsukushi (leucine-rich repeat-containing protein 54)	-	-	-	gi|972775802|ref|NP_001305406.1|/0/tsukushin isoform a precursor [Homo sapiens]
23138	5987	7.4325	2.625	-1.50153	Down	0.999691	N4BP3	1	-	GO:0012506//vesicle membrane;GO:0044424	-	-	gi|62177129|ref|NP_055926.1|/0/NEDD4-binding protein 3 [Homo sapiens]
23043	7139.92	1.415	0.5	-1.5008	Down	0.997528	TNIK	2	K08840|1|2e-15|85.1|mze:101483661|TRAF2 and NCK interacting kinase [EC:2.7.11.1]	GO:0031981//nuclear lumen;GO:0005768//endosome;GO:0043232;GO:0031981//nuclear lumen;GO:0005768//endosome;GO:0043232;GO:0031981//nuclear lumen;GO:0005768//endosome;GO:0043232;GO:0031981//nuclear lumen;GO:0005768//endosome;GO:0043232;GO:0031981//nuclear lumen;GO:0005768//endosome;GO:0043232;GO:0031981//nuclear lumen;GO:0005768//endosome;GO:0043232;GO:0031981//nuclear lumen;GO:0005768//endosome;GO:0…	GO:0030695//GTPase regulator activity;GO:0004672//protein kinase activity;GO:0032559//adenyl ribonucleotide binding;GO:0030695//GTPase regulator activity;GO:0004672//protein kinase activity;GO:0032559//adenyl ribonucleotide binding;GO:0030695//GTPase regulator activity;GO:0004672//protein kinase activity;GO:0032559//adenyl ribonucleotide binding;GO:0030695//GTPase regulator activity;GO:0004672//p…	GO:0048731//system development;GO:0007166//cell surface receptor signaling pathway;GO:0000186//activation of MAPKK activity;GO:0010769//regulation of cell morphogenesis involved in differentiation;GO:0030036//actin cytoskeleton organization;GO:0048731//system development;GO:0007166//cell surface receptor signaling pathway;GO:0000186//activation of MAPKK activity;GO:0010769//regulation of cell mor…	gi|239735582|ref|NP_001155033.1|/0/TRAF2 and NCK-interacting protein kinase isoform 3 [Homo sapiens]
94162	71	1.1175	0.395	-1.50035	Down	0.84101	SNORD38A	1	-	-	-	-	-
26579	2296.83	2.5225	0.9025	-1.48286	Down	0.999888	MYEOV	1	-	-	-	-	gi|42794612|ref|NP_620123.2|/1.28692e-131/myeloma-overexpressed gene protein isoform 1 [Homo sapiens]
140730	5207.08	2.7175	0.98	-1.47143	Down	0.999816	RIMS4	1	K15299|1|1e-148|531|phd:102339652|regulating synaptic membrane exocytosis protein 4	GO:0044459;GO:0044459	-	GO:0001505//regulation of neurotransmitter levels;GO:0016192//vesicle-mediated transport;GO:0001505//regulation of neurotransmitter levels;GO:0016192//vesicle-mediated transport	gi|33667061|ref|NP_892015.1|/9.21799e-148/regulating synaptic membrane exocytosis protein 4 isoform 2 [Homo sapiens]
4940	6657	18.345	6.63	-1.46831	Down	0.999855	OAS3	3	K14216|1|0.0|2145|hsa:4940|2'-5'-oligoadenylate synthetase [EC:2.7.7.84]	-	GO:0003676//nucleic acid binding;GO:0032559//adenyl ribonucleotide binding;GO:0016772//transferase activity, transferring phosphorus-containing groups	GO:0019221//cytokine-mediated signaling pathway;GO:0002376//immune system process;GO:0034641	gi|45007007|ref|NP_006178.2|/0/2'-5'-oligoadenylate synthase 3 [Homo sapiens]
429	2490	6.7175	2.4325	-1.46548	Down	0.999925	ASCL1	3	K09067|1|9e-81|304|hsa:429|achaete-scute complex protein	GO:0043231//intracellular membrane-bounded organelle	GO:0001071//nucleic acid binding transcription factor activity;GO:0008134//transcription factor binding	GO:0007166//cell surface receptor signaling pathway;GO:0048709//oligodendrocyte differentiation;GO:0045596//negative regulation of cell differentiation;GO:0003357//noradrenergic neuron differentiation;GO:0006357//regulation of transcription from RNA polymerase II promoter;GO:0033189//response to vitamin A;GO:0021895//cerebral cortex neuron differentiation;GO:0061101//neuroendocrine cell different…	gi|664717744|ref|XP_008515875.1|/8.26599e-85/PREDICTED: achaete-scute homolog 1 isoform X2 [Equus przewalskii]
170712	566	2.37	0.86	-1.46248	Down	0.998974	COX7B2	2	K02271|1|2e-34|147|ggo:101133386|cytochrome c oxidase subunit 7b	GO:0005743//mitochondrial inner membrane;GO:0031224//intrinsic component of membrane	GO:0015002//heme-copper terminal oxidase activity	-	gi|426344238|ref|XP_004038681.1|/1.3926e-33/PREDICTED: cytochrome c oxidase subunit 7B2, mitochondrial-like [Gorilla gorilla gorilla]
85388	91	6.795	2.4675	-1.46142	Down	0.996367	SNORD14B	1	-	-	-	-	-
8553	3061	10.6675	3.93	-1.44062	Down	0.999536	BHLHE40	2	K03729|1|0.0|793|ggo:101151761|class B basic helix-loop-helix protein 2	GO:0031981//nuclear lumen	GO:0003676//nucleic acid binding;GO:0001071//nucleic acid binding transcription factor activity	GO:0009314//response to radiation;GO:0006355//regulation of transcription, DNA-templated;GO:0048511//rhythmic process;GO:0048167//regulation of synaptic plasticity;GO:0009605//response to external stimulus	gi|4503299|ref|NP_003661.1|/0/class E basic helix-loop-helix protein 40 [Homo sapiens]
2034	5184	7.905	2.945	-1.4245	Down	0.996964	EPAS1	4	K09095|1|0.0|1650|nle:100606638|hypoxia-inducible factor 2 alpha	GO:0043231//intracellular membrane-bounded organelle;GO:0043234//protein complex	GO:0003712//transcription cofactor activity;GO:0060089;GO:0000981//RNA polymerase II transcription factor activity, sequence-specific DNA binding;GO:0019899//enzyme binding;GO:0003677//DNA binding;GO:0046983//protein dimerization activity	GO:0006357//regulation of transcription from RNA polymerase II promoter;GO:0048646//anatomical structure formation involved in morphogenesis;GO:0045165//cell fate commitment;GO:0023052//signaling;GO:0032501//multicellular organismal process;GO:0006950//response to stress	gi|332227348|ref|XP_003262854.1|/0/PREDICTED: endothelial PAS domain-containing protein 1 [Nomascus leucogenys]
677826	131	1.9025	0.71	-1.42201	Down	0.983989	SNORA3B	1	-	-	-	-	gi|927172358|ref|XP_013834540.1|/1.168e-06/PREDICTED: 60S ribosomal protein L27a-like isoform X1 [Sus scrofa]
3959	2277	20.89	7.8	-1.42127	Down	1	LGALS3BP	3	K17300|1|0.0|1189|nle:100600784|galectin-3-binding protein	GO:0044464;GO:0031012//extracellular matrix	GO:0005488//binding;GO:0004888//transmembrane signaling receptor activity	GO:0006952//defense response;GO:0023052//signaling;GO:0009987//cellular process	gi|5031863|ref|NP_005558.1|/0/galectin-3-binding protein precursor [Homo sapiens]
595100	67	5.845	2.1925	-1.41463	Down	0.982094	SNORD18C	1	-	-	-	-	-
5698	1048	1.795	0.675	-1.41102	Down	0.991631	PSMB9	4	K02741|1|2e-110|401|hsa:5698|20S proteasome subunit beta 9 [EC:3.4.25.1]	GO:0043231//intracellular membrane-bounded organelle;GO:0000502//proteasome complex	GO:0004175//endopeptidase activity	GO:0043161//proteasome-mediated ubiquitin-dependent protein catabolic process;GO:0051320;GO:0007050//cell cycle arrest;GO:0016070//RNA metabolic process;GO:0051439//regulation of ubiquitin-protein ligase activity involved in mitotic cell cycle;GO:0006520//cellular amino acid metabolic process;GO:0006915//apoptotic process;GO:0030330//DNA damage response, signal transduction by p53 class mediator;…	gi|4506205|ref|NP_002791.1|/1.4943e-109/proteasome subunit beta type-9 precursor [Homo sapiens]
9415	3091.28	10.76	4.0525	-1.40879	Down	1	FADS2	1	K10226|1|0.0|917|pps:100980611|acyl-CoA 6-desaturase (Delta-6 desaturase) [EC:1.14.19.3]	GO:0043231//intracellular membrane-bounded organelle;GO:0016021//integral component of membrane;GO:0031090//organelle membrane;GO:0043231//intracellular membrane-bounded organelle;GO:0016021//integral component of membrane;GO:0031090//organelle membrane;GO:0043231//intracellular membrane-bounded organelle;GO:0016021//integral component of membrane;GO:0031090//organelle membrane	GO:0016215//acyl-CoA desaturase activity;GO:0005506//iron ion binding;GO:0016215//acyl-CoA desaturase activity;GO:0005506//iron ion binding;GO:0016215//acyl-CoA desaturase activity;GO:0005506//iron ion binding	GO:0006633//fatty acid biosynthetic process;GO:0006091//generation of precursor metabolites and energy;GO:0051234//establishment of localization;GO:0006633//fatty acid biosynthetic process;GO:0006091//generation of precursor metabolites and energy;GO:0051234//establishment of localization;GO:0006633//fatty acid biosynthetic process;GO:0006091//generation of precursor metabolites and energy;GO:005…	gi|4758334|ref|NP_004256.1|/0/fatty acid desaturase 2 isoform 1 [Homo sapiens]
6337	3390.73	12.94	4.8875	-1.40467	Down	0.998954	SCNN1A	1	K04824|1|0.0|1264|ggo:101149563|amiloride-sensitive sodium channel subunit alpha	GO:0044459;GO:0009986//cell surface;GO:0015629//actin cytoskeleton;GO:0034703//cation channel complex;GO:0044459;GO:0009986//cell surface;GO:0015629//actin cytoskeleton;GO:0034703//cation channel complex;GO:0044459;GO:0009986//cell surface;GO:0015629//actin cytoskeleton;GO:0034703//cation channel complex	GO:0008092//cytoskeletal protein binding;GO:0019904//protein domain specific binding;GO:0005272//sodium channel activity;GO:0008092//cytoskeletal protein binding;GO:0019904//protein domain specific binding;GO:0005272//sodium channel activity;GO:0008092//cytoskeletal protein binding;GO:0019904//protein domain specific binding;GO:0005272//sodium channel activity	GO:0007606//sensory perception of chemical stimulus;GO:0030001//metal ion transport;GO:0007606//sensory perception of chemical stimulus;GO:0030001//metal ion transport;GO:0007606//sensory perception of chemical stimulus;GO:0030001//metal ion transport	gi|38197485|gb|AAH06526.2|/0/SCNN1A protein, partial [Homo sapiens]
8140	4575	274.27	103.855	-1.40103	Down	1	SLC7A5	6	K13780|1|0.0|848|hsa:8140|solute carrier family 7 (L-type amino acid transporter), member 5	GO:0031224//intrinsic component of membrane;GO:0044459;GO:0044444//cytoplasmic part	GO:0015171//amino acid transmembrane transporter activity;GO:0003823//antigen binding	GO:0019752//carboxylic acid metabolic process;GO:0048869//cellular developmental process;GO:0048731//system development;GO:0002376//immune system process;GO:0006807//nitrogen compound metabolic process;GO:0007599//hemostasis;GO:0006865//amino acid transport	gi|71979932|ref|NP_003477.4|/0/large neutral amino acids transporter small subunit 1 [Homo sapiens]
57491	5676	2.3	0.8725	-1.39841	Down	0.999764	AHRR	1	K09094|1|0.0|1263|hsa:57491|aryl hydrocarbon receptor repressor	GO:0031981//nuclear lumen	GO:0060089;GO:0003676//nucleic acid binding	GO:0006351//transcription, DNA-templated	gi|115430245|ref|NP_065782.2|/0/aryl hydrocarbon receptor repressor isoform 1 [Homo sapiens]
400916	631.77	27.8	10.5775	-1.39409	Down	1	CHCHD10	1	K00558|1|3e-13|76.3|ggo:101132302|DNA (cytosine-5)-methyltransferase 1 [EC:2.1.1.37];K11837|2|1e-07|57.4|bfo:BRAFLDRAFT_121867|ubiquitin carboxyl-terminal hydrolase 6/32 [EC:3.4.19.12]	GO:0043231//intracellular membrane-bounded organelle	-	-	gi|47497976|ref|NP_998885.1|/7.18476e-27/coiled-coil-helix-coiled-coil-helix domain-containing protein 10, mitochondrial isoform b precursor [Homo sapiens]
9830	4629	17.285	6.605	-1.38789	Down	1	TRIM14	2	K12004|1|0.0|722|hsa:9830|tripartite motif-containing protein 14	GO:0044424;GO:0044424	GO:0046914//transition metal ion binding;GO:0046914//transition metal ion binding	-	gi|15208663|ref|NP_055603.2|/0/tripartite motif-containing protein 14 [Homo sapiens]
60681	2888	4.1625	1.5925	-1.38616	Down	0.999759	FKBP10	3	K09575|1|0.0|1123|hsa:60681|FK506-binding protein 9/10 [EC:5.2.1.8]	GO:0044432	GO:0046872//metal ion binding;GO:0016859//cis-trans isomerase activity;GO:0005527//macrolide binding	GO:0018193//peptidyl-amino acid modification	gi|31873404|emb|CAD97695.1|/0/hypothetical protein [Homo sapiens]
6566	3927	18.29	7.0025	-1.38511	Down	1	SLC16A1	3	K08179|1|0.0|951|hsa:6566|MFS transporter, MCP family, solute carrier family 16 (monocarboxylic acid transporters), member 1	GO:0031224//intrinsic component of membrane;GO:0043231//intracellular membrane-bounded organelle;GO:0031224//intrinsic component of membrane;GO:0043231//intracellular membrane-bounded organelle	GO:0005488//binding;GO:0015291//secondary active transmembrane transporter activity;GO:0008028//monocarboxylic acid transmembrane transporter activity;GO:0005488//binding;GO:0015291//secondary active transmembrane transporter activity;GO:0008028//monocarboxylic acid transmembrane transporter activity	GO:0032787//monocarboxylic acid metabolic process;GO:0006820//anion transport;GO:0002376//immune system process;GO:0007599//hemostasis;GO:0015718//monocarboxylic acid transport;GO:0032787//monocarboxylic acid metabolic process;GO:0006820//anion transport;GO:0002376//immune system process;GO:0007599//hemostasis;GO:0015718//monocarboxylic acid transport	gi|115583685|ref|NP_003042.3|/0/monocarboxylate transporter 1 [Homo sapiens]
60598	2550	5.3325	2.0425	-1.38448	Down	0.999566	KCNK15	3	K04923|1|5e-168|594|hsa:60598|potassium channel subfamily K member 15	GO:0031224//intrinsic component of membrane	GO:0005261//cation channel activity	GO:0030001//metal ion transport	gi|333440483|ref|NP_071753.2|/3.98764e-167/potassium channel subfamily K member 15 precursor [Homo sapiens]
4192	873.92	204.19	78.27	-1.38338	Down	1	MDK	1	K06828|1|4e-56|220|rro:104668390|midkine	-	GO:0005539//glycosaminoglycan binding;GO:0005102//receptor binding;GO:0005539//glycosaminoglycan binding;GO:0005102//receptor binding;GO:0005539//glycosaminoglycan binding;GO:0005102//receptor binding;GO:0005539//glycosaminoglycan binding;GO:0005102//receptor binding;GO:0005539//glycosaminoglycan binding;GO:0005102//receptor binding;GO:0005539//glycosaminoglycan binding;GO:0005102//receptor bindi…	GO:0048522;GO:0006950//response to stress;GO:0035270//endocrine system development;GO:0023052//signaling;GO:0048869//cellular developmental process;GO:0048522;GO:0006950//response to stress;GO:0035270//endocrine system development;GO:0023052//signaling;GO:0048869//cellular developmental process;GO:0048522;GO:0006950//response to stress;GO:0035270//endocrine system development;GO:0023052//signalin…	gi|724862493|ref|XP_010369368.1|/2.64908e-100/PREDICTED: midkine isoform X1 [Rhinopithecus roxellana]
596	6492	1.5375	0.59	-1.3818	Down	0.994622	BCL2	2	K02161|1|6e-108|393|mcc:707407|apoptosis regulator Bcl-2	GO:0031966//mitochondrial membrane;GO:0031224//intrinsic component of membrane;GO:0005635//nuclear envelope;GO:0031966//mitochondrial membrane;GO:0031224//intrinsic component of membrane;GO:0005635//nuclear envelope	GO:0051400//BH domain binding;GO:0019903//protein phosphatase binding;GO:0042802//identical protein binding;GO:0046983//protein dimerization activity;GO:0003677//DNA binding;GO:0051400//BH domain binding;GO:0019903//protein phosphatase binding;GO:0042802//identical protein binding;GO:0046983//protein dimerization activity;GO:0003677//DNA binding	GO:0001894//tissue homeostasis;GO:0014074//response to purine-containing compound;GO:0001934//positive regulation of protein phosphorylation;GO:0035264//multicellular organism growth;GO:0051384//response to glucocorticoid;GO:0002244//hematopoietic progenitor cell differentiation;GO:0048754//branching morphogenesis of an epithelial tube;GO:0016567//protein ubiquitination;GO:0007409//axonogenesis;G…	gi|589962382|ref|XP_006993748.1|/1.03512e-103/PREDICTED: apoptosis regulator Bcl-2 [Peromyscus maniculatus bairdii]
5836	2859	16.3775	6.2975	-1.37886	Down	0.999657	PYGL	4	K00688|1|0.0|1649|pps:100974882|starch phosphorylase [EC:2.4.1.1]	GO:0044444//cytoplasmic part;GO:0044444//cytoplasmic part	GO:0002054;GO:0048029//monosaccharide binding;GO:0042802//identical protein binding;GO:0005496//steroid binding;GO:0004645//phosphorylase activity;GO:0048037//cofactor binding;GO:0032559//adenyl ribonucleotide binding;GO:0002054;GO:0048029//monosaccharide binding;GO:0042802//identical protein binding;GO:0005496//steroid binding;GO:0004645//phosphorylase activity;GO:0048037//cofactor binding;GO:00…	GO:0019318//hexose metabolic process;GO:0046390//ribose phosphate biosynthetic process;GO:0005977//glycogen metabolic process;GO:0033500//carbohydrate homeostasis;GO:0019318//hexose metabolic process;GO:0046390//ribose phosphate biosynthetic process;GO:0005977//glycogen metabolic process;GO:0033500//carbohydrate homeostasis	gi|255653002|ref|NP_001157412.1|/0/glycogen phosphorylase, liver form isoform 2 [Homo sapiens]
23089	6628	3.07	1.1975	-1.35821	Down	0.999106	PEG10	1	K10798|1|3e-25|121|dre:558045|poly [ADP-ribose] polymerase [EC:2.4.2.30];K08103|2|4e-11|74.7|ola:101158495|heparan sulfate 6-O-sulfotransferase HS6ST3 [EC:2.8.2.-];K18438|3|4e-11|74.7|gja:107119131|cAMP and cAMP-inhibited cGMP 3',5'-cyclic phosphodiesterase 10 [EC:3.1.4.17 3.1.4.35]	GO:0043231//intracellular membrane-bounded organelle;GO:0043231//intracellular membrane-bounded organelle;GO:0043231//intracellular membrane-bounded organelle;GO:0043231//intracellular membrane-bounded organelle;GO:0043231//intracellular membrane-bounded organelle	GO:0046914//transition metal ion binding;GO:0003676//nucleic acid binding;GO:0046914//transition metal ion binding;GO:0003676//nucleic acid binding;GO:0046914//transition metal ion binding;GO:0003676//nucleic acid binding;GO:0046914//transition metal ion binding;GO:0003676//nucleic acid binding;GO:0046914//transition metal ion binding;GO:0003676//nucleic acid binding	GO:0012501//programmed cell death;GO:0048869//cellular developmental process;GO:0007179//transforming growth factor beta receptor signaling pathway;GO:0012501//programmed cell death;GO:0048869//cellular developmental process;GO:0007179//transforming growth factor beta receptor signaling pathway;GO:0012501//programmed cell death;GO:0048869//cellular developmental process;GO:0007179//transforming g…	gi|289176996|ref|NP_001165908.1|/0/retrotransposon-derived protein PEG10 isoform 3 [Homo sapiens]
64761	3824	5.015	1.9625	-1.35356	Down	0.998725	PARP12	1	K15259|1|0.0|834|ggo:101153976|poly [ADP-ribose] polymerase 7/11/12/13 [EC:2.4.2.30]	GO:0043231//intracellular membrane-bounded organelle;GO:0043231//intracellular membrane-bounded organelle	GO:0046914//transition metal ion binding;GO:0016763//transferase activity, transferring pentosyl groups;GO:0046914//transition metal ion binding;GO:0016763//transferase activity, transferring pentosyl groups	-	gi|426358169|ref|XP_004046393.1|/0/PREDICTED: LOW QUALITY PROTEIN: poly [ADP-ribose] polymerase 12 [Gorilla gorilla gorilla]
3601	1657	1.52	0.5975	-1.34706	Down	0.99738	IL15RA	1	K05074|1|2e-124|449|hsa:3601|interleukin 15 receptor alpha	GO:0044421;GO:0005635//nuclear envelope;GO:0012506//vesicle membrane;GO:0031224//intrinsic component of membrane;GO:0031224//intrinsic component of membrane;GO:0012506//vesicle membrane;GO:0005635//nuclear envelope;GO:0044421;GO:0044421;GO:0005635//nuclear envelope;GO:0012506//vesicle membrane;GO:0031224//intrinsic component of membrane;GO:0044421;GO:0005635//nuclear envelope;GO:0012506//vesicle …	GO:0005488//binding;GO:0004888//transmembrane signaling receptor activity;GO:0005488//binding;GO:0004888//transmembrane signaling receptor activity;GO:0005488//binding;GO:0004888//transmembrane signaling receptor activity;GO:0005488//binding;GO:0004888//transmembrane signaling receptor activity;GO:0005488//binding;GO:0004888//transmembrane signaling receptor activity	GO:0007166//cell surface receptor signaling pathway;GO:0001779//natural killer cell differentiation;GO:0007166//cell surface receptor signaling pathway;GO:0007166//cell surface receptor signaling pathway;GO:0007166//cell surface receptor signaling pathway;GO:0007166//cell surface receptor signaling pathway	gi|332833539|ref|XP_001146125.2|/2.69462e-131/PREDICTED: interleukin-15 receptor subunit alpha isoform X2 [Pan troglodytes]
24147	2701	3.9225	1.55	-1.33951	Down	1	FJX1	3	K16674|1|0.0|716|hsa:24147|four-jointed box protein 1	GO:0044421	-	-	gi|829920954|ref|XP_012594216.1|/0/PREDICTED: LOW QUALITY PROTEIN: four-jointed box protein 1 [Microcebus murinus]
84985	4298.12	1.9125	0.7575	-1.33614	Down	0.987504	FAM83A	2	K16805|1|3e-39|167|gga:425103|protein FAM83D	-	-	-	gi|40254997|ref|NP_116288.2|/0/protein FAM83A isoform a [Homo sapiens]
645638	621	1.215	0.4825	-1.33236	Down	0.885861	WFDC21P	1	-	GO:0044421	GO:0008047//enzyme activator activity	GO:0045444//fat cell differentiation;GO:0002237//response to molecule of bacterial origin;GO:0034097//response to cytokine	gi|426347279|ref|XP_004041282.1|/3.00311e-20/PREDICTED: extracellular peptidase inhibitor-like [Gorilla gorilla gorilla]
5236	2487	3.7275	1.4825	-1.33018	Down	0.998585	PGM1	1	K01835|1|0.0|1034|hsa:5236|phosphoglucomutase [EC:5.4.2.2]	GO:0044444//cytoplasmic part;GO:0044444//cytoplasmic part;GO:0044444//cytoplasmic part	GO:0016868//intramolecular transferase activity, phosphotransferases;GO:0046872//metal ion binding;GO:0016868//intramolecular transferase activity, phosphotransferases;GO:0046872//metal ion binding;GO:0016868//intramolecular transferase activity, phosphotransferases	GO:0006012//galactose metabolic process;GO:0006875//cellular metal ion homeostasis;GO:0006006//glucose metabolic process;GO:0005977//glycogen metabolic process;GO:0006012//galactose metabolic process;GO:0006875//cellular metal ion homeostasis;GO:0006006//glucose metabolic process;GO:0005977//glycogen metabolic process;GO:0006012//galactose metabolic process;GO:0006875//cellular metal ion homeosta…	gi|60551975|gb|AAH90856.1|/0/PGM1 protein, partial [Homo sapiens]
624	4197	2.105	0.84	-1.32536	Down	0.992096	BDKRB2	3	K03916|1|0.0|772|hsa:624|bradykinin receptor B2	GO:0043231//intracellular membrane-bounded organelle;GO:0016021//integral component of membrane	GO:0004629//phospholipase C activity;GO:0031701//angiotensin receptor binding;GO:0046983//protein dimerization activity;GO:0008528//G-protein coupled peptide receptor activity;GO:0019899//enzyme binding	GO:0042221//response to chemical;GO:0015909//long-chain fatty acid transport;GO:0008283//cell proliferation;GO:0006936//muscle contraction;GO:0042310//vasoconstriction;GO:0007167//enzyme linked receptor protein signaling pathway;GO:0051480//regulation of cytosolic calcium ion concentration;GO:0001933//negative regulation of protein phosphorylation;GO:0006970//response to osmotic stress;GO:0006915…	gi|4557359|ref|NP_000614.1|/0/B2 bradykinin receptor [Homo sapiens]
692091	110	4.5225	1.825	-1.30922	Down	0.992931	SNORD23	1	-	GO:0031981//nuclear lumen	-	-	gi|7512539|pir||T34536/3.89742e-15/hypothetical protein DKFZp434C031.1 - human (fragment)
100289361	640	1.6975	0.6875	-1.30398	Down	0.999925	LOC100289361	1	-	-	-	-	-
7378	1486.82	1.085	0.44	-1.30212	Down	0.994967	UPP1	1	K00757|1|2e-87|325|nle:100607708|uridine phosphorylase [EC:2.4.2.3]	GO:0044444//cytoplasmic part;GO:0044444//cytoplasmic part;GO:0044444//cytoplasmic part;GO:0044444//cytoplasmic part;GO:0044444//cytoplasmic part;GO:0044444//cytoplasmic part	GO:0016763//transferase activity, transferring pentosyl groups;GO:0016763//transferase activity, transferring pentosyl groups;GO:0016763//transferase activity, transferring pentosyl groups;GO:0016763//transferase activity, transferring pentosyl groups;GO:0016763//transferase activity, transferring pentosyl groups;GO:0016763//transferase activity, transferring pentosyl groups	GO:0008655//pyrimidine-containing compound salvage;GO:0009112;GO:0046131;GO:0009117//nucleotide metabolic process;GO:0008655//pyrimidine-containing compound salvage;GO:0009112;GO:0046131;GO:0009117//nucleotide metabolic process;GO:0008655//pyrimidine-containing compound salvage;GO:0009112;GO:0046131;GO:0009117//nucleotide metabolic process;GO:0008655//pyrimidine-containing compound salvage;GO:000…	gi|4507839|ref|NP_003355.1|/2.47105e-167/uridine phosphorylase 1 isoform a [Homo sapiens]
134	2847.37	5.63	2.2875	-1.29936	Down	0.999421	ADORA1	2	K04265|1|6e-142|507|ggo:101140567|adenosine A1 receptor	GO:0033267;GO:0032589//neuron projection membrane;GO:0044430;GO:0043231//intracellular membrane-bounded organelle;GO:0044456;GO:0016021//integral component of membrane;GO:0044297//cell body;GO:0033267;GO:0032589//neuron projection membrane;GO:0044430;GO:0043231//intracellular membrane-bounded organelle;GO:0044456;GO:0016021//integral component of membrane;GO:0044297//cell body	GO:0001882//nucleoside binding;GO:0004620//phospholipase activity;GO:0005102//receptor binding;GO:0004930//G-protein coupled receptor activity;GO:0032403//protein complex binding;GO:0046983//protein dimerization activity;GO:0001882//nucleoside binding;GO:0004620//phospholipase activity;GO:0005102//receptor binding;GO:0004930//G-protein coupled receptor activity;GO:0032403//protein complex binding…	GO:0045986//negative regulation of smooth muscle contraction;GO:0048871//multicellular organismal homeostasis;GO:0002790//peptide secretion;GO:0032898;GO:0006470//protein dephosphorylation;GO:0035588;GO:0042321//negative regulation of circadian sleep/wake cycle, sleep;GO:0050961//detection of temperature stimulus involved in sensory perception;GO:0031348//negative regulation of defense response;G…	gi|4501947|ref|NP_000665.1|/5.79277e-141/adenosine receptor A1 [Homo sapiens]
51177	2145	5.045	2.05	-1.29923	Down	0.99986	PLEKHO1	1	-	GO:0043231//intracellular membrane-bounded organelle;GO:0016020//membrane;GO:0043231//intracellular membrane-bounded organelle;GO:0016020//membrane;GO:0043231//intracellular membrane-bounded organelle;GO:0016020//membrane;GO:0043231//intracellular membrane-bounded organelle;GO:0016020//membrane	-	-	gi|119573966|gb|EAW53581.1|/0/pleckstrin homology domain containing, family O member 1, isoform CRA_b, partial [Homo sapiens]
6648	3411.41	41.0825	16.705	-1.29824	Down	0.994414	SOD2	1	K04564|1|3e-125|452|hsa:6648|superoxide dismutase, Fe-Mn family [EC:1.15.1.1]	GO:0019866//organelle inner membrane;GO:0044429;GO:0019866//organelle inner membrane;GO:0044429;GO:0019866//organelle inner membrane;GO:0044429;GO:0019866//organelle inner membrane;GO:0044429;GO:0044429;GO:0019866//organelle inner membrane;GO:0044429;GO:0019866//organelle inner membrane;GO:0044429;GO:0019866//organelle inner membrane;GO:0044429;GO:0019866//organelle inner membrane;GO:0044429	GO:0046914//transition metal ion binding;GO:0016209//antioxidant activity;GO:0003824//catalytic activity;GO:0046914//transition metal ion binding;GO:0016209//antioxidant activity;GO:0003824//catalytic activity;GO:0046914//transition metal ion binding;GO:0016209//antioxidant activity;GO:0003824//catalytic activity;GO:0046914//transition metal ion binding;GO:0016209//antioxidant activity;GO:0003824…	GO:0003068;GO:0008637//apoptotic mitochondrial changes;GO:0009611//response to wounding;GO:0033483;GO:0045596//negative regulation of cell differentiation;GO:0055080//cation homeostasis;GO:0006355//regulation of transcription, DNA-templated;GO:0048534//hematopoietic or lymphoid organ development;GO:0031328//positive regulation of cellular biosynthetic process;GO:0048468//cell development;GO:00229…	gi|67782305|ref|NP_000627.2|/2.52096e-124/superoxide dismutase [Mn], mitochondrial isoform A precursor [Homo sapiens]
7054	1817	1.5	0.61	-1.29808	Down	0.997464	TH	2	K00501|1|0.0|992|hsa:7054|tyrosine 3-monooxygenase [EC:1.14.16.2]	GO:0030659//cytoplasmic vesicle membrane;GO:0043025//neuronal cell body;GO:0033267;GO:0005783//endoplasmic reticulum;GO:0030136//clathrin-coated vesicle;GO:0044459;GO:0030659//cytoplasmic vesicle membrane;GO:0043025//neuronal cell body;GO:0033267;GO:0005783//endoplasmic reticulum;GO:0030136//clathrin-coated vesicle;GO:0044459;GO:0030659//cytoplasmic vesicle membrane;GO:0043025//neuronal cell body…	GO:0043176//amine binding;GO:0016714//oxidoreductase activity, acting on paired donors, with incorporation or reduction of molecular oxygen, reduced pteridine as one donor, and incorporation of one atom of oxygen;GO:0031406//carboxylic acid binding;GO:0050662//coenzyme binding;GO:0005506//iron ion binding;GO:0043176//amine binding;GO:0016714//oxidoreductase activity, acting on paired donors, with…	GO:0048048//embryonic eye morphogenesis;GO:0007611//learning or memory;GO:0007618//mating;GO:0042415//norepinephrine metabolic process;GO:0050953//sensory perception of light stimulus;GO:0044057;GO:0042417//dopamine metabolic process;GO:0006570//tyrosine metabolic process;GO:0009058//biosynthetic process;GO:0042414//epinephrine metabolic process;GO:0042133//neurotransmitter metabolic process;GO:0…	gi|88900503|ref|NP_000351.2|/0/tyrosine 3-monooxygenase isoform b [Homo sapiens]
10622	3285	5.375	2.1975	-1.2904	Down	1	POLR3G	2	K03024|1|2e-58|230|ptr:461759|DNA-directed RNA polymerase III subunit RPC7	GO:0044451	-	GO:0006355//regulation of transcription, DNA-templated;GO:0031349//positive regulation of defense response;GO:0032481//positive regulation of type I interferon production	gi|767935195|ref|XP_011541408.1|/3.13236e-58/PREDICTED: DNA-directed RNA polymerase III subunit RPC7 isoform X4 [Homo sapiens]
23657	9648	5.4375	2.23	-1.2859	Down	0.998903	SLC7A11	3	K13869|1|0.0|950|nle:100581045|solute carrier family 7 (L-type amino acid transporter), member 11	GO:0031224//intrinsic component of membrane	GO:0005294	GO:0007599//hemostasis;GO:0002376//immune system process;GO:0006865//amino acid transport;GO:0042221//response to chemical;GO:0006807//nitrogen compound metabolic process	gi|332231062|ref|XP_003264716.1|/0/PREDICTED: cystine/glutamate transporter isoform X1 [Nomascus leucogenys]
51704	2941	1.0475	0.43	-1.28454	Down	0.994337	GPRC5B	2	K04619|1|0.0|712|mcf:102146152|G protein-coupled receptor family C group 5 member B	-	-	-	gi|755571572|ref|NP_001291700.1|/0/G-protein coupled receptor family C group 5 member B isoform 2 [Homo sapiens]
1958	3136	3.0175	1.2525	-1.26854	Down	0.989099	EGR1	2	K09203|1|0.0|827|ggo:101153225|early growth response protein 1	GO:0043231//intracellular membrane-bounded organelle	GO:0001071//nucleic acid binding transcription factor activity;GO:0046872//metal ion binding;GO:0003677//DNA binding	GO:0072126//positive regulation of glomerular mesangial cell proliferation;GO:0019221//cytokine-mediated signaling pathway;GO:0071398//cellular response to fatty acid;GO:0016925//protein sumoylation	gi|635123918|ref|XP_008012755.1|/0/PREDICTED: early growth response protein 1 [Chlorocebus sabaeus]
8626	4615.94	1.505	0.635	-1.24493	Down	0.994019	TP63	1	K10149|1|0.0|1345|hsa:8626|tumor protein p63	GO:0031981//nuclear lumen;GO:0043005//neuron projection;GO:0043234//protein complex;GO:0044444//cytoplasmic part;GO:0044427;GO:0031981//nuclear lumen;GO:0043005//neuron projection;GO:0043234//protein complex;GO:0044444//cytoplasmic part;GO:0044427;GO:0031981//nuclear lumen;GO:0043005//neuron projection;GO:0043234//protein complex;GO:0044444//cytoplasmic part;GO:0044427;GO:0031981//nuclear lumen;G…	GO:0001071//nucleic acid binding transcription factor activity;GO:0043566//structure-specific DNA binding;GO:0005515//protein binding;GO:0043565//sequence-specific DNA binding;GO:0043169//cation binding;GO:0001071//nucleic acid binding transcription factor activity;GO:0043566//structure-specific DNA binding;GO:0005515//protein binding;GO:0043565//sequence-specific DNA binding;GO:0043169//cation b…	GO:0008284//positive regulation of cell proliferation;GO:0048232//male gamete generation;GO:0001942//hair follicle development;GO:0001738//morphogenesis of a polarized epithelium;GO:0007569//cell aging;GO:0051260//protein homooligomerization;GO:0042476//odontogenesis;GO:0009411//response to UV;GO:0008630//intrinsic apoptotic signaling pathway in response to DNA damage;GO:0048730//epidermis morpho…	gi|803004005|ref|XP_004003091.2|/0/PREDICTED: tumor protein 63 isoform X2 [Ovis aries]
339983	5894	1.7	0.7175	-1.24448	Down	0.999721	NAT8L	3	K18309|1|9e-104|382|hsa:339983|aspartate N-acetyltransferase [EC:2.3.1.17]	GO:0005740//mitochondrial envelope;GO:0031090//organelle membrane;GO:0044425	GO:0008080//N-acetyltransferase activity	-	gi|635138915|ref|XP_008016313.1|/4.75537e-124/PREDICTED: LOW QUALITY PROTEIN: putative uncharacterized protein FLJ22184 [Chlorocebus sabaeus]
406941	89	1.2175	0.515	-1.24128	Down	0.869422	MIR149	1	-	-	-	-	-
102465466	66	2.1625	0.9175	-1.23692	Down	0.946509	MIR6777	1	-	-	-	-	-
10280	1620.5	17.7625	7.55	-1.23429	Down	1	SIGMAR1	1	K11997|1|8e-08|61.2|bfo:BRAFLDRAFT_83265|tripartite motif-containing protein 2/3	GO:0031965//nuclear membrane;GO:0016021//integral component of membrane;GO:0019866//organelle inner membrane;GO:0044459;GO:0044444//cytoplasmic part;GO:0030427//site of polarized growth;GO:0031965//nuclear membrane;GO:0016021//integral component of membrane;GO:0019866//organelle inner membrane;GO:0044459;GO:0044444//cytoplasmic part;GO:0030427//site of polarized growth;GO:0031965//nuclear membran…	GO:0016863//intramolecular oxidoreductase activity, transposing C=C bonds;GO:0008528//G-protein coupled peptide receptor activity;GO:0016863//intramolecular oxidoreductase activity, transposing C=C bonds;GO:0008528//G-protein coupled peptide receptor activity;GO:0016863//intramolecular oxidoreductase activity, transposing C=C bonds;GO:0008528//G-protein coupled peptide receptor activity;GO:000852…	GO:0048731//system development;GO:0008204//ergosterol metabolic process;GO:0010876//lipid localization;GO:0051234//establishment of localization;GO:0048731//system development;GO:0008204//ergosterol metabolic process;GO:0010876//lipid localization;GO:0051234//establishment of localization;GO:0048731//system development;GO:0007186//G-protein coupled receptor signaling pathway;GO:0008204//ergostero…	gi|5032117|ref|NP_005857.1|/6.78854e-97/sigma non-opioid intracellular receptor 1 isoform 1 [Homo sapiens]
101559451	472	1.735	0.7375	-1.23422	Down	0.998007	LOC101559451	1	-	-	-	-	-
106144538	734	3.5225	1.4975	-1.23404	Down	0.99565	KCNK15-AS1	1	K04923|1|2e-36|154|hsa:60598|potassium channel subfamily K member 15	GO:0031224//intrinsic component of membrane	GO:0005261//cation channel activity	GO:0030001//metal ion transport	gi|24636282|sp|Q9H427.2|KCNKF_HUMAN/2.55962e-36/RecName: Full=Potassium channel subfamily K member 15; AltName: Full=Acid-sensitive potassium channel protein TASK-5; AltName: Full=TWIK-related acid-sensitive K(+) channel 5; AltName: Full=Two pore potassium channel KT3.3; Short=Two pore K(+) channel KT3.3
692201	86	60.5425	25.835	-1.22862	Down	0.999555	SNORD86	1	-	-	-	-	-
197259	2779	9.3525	4	-1.22535	Down	1	MLKL	3	K08849|1|0.0|900|hsa:197259|mixed lineage kinase domain-like [EC:2.7.11.1]	-	GO:0016301//kinase activity;GO:0032559//adenyl ribonucleotide binding;GO:0016301//kinase activity;GO:0032559//adenyl ribonucleotide binding	GO:0006464//cellular protein modification process;GO:0006464//cellular protein modification process	gi|215820622|ref|NP_001135969.1|/2.125e-134/mixed lineage kinase domain-like protein isoform 2 [Homo sapiens]
56649	3534	1.5425	0.66	-1.22473	Down	0.996175	TMPRSS4	1	K09635|1|0.0|796|hsa:56649|transmembrane protease serine 4 [EC:3.4.21.-]	GO:0031224//intrinsic component of membrane;GO:0031224//intrinsic component of membrane;GO:0031224//intrinsic component of membrane;GO:0031224//intrinsic component of membrane;GO:0031224//intrinsic component of membrane;GO:0031224//intrinsic component of membrane;GO:0031224//intrinsic component of membrane	GO:0004175//endopeptidase activity;GO:0004888//transmembrane signaling receptor activity;GO:0004175//endopeptidase activity;GO:0004888//transmembrane signaling receptor activity;GO:0004175//endopeptidase activity;GO:0004888//transmembrane signaling receptor activity;GO:0004175//endopeptidase activity;GO:0004888//transmembrane signaling receptor activity;GO:0004175//endopeptidase activity;GO:00048…	GO:0019538//protein metabolic process;GO:0019538//protein metabolic process;GO:0019538//protein metabolic process;GO:0019538//protein metabolic process;GO:0019538//protein metabolic process;GO:0019538//protein metabolic process;GO:0019538//protein metabolic process	gi|291167777|ref|NP_001167023.1|/0/transmembrane protease serine 4 isoform 5 [Homo sapiens]
3481	4539	1.125	0.4825	-1.22132	Down	0.902786	IGF2	2	K13769|1|4e-83|313|pps:100968468|insulin-like growth factor 2	GO:0044421;GO:0044421;GO:0044421;GO:0044421	GO:0005102//receptor binding;GO:0005102//receptor binding;GO:0005102//receptor binding;GO:0005102//receptor binding	GO:0009653//anatomical structure morphogenesis;GO:0031016//pancreas development;GO:0006355//regulation of transcription, DNA-templated;GO:0008283//cell proliferation;GO:0001503//ossification;GO:0007169//transmembrane receptor protein tyrosine kinase signaling pathway;GO:0007088//regulation of mitotic nuclear division;GO:0019318//hexose metabolic process;GO:0040029//regulation of gene expression, …	gi|189083846|ref|NP_001121070.1|/1.38029e-83/insulin-like growth factor II isoform 2 [Homo sapiens]
654364	1109.52	37.335	16.0525	-1.21773	Down	1	NME1-NME2	1	K00940|1|8e-154|545|hsa:654364|nucleoside-diphosphate kinase [EC:2.7.4.6]	GO:0043231//intracellular membrane-bounded organelle;GO:0031252//cell leading edge;GO:0044444//cytoplasmic part;GO:0043231//intracellular membrane-bounded organelle;GO:0031252//cell leading edge;GO:0044444//cytoplasmic part	GO:0004672//protein kinase activity;GO:0001071//nucleic acid binding transcription factor activity;GO:0003676//nucleic acid binding;GO:0032559//adenyl ribonucleotide binding;GO:0043169//cation binding;GO:0016776//phosphotransferase activity, phosphate group as acceptor;GO:0004672//protein kinase activity;GO:0001071//nucleic acid binding transcription factor activity;GO:0003676//nucleic acid bindi…	GO:0006351//transcription, DNA-templated;GO:0009209;GO:0030858//positive regulation of epithelial cell differentiation;GO:0008284//positive regulation of cell proliferation;GO:0006915//apoptotic process;GO:0009206;GO:0009132//nucleoside diphosphate metabolic process;GO:0006351//transcription, DNA-templated;GO:0009209;GO:0030858//positive regulation of epithelial cell differentiation;GO:0008284//p…	gi|79160090|gb|AAI07895.1|/2.77802e-154/NME1-NME2 protein [Homo sapiens]
7345	1141	2.615	1.1275	-1.21368	Down	0.998804	UCHL1	4	K05611|1|1e-115|419|pon:100440914|ubiquitin carboxyl-terminal hydrolase L1 [EC:3.4.19.12]	GO:0031981//nuclear lumen;GO:0043005//neuron projection;GO:0016020//membrane;GO:0044297//cell body;GO:0044444//cytoplasmic part	GO:0032182//ubiquitin-like protein binding;GO:0004175//endopeptidase activity;GO:0008238//exopeptidase activity;GO:0016790//thiolester hydrolase activity;GO:0031690//adrenergic receptor binding	GO:0007154//cell communication;GO:0043405//regulation of MAP kinase activity;GO:0050877//neurological system process;GO:0008088//axo-dendritic transport;GO:0019941//modification-dependent protein catabolic process;GO:0007631//feeding behavior;GO:0070646//protein modification by small protein removal;GO:0008344//adult locomotory behavior	gi|635137765|ref|XP_008015745.1|/1.25739e-128/PREDICTED: ubiquitin carboxyl-terminal hydrolase isozyme L1 [Chlorocebus sabaeus]
145978	1786	5.0325	2.1775	-1.2086	Down	0.997389	LINC00052	1	-	-	-	-	gi|119622391|gb|EAX01986.1|/3.98363e-43/transmembrane protein 83 [Homo sapiens]
57559	2094	1.2525	0.5425	-1.20712	Down	0.995218	STAMBPL1	3	K11867|1|0.0|840|pps:100988185|AMSH-like protease [EC:3.4.19.12]	-	GO:0070011//peptidase activity, acting on L-amino acid peptides;GO:0043169//cation binding	-	gi|33147080|ref|NP_065850.1|/0/AMSH-like protease [Homo sapiens]
692109	77	3.7975	1.6475	-1.20477	Down	0.965556	SNORD69	1	-	-	-	-	-
2161	2060	1.8875	0.8225	-1.19839	Down	0.998562	F12	3	K01328|1|0.0|1211|hsa:2161|coagulation factor XII (Hageman factor) [EC:3.4.21.38]	GO:0016020//membrane;GO:0044421	GO:0004175//endopeptidase activity;GO:0005515//protein binding	GO:0002353//plasma kallikrein-kinin cascade;GO:0010755//regulation of plasminogen activation;GO:0030195//negative regulation of blood coagulation	gi|145275213|ref|NP_000496.2|/0/coagulation factor XII preproprotein [Homo sapiens]
90161	4471.94	4.675	2.04	-1.1964	Down	0.994129	HS6ST2	1	K08102|1|0.0|1059|pps:100978573|heparan sulfate 6-O-sulfotransferase HS6ST2 [EC:2.8.2.-]	GO:0031224//intrinsic component of membrane	GO:0016782//transferase activity, transferring sulfur-containing groups	GO:0005975//carbohydrate metabolic process	gi|116295256|ref|NP_001070656.1|/0/heparan-sulfate 6-O-sulfotransferase 2 isoform L [Homo sapiens]
100874249	564	4.4725	1.955	-1.19391	Down	0.997365	DENND5B-AS1	1	K09228|1|8e-07|55.5|ptr:469069|KRAB domain-containing zinc finger protein	-	-	-	gi|635139244|ref|XP_008016462.1|/6.60308e-12/PREDICTED: general transcription factor II-I repeat domain-containing protein 1-like isoform X2 [Chlorocebus sabaeus]
84842	1803	3.0025	1.3125	-1.19385	Down	0.997375	HPDL	2	K00457|1|1e-25|120|tad:TRIADDRAFT_58263|4-hydroxyphenylpyruvate dioxygenase [EC:1.13.11.27]	-	GO:0016702//oxidoreductase activity, acting on single donors with incorporation of molecular oxygen, incorporation of two atoms of oxygen;GO:0043169//cation binding	GO:0006520//cellular amino acid metabolic process	gi|14249394|ref|NP_116145.1|/0/4-hydroxyphenylpyruvate dioxygenase-like protein [Homo sapiens]
3226	2017	1.035	0.4525	-1.19364	Down	0.998514	HOXC10	3	K17444|1|0.0|668|hsa:3226|homrobox protein Hox-C10	GO:0043231//intracellular membrane-bounded organelle;GO:0043234//protein complex	GO:0001071//nucleic acid binding transcription factor activity;GO:0003677//DNA binding	GO:0003002//regionalization;GO:0021522//spinal cord motor neuron differentiation;GO:0035108//limb morphogenesis;GO:0006351//transcription, DNA-templated;GO:0008283//cell proliferation;GO:0050877//neurological system process	gi|24497533|ref|NP_059105.2|/0/homeobox protein Hox-C10 [Homo sapiens]
54749	2343.24	3.66	1.605	-1.18927	Down	0.999009	EPDR1	4	-	GO:0000323//lytic vacuole;GO:0000323//lytic vacuole;GO:0000323//lytic vacuole	GO:0046872//metal ion binding;GO:0046872//metal ion binding	GO:0031589//cell-substrate adhesion;GO:0031589//cell-substrate adhesion;GO:0031589//cell-substrate adhesion	gi|51094735|gb|EAL23982.1|/2.38051e-89/upregulated in colorectal cancer gene 1 [Homo sapiens]
124976	3459	3.215	1.41	-1.18912	Down	0.999012	SPNS2	2	K20225|1|0.0|764|acs:103282837|capicua transcriptional repressor	GO:0031224//intrinsic component of membrane	-	GO:0006810//transport;GO:0010876//lipid localization	gi|918625479|ref|XP_013377602.1|/0/PREDICTED: protein spinster homolog 2 isoform X1 [Chinchilla lanigera]
619570	63	5.7925	2.5425	-1.18794	Down	0.975657	SNORD95	1	-	-	-	-	-
10360	904	23.9775	10.545	-1.18512	Down	1	NPM3	2	K11278|1|1e-78|295|mcf:102142301|nucleophosmin 3	GO:0043231//intracellular membrane-bounded organelle	GO:0005488//binding	-	gi|635055806|ref|XP_007962117.1|/4.75166e-79/PREDICTED: nucleoplasmin-3 [Chlorocebus sabaeus]
283248	2621	1.045	0.46	-1.1838	Down	0.995838	RCOR2	3	K11829|1|1e-109|400|gga:428911|REST corepressor 1	GO:0044427;GO:0043234//protein complex;GO:0043231//intracellular membrane-bounded organelle	GO:0003676//nucleic acid binding;GO:0003712//transcription cofactor activity;GO:0001071//nucleic acid binding transcription factor activity	-	gi|533139977|ref|XP_005384714.1|/0/PREDICTED: REST corepressor 2 isoform X2 [Chinchilla lanigera]
1263	2513	1.0375	0.4575	-1.18127	Down	0.998773	PLK3	3	K08862|1|0.0|1181|ptr:456546|polo-like kinase 3 [EC:2.7.11.21]	GO:0043005//neuron projection	GO:0004672//protein kinase activity;GO:0032559//adenyl ribonucleotide binding	GO:0006464//cellular protein modification process	gi|694885604|ref|XP_009454509.1|/0/PREDICTED: serine/threonine-protein kinase PLK3 [Pan troglodytes]
100128881	1753	17.5425	7.7425	-1.17998	Down	1	VPS9D1-AS1	1	K10377|1|1e-07|58.9|fpg:101924230|syncoilin 1;K15297|5|2e-07|60.1|tru:101071594|regulating synaptic membrane exocytosis protein 2	-	-	-	gi|119587100|gb|EAW66696.1|/1.50773e-51/chromosome 16 open reading frame 7, isoform CRA_c [Homo sapiens]
113220	2024	10.5225	4.65	-1.17817	Down	0.997515	KIF12	1	K10399|1|0.0|944|ggo:101136412|kinesin family member 12	-	-	-	gi|119607814|gb|EAW87408.1|/0/kinesin family member 12, isoform CRA_d [Homo sapiens]
140862	2610	1.19	0.5275	-1.17372	Down	0.997388	ISM1	1	K04597|1|3e-06|57.0|shr:100921598|brain-specific angiogenesis inhibitor 2	-	-	-	gi|153791192|ref|NP_543016.1|/0/isthmin-1 precursor [Homo sapiens]
205	6881.03	6.48	2.88	-1.16993	Down	0.999999	AK4	1	K00939|1|3e-97|360|nle:100601608|adenylate kinase [EC:2.7.4.3]	GO:0044429;GO:0044429;GO:0044429;GO:0044429	GO:0019205//nucleobase-containing compound kinase activity;GO:0032561//guanyl ribonucleotide binding;GO:0016776//phosphotransferase activity, phosphate group as acceptor;GO:0032559//adenyl ribonucleotide binding;GO:0019205//nucleobase-containing compound kinase activity;GO:0032561//guanyl ribonucleotide binding;GO:0016776//phosphotransferase activity, phosphate group as acceptor;GO:0032559//adeny…	GO:0009719;GO:0010033//response to organic substance;GO:0009117//nucleotide metabolic process;GO:0006796//phosphate-containing compound metabolic process;GO:0009719;GO:0010033//response to organic substance;GO:0009117//nucleotide metabolic process;GO:0006796//phosphate-containing compound metabolic process;GO:0009719;GO:0010033//response to organic substance;GO:0009117//nucleotide metabolic proce…	gi|594070184|ref|XP_006058980.1|/3.38158e-128/PREDICTED: adenylate kinase 4, mitochondrial [Bubalus bubalis]
102466194	74	2.43	1.08	-1.16993	Down	0.827908	MIR6773	1	-	-	-	-	-
11135	2182	7.5275	3.3525	-1.16693	Down	0.998945	CDC42EP1	2	-	GO:0005856//cytoskeleton;GO:0043231//intracellular membrane-bounded organelle;GO:0016020//membrane	GO:0005488//binding	GO:0065008//regulation of biological quality;GO:0050794//regulation of cellular process;GO:0031269//pseudopodium assembly	gi|829994663|ref|XP_004675734.2|/1.09079e-77/PREDICTED: cdc42 effector protein 1 isoform X1 [Condylura cristata]
57291	855	81.875	36.485	-1.16612	Down	0.999143	DANCR	1	-	-	-	-	gi|119625841|gb|EAX05436.1|/8.28963e-38/hCG2036618, isoform CRA_a [Homo sapiens]
23022	4468.04	19.0025	8.4725	-1.16533	Down	0.999993	PALLD	1	K12567|1|6e-79|299|crg:105342773|titin [EC:2.7.11.1]	GO:0005924//cell-substrate adherens junction;GO:0031252//cell leading edge;GO:0043231//intracellular membrane-bounded organelle;GO:0030016//myofibril;GO:0015629//actin cytoskeleton;GO:0005924//cell-substrate adherens junction;GO:0031252//cell leading edge;GO:0043231//intracellular membrane-bounded organelle;GO:0030016//myofibril;GO:0015629//actin cytoskeleton	GO:0051393//alpha-actinin binding;GO:0051393//alpha-actinin binding	GO:0006996//organelle organization;GO:0006996//organelle organization	gi|767931477|ref|XP_011530076.1|/0/PREDICTED: palladin isoform X8 [Homo sapiens]
6520	1979.87	211.018	94.43	-1.16005	Down	1	SLC3A2	1	K06519|1|2e-140|501|hsa:6520|solute carrier family 3, member 2	GO:0031224//intrinsic component of membrane;GO:0044459;GO:0048770;GO:0031224//intrinsic component of membrane;GO:0044459;GO:0048770;GO:0031224//intrinsic component of membrane;GO:0044459;GO:0048770;GO:0031224//intrinsic component of membrane;GO:0044459;GO:0048770;GO:0031224//intrinsic component of membrane;GO:0044459;GO:0048770	GO:0015081//sodium ion transmembrane transporter activity;GO:0015171//amino acid transmembrane transporter activity;GO:0043167//ion binding;GO:0015081//sodium ion transmembrane transporter activity;GO:0015171//amino acid transmembrane transporter activity;GO:0043167//ion binding;GO:0015081//sodium ion transmembrane transporter activity;GO:0015171//amino acid transmembrane transporter activity;GO:…	GO:0015801//aromatic amino acid transport;GO:0015820//leucine transport;GO:0044238//primary metabolic process;GO:0040007//growth;GO:0002376//immune system process;GO:0006807//nitrogen compound metabolic process;GO:0007599//hemostasis;GO:0070838//divalent metal ion transport;GO:0015801//aromatic amino acid transport;GO:0015820//leucine transport;GO:0044238//primary metabolic process;GO:0040007//gr…	gi|966984599|ref|XP_014969439.1|/0/PREDICTED: 4F2 cell-surface antigen heavy chain [Macaca mulatta]
445	1801	79.3025	35.4975	-1.15965	Down	0.99937	ASS1	4	K01940|1|0.0|854|ptr:743223|argininosuccinate synthase [EC:6.3.4.5]	GO:0043005//neuron projection;GO:0000323//lytic vacuole;GO:0031966//mitochondrial membrane;GO:0043025//neuronal cell body;GO:0043005//neuron projection;GO:0000323//lytic vacuole;GO:0031966//mitochondrial membrane;GO:0043025//neuronal cell body	GO:0032559//adenyl ribonucleotide binding;GO:0016879//ligase activity, forming carbon-nitrogen bonds;GO:0032559//adenyl ribonucleotide binding;GO:0016879//ligase activity, forming carbon-nitrogen bonds	GO:0032496//response to lipopolysaccharide;GO:0060538//skeletal muscle organ development;GO:0006575//cellular modified amino acid metabolic process;GO:0002526//acute inflammatory response;GO:0033762//response to glucagon;GO:0043627//response to estrogen;GO:0034612//response to tumor necrosis factor;GO:0010038//response to metal ion;GO:0006525//arginine metabolic process;GO:0019627//urea metabolic…	gi|767957496|ref|XP_011517007.1|/0/PREDICTED: argininosuccinate synthase isoform X2 [Homo sapiens]
102465134	89	1.7175	0.77	-1.15738	Down	0.832071	MIR6126	1	-	-	-	-	-
4609	2379	53.205	23.89	-1.15515	Down	1	MYC	4	K04377|1|0.0|720|hsa:4609|Myc proto-oncogene protein	GO:0031981//nuclear lumen;GO:0015630//microtubule cytoskeleton	GO:0001071//nucleic acid binding transcription factor activity	GO:0042221//response to chemical;GO:0006355//regulation of transcription, DNA-templated;GO:0022402//cell cycle process;GO:0048754//branching morphogenesis of an epithelial tube;GO:0000723//telomere maintenance;GO:0002053//positive regulation of mesenchymal cell proliferation;GO:0006875//cellular metal ion homeostasis	gi|71774083|ref|NP_002458.2|/0/myc proto-oncogene protein [Homo sapiens]
6536	3124.08	3.04	1.3725	-1.14727	Down	1	SLC6A9	1	K05038|1|0.0|845|ocu:100351167|solute carrier family 6 (neurotransmitter transporter, amino acid) member 5/7/9/14	GO:0016021//integral component of membrane;GO:0016021//integral component of membrane;GO:0016021//integral component of membrane;GO:0016021//integral component of membrane;GO:0016021//integral component of membrane;GO:0016021//integral component of membrane;GO:0016021//integral component of membrane;GO:0016021//integral component of membrane	GO:0005283//sodium:amino acid symporter activity;GO:0005326//neurotransmitter transporter activity;GO:0005283//sodium:amino acid symporter activity;GO:0005326//neurotransmitter transporter activity;GO:0015175//neutral amino acid transmembrane transporter activity;GO:0005283//sodium:amino acid symporter activity;GO:0005326//neurotransmitter transporter activity;GO:0005283//sodium:amino acid sympor…	GO:0015837//amine transport;GO:0015837//amine transport;GO:0015804//neutral amino acid transport;GO:0035725//sodium ion transmembrane transport;GO:0015837//amine transport;GO:0015837//amine transport;GO:0015837//amine transport;GO:0015804//neutral amino acid transport;GO:0035725//sodium ion transmembrane transport;GO:0015837//amine transport	gi|67782317|ref|NP_001020016.1|/0/sodium- and chloride-dependent glycine transporter 1 isoform 3 [Homo sapiens]
8910	1647.49	10.7775	4.8775	-1.14381	Down	0.999983	SGCE	1	K12565|1|5e-101|370|asn:102376109|alpha-sarcoglycan	GO:0043232;GO:0016011//dystroglycan complex;GO:0016021//integral component of membrane;GO:0043232;GO:0016011//dystroglycan complex;GO:0016021//integral component of membrane;GO:0043232;GO:0016011//dystroglycan complex;GO:0016021//integral component of membrane;GO:0043232;GO:0016011//dystroglycan complex;GO:0016021//integral component of membrane;GO:0043232;GO:0016011//dystroglycan complex;GO:0016…	GO:0046872//metal ion binding;GO:0046872//metal ion binding;GO:0046872//metal ion binding;GO:0046872//metal ion binding;GO:0046872//metal ion binding	GO:0031589//cell-substrate adhesion;GO:0048513//animal organ development;GO:0031589//cell-substrate adhesion;GO:0048513//animal organ development;GO:0031589//cell-substrate adhesion;GO:0048513//animal organ development;GO:0031589//cell-substrate adhesion;GO:0048513//animal organ development;GO:0031589//cell-substrate adhesion;GO:0048513//animal organ development	gi|694922602|ref|XP_009451909.1|/0/PREDICTED: epsilon-sarcoglycan isoform X1 [Pan troglodytes]
57214	7128	1.4075	0.6375	-1.14264	Down	0.989547	CEMIP	2	K19031|1|0.0|2877|ggo:101130227|cell migration-inducing and hyaluronan-binding protein [EC:3.2.1.35]	GO:0044424;GO:0044424;GO:0044424	-	-	gi|426380061|ref|XP_004056702.1|/0/PREDICTED: protein KIAA1199 homolog isoform 2 [Gorilla gorilla gorilla]
101927051	1945	2.53	1.1475	-1.14064	Down	0.997443	LOC101927051	1	K19269|1|4e-08|62.8|pbi:103065057|phosphoglycolate phosphatase [EC:3.1.3.18 3.1.3.48]	-	GO:0005488//binding	-	gi|795484408|ref|XP_011893570.1|/6.2336e-13/PREDICTED: SH3 domain-binding protein 1 isoform X3 [Cercocebus atys]
79080	2022	38.4	17.42	-1.14036	Down	1	CCDC86	3	K14822|1|2e-164|581|hsa:79080|rRNA-processing protein CGR1	GO:0043231//intracellular membrane-bounded organelle	-	GO:0051704	gi|13129104|ref|NP_077003.1|/2.01901e-163/coiled-coil domain-containing protein 86 [Homo sapiens]
7078	5496	3.4075	1.5475	-1.13877	Down	0.988702	TIMP3	4	K16866|1|9e-127|458|rro:104680251|metalloproteinase inhibitor 3	GO:0005578//proteinaceous extracellular matrix;GO:0044424	GO:0043169//cation binding;GO:0004866//endopeptidase inhibitor activity	GO:0009888//tissue development;GO:0001101//response to acid chemical;GO:0048545//response to steroid hormone;GO:0050953//sensory perception of light stimulus;GO:0007399//nervous system development;GO:0031330;GO:0009605//response to external stimulus	gi|4507513|ref|NP_000353.1|/8.0554e-126/metalloproteinase inhibitor 3 precursor [Homo sapiens]
692085	78	2.1475	0.98	-1.1318	Down	0.907775	SNORD45C	1	-	-	-	-	-
2583	2356.17	6.1775	2.82	-1.13133	Down	0.999419	B4GALNT1	1	K00725|1|0.0|991|hsa:2583|(N-Acetylneuraminyl)-galactosylglucosylceramide N-acetylgalactosaminyltransferase [EC:2.4.1.92]	GO:0031228//intrinsic component of Golgi membrane;GO:0031228//intrinsic component of Golgi membrane;GO:0031228//intrinsic component of Golgi membrane	GO:0008376//acetylgalactosaminyltransferase activity;GO:0008376//acetylgalactosaminyltransferase activity;GO:0008376//acetylgalactosaminyltransferase activity	GO:0001573//ganglioside metabolic process;GO:0048232//male gamete generation;GO:0010876//lipid localization;GO:0030258//lipid modification;GO:0001573//ganglioside metabolic process;GO:0048232//male gamete generation;GO:0010876//lipid localization;GO:0030258//lipid modification;GO:0001573//ganglioside metabolic process;GO:0048232//male gamete generation;GO:0010876//lipid localization;GO:0030258//l…	gi|4503893|ref|NP_001469.1|/0/beta-1,4 N-acetylgalactosaminyltransferase 1 isoform 1 precursor [Homo sapiens]
26815	72	46.1725	21.16	-1.12569	Down	0.999432	SNORD36A	1	-	-	-	-	-
3800	6744.63	2.9925	1.375	-1.12192	Down	0.999297	KIF5C	1	K10396|1|0.0|1181|ggo:101130460|kinesin family member 5	GO:0005875//microtubule associated complex;GO:0042995//cell projection;GO:0005875//microtubule associated complex;GO:0042995//cell projection	GO:0005102//receptor binding;GO:0003774//motor activity;GO:0032559//adenyl ribonucleotide binding;GO:0005102//receptor binding;GO:0003774//motor activity;GO:0032559//adenyl ribonucleotide binding	GO:0007411//axon guidance;GO:0007017//microtubule-based process;GO:0007411//axon guidance;GO:0007017//microtubule-based process	gi|82571452|gb|AAI10288.1|/0/KIF5C protein [Homo sapiens]
23481	2312	56.385	25.93	-1.12069	Down	0.996529	PES1	1	K14843|1|0.0|938|hsa:23481|pescadillo	GO:0043234//protein complex;GO:0043232;GO:0030684//preribosome;GO:0031981//nuclear lumen;GO:0043234//protein complex;GO:0043232;GO:0030684//preribosome;GO:0031981//nuclear lumen;GO:0043234//protein complex;GO:0043232;GO:0030684//preribosome;GO:0031981//nuclear lumen	GO:0005488//binding;GO:0005488//binding;GO:0005488//binding	GO:0007049//cell cycle;GO:0000470//maturation of LSU-rRNA;GO:0000460//maturation of 5.8S rRNA;GO:0007049//cell cycle;GO:0000470//maturation of LSU-rRNA;GO:0000460//maturation of 5.8S rRNA;GO:0007049//cell cycle;GO:0000470//maturation of LSU-rRNA;GO:0000460//maturation of 5.8S rRNA	gi|7657455|ref|NP_055118.1|/0/pescadillo homolog isoform 1 [Homo sapiens]
160428	7507.34	1.19	0.55	-1.11346	Down	0.999038	ALDH1L2	1	K00289|1|0.0|1069|hsa:160428|formyltetrahydrofolate dehydrogenase [EC:1.5.1.6]	GO:0043231//intracellular membrane-bounded organelle;GO:0043231//intracellular membrane-bounded organelle	GO:0016646//oxidoreductase activity, acting on the CH-NH group of donors, NAD or NADP as acceptor;GO:0019842//vitamin binding;GO:0022892//substrate-specific transporter activity;GO:0016741;GO:0016646//oxidoreductase activity, acting on the CH-NH group of donors, NAD or NADP as acceptor;GO:0019842//vitamin binding;GO:0022892//substrate-specific transporter activity;GO:0016741	GO:0009256//10-formyltetrahydrofolate metabolic process;GO:0009256//10-formyltetrahydrofolate metabolic process	gi|238814322|ref|NP_001029345.2|/0/mitochondrial 10-formyltetrahydrofolate dehydrogenase precursor [Homo sapiens]
84189	4199	27.3225	12.63	-1.11323	Down	1	SLITRK6	2	K06850|1|7e-29|132|cmk:103177282|slit 3	GO:0031224//intrinsic component of membrane	-	GO:0048667//cell morphogenesis involved in neuron differentiation	gi|40217825|ref|NP_115605.2|/0/SLIT and NTRK-like protein 6 precursor [Homo sapiens]
51537	1298	11.8825	5.4975	-1.11199	Down	1	MTFP1	4	K17981|1|2e-89|332|ggo:101142035|mitochondrial fission process protein 1	GO:0019866//organelle inner membrane;GO:0043231//intracellular membrane-bounded organelle;GO:0031224//intrinsic component of membrane;GO:0019866//organelle inner membrane;GO:0043231//intracellular membrane-bounded organelle;GO:0031224//intrinsic component of membrane	GO:0046914//transition metal ion binding;GO:0016836//hydro-lyase activity;GO:0046914//transition metal ion binding;GO:0016836//hydro-lyase activity	GO:0012501//programmed cell death;GO:0012501//programmed cell death	gi|51243057|ref|NP_001003704.1|/7.93403e-74/mitochondrial fission process protein 1 isoform b [Homo sapiens]
6182	1032	73.675	34.3125	-1.10244	Down	0.998124	MRPL12	3	K02935|1|1e-76|289|hsa:6182|large subunit ribosomal protein L7/L12	GO:0043231//intracellular membrane-bounded organelle;GO:0000315//organellar large ribosomal subunit	GO:0003676//nucleic acid binding	GO:0006355//regulation of transcription, DNA-templated	gi|27436901|ref|NP_002940.2|/8.13703e-76/39S ribosomal protein L12, mitochondrial [Homo sapiens]
1287	6523	1.63	0.76	-1.1008	Down	0.994663	COL4A5	2	K06237|1|2e-165|587|pps:100984686|collagen, type IV, alpha	GO:0044420//extracellular matrix component;GO:0005578//proteinaceous extracellular matrix;GO:0044420//extracellular matrix component;GO:0005578//proteinaceous extracellular matrix	GO:0005488//binding;GO:0005488//binding	-	gi|156230677|gb|AAI51847.1|/1.38037e-164/Collagen, type IV, alpha 5 [Homo sapiens]
10437	1034	22.665	10.5925	-1.09742	Down	0.999993	IFI30	4	K08059|1|3e-136|486|hsa:10437|interferon, gamma-inducible protein 30	GO:0000323//lytic vacuole;GO:0044459	GO:0016491//oxidoreductase activity	GO:0019221//cytokine-mediated signaling pathway;GO:0002474//antigen processing and presentation of peptide antigen via MHC class I;GO:0008152//metabolic process	gi|307042|gb|AAA36105.1|/3.85802e-143/gamma-interferon-inducible protein precursor [Homo sapiens]
4502	466	63.6125	29.84	-1.09206	Down	1	MT2A	3	K14739|1|5e-14|78.6|ocu:100343299|metallothionein 1/2	-	GO:0005488//binding	GO:0007165//signal transduction;GO:0042221//response to chemical	gi|635116499|ref|XP_007981228.1|/1.4731e-17/PREDICTED: metallothionein-2-like [Chlorocebus sabaeus]
5029	8611.27	7.4825	3.5125	-1.09102	Down	0.999084	P2RY2	2	K04269|1|0.0|681|ggo:101131285|purinergic receptor P2Y, G protein-coupled, 2	GO:0016021//integral component of membrane;GO:0000323//lytic vacuole;GO:0005768//endosome;GO:0044459;GO:0016021//integral component of membrane;GO:0000323//lytic vacuole;GO:0005768//endosome;GO:0044459;GO:0016021//integral component of membrane;GO:0000323//lytic vacuole;GO:0005768//endosome;GO:0044459	GO:0031685//adenosine receptor binding;GO:0032559//adenyl ribonucleotide binding;GO:0015065//uridine nucleotide receptor activity;GO:0031685//adenosine receptor binding;GO:0032559//adenyl ribonucleotide binding;GO:0015065//uridine nucleotide receptor activity;GO:0031685//adenosine receptor binding;GO:0032559//adenyl ribonucleotide binding;GO:0015065//uridine nucleotide receptor activity	GO:0032305//positive regulation of icosanoid secretion;GO:0009611//response to wounding;GO:0014909//smooth muscle cell migration;GO:0010975//regulation of neuron projection development;GO:0001503//ossification;GO:0042311//vasodilation;GO:0051480//regulation of cytosolic calcium ion concentration;GO:0001819//positive regulation of cytokine production;GO:0007186//G-protein coupled receptor signalin…	gi|469832255|ref|NP_002555.3|/0/P2Y purinoceptor 2 [Homo sapiens]
56342	2440.89	13.8275	6.5	-1.08903	Down	1	PPAN	6	K14859|1|0.0|788|hsa:56342|ribosome biogenesis protein SSF1/2	GO:0031981//nuclear lumen;GO:0031981//nuclear lumen;GO:0031981//nuclear lumen;GO:0031981//nuclear lumen	GO:0005488//binding;GO:0005488//binding;GO:0005488//binding;GO:0005488//binding	GO:0006396//RNA processing;GO:0006396//RNA processing;GO:0006396//RNA processing;GO:0006396//RNA processing	gi|119604480|gb|EAW84074.1|/0/hCG2033702, isoform CRA_b [Homo sapiens]
116372	3571.12	5.965	2.8075	-1.08724	Down	0.999961	LYPD1	1	K08412|1|4e-77|292|hsa:2863|G protein-coupled receptor 39	GO:0016021//integral component of membrane;GO:0016021//integral component of membrane;GO:0016021//integral component of membrane;GO:0016021//integral component of membrane	GO:0043169//cation binding;GO:0004888//transmembrane signaling receptor activity;GO:0043169//cation binding;GO:0004888//transmembrane signaling receptor activity;GO:0043169//cation binding;GO:0004888//transmembrane signaling receptor activity;GO:0043169//cation binding;GO:0004888//transmembrane signaling receptor activity	GO:0007166//cell surface receptor signaling pathway;GO:0007166//cell surface receptor signaling pathway;GO:0007166//cell surface receptor signaling pathway;GO:0007166//cell surface receptor signaling pathway	gi|635057527|ref|XP_007962958.1|/4.4092e-85/PREDICTED: G-protein coupled receptor 39-like [Chlorocebus sabaeus]
4824	3125.01	1.845	0.87	-1.08453	Down	0.994142	NKX3-1	3	K09348|1|1e-79|301|hsa:4824|homeobox protein Nkx-3.1	GO:0043231//intracellular membrane-bounded organelle;GO:0043231//intracellular membrane-bounded organelle	GO:0003707//steroid hormone receptor activity;GO:0001071//nucleic acid binding transcription factor activity;GO:0043565//sequence-specific DNA binding;GO:0035258//steroid hormone receptor binding;GO:0003707//steroid hormone receptor activity;GO:0001071//nucleic acid binding transcription factor activity;GO:0043565//sequence-specific DNA binding;GO:0035258//steroid hormone receptor binding	GO:0035272//exocrine system development;GO:0032091//negative regulation of protein binding;GO:0030518//intracellular steroid hormone receptor signaling pathway;GO:0009968//negative regulation of signal transduction;GO:0060740//prostate gland epithelium morphogenesis;GO:0001763//morphogenesis of a branching structure;GO:0048522;GO:0050680//negative regulation of epithelial cell proliferation;GO:00…	gi|373432628|ref|NP_001243268.1|/9.72542e-75/homeobox protein Nkx-3.1 isoform 2 [Homo sapiens]
26820	75	7.3375	3.4725	-1.07931	Down	0.980548	SNORD24	1	-	-	-	-	-
54584	1537	1.8475	0.875	-1.07822	Down	0.994628	GNB1L	2	K19760|1|6e-11|71.6|ssc:100515511|dynein assembly factor with WDR repeat domains 1;K14855|2|1e-10|70.5|isc:IscW_ISCW015750|ribosome assembly protein 4;K11127|5|2e-10|70.1|gja:107116171|telomerase protein component 1	GO:0044459	-	GO:0051705;GO:0007166//cell surface receptor signaling pathway	gi|17402902|ref|NP_443730.1|/0/guanine nucleotide-binding protein subunit beta-like protein 1 [Homo sapiens]
10131	2310	113.547	53.785	-1.07802	Down	1	TRAP1	1	K09488|1|0.0|1216|hsa:10131|TNF receptor-associated protein 1	GO:0043231//intracellular membrane-bounded organelle;GO:0043231//intracellular membrane-bounded organelle	GO:0032813//tumor necrosis factor receptor superfamily binding;GO:0032559//adenyl ribonucleotide binding;GO:0032813//tumor necrosis factor receptor superfamily binding;GO:0032559//adenyl ribonucleotide binding	GO:0006979//response to oxidative stress;GO:0044267//cellular protein metabolic process;GO:0006979//response to oxidative stress;GO:0044267//cellular protein metabolic process	gi|440309857|ref|NP_001258978.1|/0/heat shock protein 75 kDa, mitochondrial isoform 2 [Homo sapiens]
101060264	499	1.52	0.72	-1.078	Down	0.973518	FOXP4-AS1	1	-	-	-	-	gi|426353169|ref|XP_004044070.1|/1.62538e-22/PREDICTED: uncharacterized protein LOC101139810 [Gorilla gorilla gorilla]
55615	2539.61	3.495	1.6575	-1.07628	Down	0.999077	PRR5	1	K20411|1|0.0|739|hsa:55615|proline-rich protein 5	-	-	GO:0009987//cellular process;GO:0009987//cellular process;GO:0009987//cellular process;GO:0009987//cellular process;GO:0009987//cellular process	gi|31317218|ref|NP_851850.1|/0/proline-rich protein 5 isoform 1 [Homo sapiens]
23246	2427	45.8475	21.7725	-1.07434	Down	1	BOP1	4	K14824|1|0.0|1321|hsa:23246|ribosome biogenesis protein ERB1	GO:0043234//protein complex;GO:0031981//nuclear lumen	GO:0005488//binding	GO:0007049//cell cycle;GO:0000470//maturation of LSU-rRNA	gi|21327667|ref|NP_056016.1|/0/ribosome biogenesis protein BOP1 [Homo sapiens]
30014	418	12.5625	6	-1.06609	Down	0.997495	SPANXA1	3	-	GO:0043231//intracellular membrane-bounded organelle	-	GO:0048232//male gamete generation	gi|14192937|ref|NP_038481.2|/3.50541e-40/sperm protein associated with the nucleus on the X chromosome A [Homo sapiens]
2184	1810	11.2475	5.385	-1.06259	Down	0.999697	FAH	2	K01555|1|0.0|873|hsa:2184|fumarylacetoacetase [EC:3.7.1.2]	GO:0044444//cytoplasmic part	GO:0043169//cation binding;GO:0016823//hydrolase activity, acting on acid carbon-carbon bonds, in ketonic substances	GO:0006525//arginine metabolic process;GO:0006558//L-phenylalanine metabolic process;GO:0006570//tyrosine metabolic process	gi|4557587|ref|NP_000128.1|/0/fumarylacetoacetase [Homo sapiens]
220	3485.78	7.2	3.455	-1.05931	Down	0.994032	ALDH1A3	1	K00129|1|2e-174|616|nle:100586116|aldehyde dehydrogenase (NAD(P)+) [EC:1.2.1.5]	GO:0044424;GO:0044424	GO:0004030//aldehyde dehydrogenase [NAD(P)+] activity;GO:0051287//NAD binding;GO:0042562//hormone binding;GO:0042802//identical protein binding;GO:0004030//aldehyde dehydrogenase [NAD(P)+] activity;GO:0051287//NAD binding;GO:0042562//hormone binding;GO:0042802//identical protein binding	GO:0043010//camera-type eye development;GO:0006915//apoptotic process;GO:0016331//morphogenesis of embryonic epithelium;GO:0042573//retinoic acid metabolic process;GO:0048562//embryonic organ morphogenesis;GO:0021756//striatum development;GO:0042221//response to chemical;GO:0021536//diencephalon development;GO:0043010//camera-type eye development;GO:0006915//apoptotic process;GO:0016331//morphoge…	gi|153266822|ref|NP_000684.2|/0/aldehyde dehydrogenase family 1 member A3 isoform 1 [Homo sapiens]
9532	2068	7.61	3.66	-1.05605	Down	0.999139	BAG2	3	K09556|1|4e-111|404|ggo:101139925|BCL2-associated athanogene 2	-	GO:0005488//binding	GO:0044267//cellular protein metabolic process;GO:0012501//programmed cell death	gi|4757834|ref|NP_004273.1|/3.47927e-110/BAG family molecular chaperone regulator 2 [Homo sapiens]
8797	1764	6.58	3.1675	-1.05474	Down	0.999036	TNFRSF10A	3	K04722|1|0.0|793|nle:100602881|tumor necrosis factor receptor superfamily member 10	GO:0031224//intrinsic component of membrane	GO:0016505//peptidase activator activity involved in apoptotic process;GO:0005515//protein binding;GO:0004888//transmembrane signaling receptor activity	GO:0007249//I-kappaB kinase/NF-kappaB signaling;GO:0009612//response to mechanical stimulus	gi|820995150|ref|XP_012363934.1|/0/PREDICTED: tumor necrosis factor receptor superfamily member 10A [Nomascus leucogenys]
113828	2134	1.08	0.52	-1.05445	Down	0.995235	FAM83F	2	K16805|1|1e-48|197|acs:100554104|protein FAM83D	-	-	-	gi|156564372|ref|NP_612444.2|/0/protein FAM83F [Homo sapiens]
57556	6950	1.625	0.7825	-1.05428	Down	0.994193	SEMA6A	1	K06842|1|0.0|2060|mcf:102115647|semaphorin 6	GO:0043005//neuron projection;GO:0031224//intrinsic component of membrane;GO:0043005//neuron projection;GO:0031224//intrinsic component of membrane	GO:0005488//binding;GO:0004871//signal transducer activity;GO:0005488//binding;GO:0004871//signal transducer activity	GO:0006935//chemotaxis;GO:0048731//system development;GO:0009653//anatomical structure morphogenesis;GO:0007165//signal transduction;GO:0012501//programmed cell death;GO:0006996//organelle organization;GO:0048869//cellular developmental process;GO:0006935//chemotaxis;GO:0048731//system development;GO:0009653//anatomical structure morphogenesis;GO:0007165//signal transduction;GO:0012501//programme…	gi|11991660|ref|NP_065847.1|/0/semaphorin-6A isoform 2 precursor [Homo sapiens]
374378	2531	2.9375	1.415	-1.05379	Down	0.997308	GALNT18	2	K00710|1|0.0|1181|pps:100991628|polypeptide N-acetylgalactosaminyltransferase [EC:2.4.1.41]	-	-	-	gi|635015168|ref|XP_008004895.1|/0/PREDICTED: polypeptide N-acetylgalactosaminyltransferase 18 isoform X5 [Chlorocebus sabaeus]
100500905	96	13.5125	6.515	-1.05246	Down	0.997519	MIR3661	1	K04382|1|5e-11|68.2|bacu:103019215|serine/threonine-protein phosphatase 2A catalytic subunit [EC:3.1.3.16]	-	-	-	gi|594657449|ref|XP_007177066.1|/4.96938e-10/PREDICTED: serine/threonine-protein phosphatase 2A catalytic subunit alpha isoform-like [Balaenoptera acutorostrata scammoni]
26792	72	4.69	2.265	-1.05008	Down	0.987633	SNORD57	1	-	-	-	-	-
11251	2910	3.7425	1.8125	-1.04602	Down	0.998915	PTGDR2	2	K06715|1|1e-173|612|hsa:11251|G protein-coupled receptor 44	GO:0016021//integral component of membrane	GO:0008528//G-protein coupled peptide receptor activity;GO:0004955//prostaglandin receptor activity	GO:0008277//regulation of G-protein coupled receptor protein signaling pathway;GO:0007188//adenylate cyclase-modulating G-protein coupled receptor signaling pathway;GO:0002376//immune system process;GO:0042221//response to chemical	gi|153791424|ref|NP_004769.2|/1.26465e-172/prostaglandin D2 receptor 2 [Homo sapiens]
606500	72	20.2425	9.8125	-1.04469	Down	0.998951	SNORD68	1	-	-	-	-	-
7127	4180	2.9275	1.42	-1.04378	Down	0.947456	TNFAIP2	2	K19989|1|0.0|1088|hsa:7127|tumor necrosis factor alpha-induced protein 2	GO:0044421	-	GO:0032501//multicellular organismal process;GO:0048646//anatomical structure formation involved in morphogenesis;GO:0048869//cellular developmental process	gi|795387868|ref|XP_011939470.1|/0/PREDICTED: tumor necrosis factor alpha-induced protein 2 isoform X1 [Cercocebus atys]
708	1163	164.485	79.815	-1.04322	Down	1	C1QBP	3	K15414|1|1e-146|521|pps:100974832|complement component 1 Q subcomponent-binding protein, mitochondrial	GO:0044421;GO:0016020//membrane;GO:0044429	GO:0001846//opsonin binding	GO:0007599//hemostasis;GO:0072376//protein activation cascade;GO:0051704;GO:0002376//immune system process	gi|4502491|ref|NP_001203.1|/1.16558e-145/complement component 1 Q subcomponent-binding protein, mitochondrial precursor [Homo sapiens]
102724428	4744	4.845	2.355	-1.04077	Down	0.997372	LOC102724428	1	K19008|1|0.0|1353|hsa:102724428|serine/threonine-protein kinase SIK1 [EC:2.7.11.1]	GO:0043231//intracellular membrane-bounded organelle;GO:0044444//cytoplasmic part	GO:0004672//protein kinase activity;GO:0046872//metal ion binding;GO:0032559//adenyl ribonucleotide binding	GO:0000278//mitotic cell cycle;GO:0035556//intracellular signal transduction;GO:0006357//regulation of transcription from RNA polymerase II promoter;GO:0006915//apoptotic process;GO:0050793//regulation of developmental process;GO:0032501//multicellular organismal process;GO:0006464//cellular protein modification process	gi|23620492|gb|AAH38504.1|/0/Salt-inducible kinase 1 [Homo sapiens]
11226	4520	23.395	11.3775	-1.04002	Down	0.999999	GALNT6	3	K00710|1|0.0|1229|hsa:11226|polypeptide N-acetylgalactosaminyltransferase [EC:2.4.1.41]	GO:0012505//endomembrane system;GO:0043231//intracellular membrane-bounded organelle;GO:0031224//intrinsic component of membrane;GO:0044444//cytoplasmic part	GO:0030246//carbohydrate binding;GO:0008376//acetylgalactosaminyltransferase activity	GO:0006486//protein glycosylation	gi|115298684|ref|NP_009141.2|/0/polypeptide N-acetylgalactosaminyltransferase 6 [Homo sapiens]
618	200	1662.12	808.357	-1.03996	Down	0.997989	BCYRN1	1	-	-	-	-	gi|119581507|gb|EAW61103.1|/7.51466e-06/hCG2003764 [Homo sapiens]
11247	1821	1.895	0.9225	-1.03858	Down	0.991049	NXPH4	3	K00600|1|2e-73|279|aam:106482143|glycine hydroxymethyltransferase [EC:2.1.2.1];K04550|2|3e-69|265|asn:102370838|low-density lipoprotein receptor-related protein 1 (alpha-2-macroglobulin receptor);K16657|3|1e-54|216|acs:100553225|neurexophilin-2	-	-	GO:0007186//G-protein coupled receptor signaling pathway	gi|39930315|ref|NP_009155.1|/9.17275e-128/neurexophilin-4 precursor [Homo sapiens]
1382	1088	86.4725	42.2175	-1.0344	Down	0.999395	CRABP2	3	K17289|1|1e-73|279|pps:100970693|cellular retinoic acid-binding protein 2	GO:0031981//nuclear lumen;GO:0031981//nuclear lumen	GO:0005501//retinoid binding;GO:0005501//retinoid binding	GO:0009888//tissue development;GO:0001523//retinoid metabolic process;GO:0023052//signaling;GO:0006351//transcription, DNA-templated;GO:0030326//embryonic limb morphogenesis;GO:0009888//tissue development;GO:0001523//retinoid metabolic process;GO:0023052//signaling;GO:0006351//transcription, DNA-templated;GO:0030326//embryonic limb morphogenesis	gi|440903652|gb|ELR54289.1|/1.0755e-73/Cellular retinoic acid-binding protein 2, partial [Bos mutus]
51295	1710	10.7875	5.275	-1.03212	Down	0.999701	ECSIT	1	K04405|1|0.0|857|hsa:51295|evolutionarily conserved signaling intermediate in Toll pathway	GO:0043231//intracellular membrane-bounded organelle;GO:0043234//protein complex;GO:0043231//intracellular membrane-bounded organelle;GO:0043234//protein complex;GO:0043231//intracellular membrane-bounded organelle;GO:0043234//protein complex;GO:0043231//intracellular membrane-bounded organelle;GO:0043234//protein complex	GO:0005488//binding;GO:0060089;GO:0001071//nucleic acid binding transcription factor activity;GO:0016491//oxidoreductase activity;GO:0005488//binding;GO:0060089;GO:0001071//nucleic acid binding transcription factor activity;GO:0016491//oxidoreductase activity;GO:0005488//binding;GO:0060089;GO:0001071//nucleic acid binding transcription factor activity;GO:0016491//oxidoreductase activity;GO:000548…	GO:0006952//defense response;GO:0006355//regulation of transcription, DNA-templated;GO:0050790//regulation of catalytic activity;GO:0007178//transmembrane receptor protein serine/threonine kinase signaling pathway;GO:0001704//formation of primary germ layer;GO:0006952//defense response;GO:0006355//regulation of transcription, DNA-templated;GO:0050790//regulation of catalytic activity;GO:0007178//…	gi|20149633|ref|NP_057665.2|/0/evolutionarily conserved signaling intermediate in Toll pathway, mitochondrial isoform 1 precursor [Homo sapiens]
65012	2446	1.3325	0.6525	-1.03009	Down	0.997393	SLC26A10	2	K14707|1|0.0|914|hsa:65012|solute carrier family 26, member 10	GO:0031224//intrinsic component of membrane	GO:0015291//secondary active transmembrane transporter activity	GO:0006810//transport	gi|65506789|ref|NP_597996.2|/0/solute carrier family 26 member 10 [Homo sapiens]
101340252	79	1.76	0.8625	-1.02898	Down	0.923841	SNORD121B	1	-	-	-	-	-
26775	132	4.2875	2.1025	-1.02803	Down	0.994193	SNORA72	1	-	-	-	-	-
10514	4356.8	13.9875	6.875	-1.02471	Down	1	MYBBP1A	1	K02331|1|0.0|2329|hsa:10514|DNA polymerase phi [EC:2.7.7.7]	GO:0031074//nucleocytoplasmic shuttling complex;GO:0031981//nuclear lumen;GO:0031074//nucleocytoplasmic shuttling complex;GO:0031981//nuclear lumen	GO:0003676//nucleic acid binding;GO:0034061//DNA polymerase activity;GO:0005515//protein binding;GO:0003676//nucleic acid binding;GO:0034061//DNA polymerase activity;GO:0005515//protein binding	GO:0051169//nuclear transport;GO:0006351//transcription, DNA-templated;GO:0051169//nuclear transport;GO:0006351//transcription, DNA-templated	gi|157694494|ref|NP_001099008.1|/0/myb-binding protein 1A isoform 1 [Homo sapiens]
24138	4034	4.4625	2.195	-1.02363	Down	0.995296	IFIT5	2	K14217|1|2e-139|500|aml:100475782|interferon-induced protein with tetratricopeptide repeats 1	-	-	-	gi|6912630|ref|NP_036552.1|/0/interferon-induced protein with tetratricopeptide repeats 5 [Homo sapiens]
27440	1760.65	18.8775	9.2875	-1.02331	Down	1	CECR5	5	-	GO:0043231//intracellular membrane-bounded organelle;GO:0043231//intracellular membrane-bounded organelle	GO:0003824//catalytic activity;GO:0003824//catalytic activity	-	gi|21914862|ref|NP_060299.4|/0/cat eye syndrome critical region protein 5 isoform 1 [Homo sapiens]
105369332	565	10.0925	4.9675	-1.02269	Down	0.999007	LOC105369332	1	K14841|1|5e-28|125|cfa:483778|ribosome biogenesis protein NSA1	GO:0031981//nuclear lumen	-	-	gi|675790130|ref|XP_008952159.1|/2.60812e-56/PREDICTED: WD repeat-containing protein 74 isoform X1 [Pan paniscus]
118881	1041	10.055	4.95	-1.02241	Down	0.999959	COMTD1	2	-	GO:0031224//intrinsic component of membrane;GO:0043231//intracellular membrane-bounded organelle	GO:0008168//methyltransferase activity	-	gi|635053872|ref|XP_007961111.1|/1.05023e-130/PREDICTED: catechol O-methyltransferase domain-containing protein 1 isoform X3 [Chlorocebus sabaeus]
10018	4987.62	16.93	8.3475	-1.02017	Down	0.99862	BCL2L11	3	K16341|1|1e-41|159|mcf:102135074|Bcl-2-like protein 11	GO:0031966//mitochondrial membrane;GO:0031966//mitochondrial membrane;GO:0031966//mitochondrial membrane;GO:0031966//mitochondrial membrane;GO:0031966//mitochondrial membrane;GO:0031966//mitochondrial membrane;GO:0031966//mitochondrial membrane;GO:0031966//mitochondrial membrane;GO:0031966//mitochondrial membrane;GO:0031966//mitochondrial membrane;GO:0031966//mitochondrial membrane;GO:0031966//mi…	GO:0005488//binding;GO:0005488//binding;GO:0005488//binding;GO:0005488//binding;GO:0005488//binding;GO:0005488//binding;GO:0005488//binding;GO:0005488//binding;GO:0005488//binding;GO:0005488//binding;GO:0005488//binding;GO:0005488//binding;GO:0005488//binding;GO:0005488//binding;GO:0005488//binding;GO:0005488//binding;GO:0005488//binding	GO:0001836//release of cytochrome c from mitochondria;GO:0007169//transmembrane receptor protein tyrosine kinase signaling pathway;GO:0032461//positive regulation of protein oligomerization;GO:0001836//release of cytochrome c from mitochondria;GO:0007169//transmembrane receptor protein tyrosine kinase signaling pathway;GO:0032461//positive regulation of protein oligomerization;GO:0001836//release…	gi|694895874|ref|XP_009441384.1|/5.94526e-35/PREDICTED: bcl-2-like protein 11 isoform X13 [Pan troglodytes]
10669	1649.06	9.1925	4.535	-1.01935	Down	0.999521	CGREF1	1	K00846|1|7e-35|150|ggo:101134632|ketohexokinase [EC:2.7.1.3]	GO:0044444//cytoplasmic part	GO:0046872//metal ion binding;GO:0046872//metal ion binding;GO:0046872//metal ion binding;GO:0016772//transferase activity, transferring phosphorus-containing groups;GO:0000166//nucleotide binding	GO:0050896//response to stimulus;GO:0008283//cell proliferation;GO:0016049//cell growth;GO:0022402//cell cycle process;GO:0050896//response to stimulus;GO:0008283//cell proliferation;GO:0016049//cell growth;GO:0022402//cell cycle process;GO:0050896//response to stimulus;GO:0008283//cell proliferation;GO:0016049//cell growth;GO:0022402//cell cycle process;GO:0006000//fructose metabolic process;GO:…	gi|119621041|gb|EAX00636.1|/1.08805e-142/cell growth regulator with EF-hand domain 1, isoform CRA_b [Homo sapiens]
60386	1652.2	7.77	3.84	-1.01681	Down	0.999227	SLC25A19	1	K15108|1|0.0|649|hsa:60386|solute carrier family 25 (mitochondrial thiamine pyrophosphate transporter), member 19	GO:0019866//organelle inner membrane;GO:0043231//intracellular membrane-bounded organelle;GO:0031224//intrinsic component of membrane;GO:0019866//organelle inner membrane;GO:0043231//intracellular membrane-bounded organelle;GO:0031224//intrinsic component of membrane;GO:0019866//organelle inner membrane;GO:0043231//intracellular membrane-bounded organelle;GO:0031224//intrinsic component of membra…	GO:0015215//nucleotide transmembrane transporter activity;GO:0015215//nucleotide transmembrane transporter activity;GO:0015215//nucleotide transmembrane transporter activity	GO:0006862//nucleotide transport;GO:0006862//nucleotide transport;GO:0006862//nucleotide transport	gi|186928856|ref|NP_068380.3|/0/mitochondrial thiamine pyrophosphate carrier [Homo sapiens]
6472	2280.39	77.7775	38.4625	-1.0159	Down	1	SHMT2	1	K00600|1|0.0|954|nle:100601978|glycine hydroxymethyltransferase [EC:2.1.2.1]	GO:0005856//cytoskeleton;GO:0019866//organelle inner membrane;GO:0005759//mitochondrial matrix;GO:0005740//mitochondrial envelope;GO:0005856//cytoskeleton;GO:0019866//organelle inner membrane;GO:0005759//mitochondrial matrix;GO:0005740//mitochondrial envelope;GO:0005856//cytoskeleton;GO:0019866//organelle inner membrane;GO:0005759//mitochondrial matrix;GO:0005740//mitochondrial envelope;GO:000585…	GO:0016742//hydroxymethyl-, formyl- and related transferase activity;GO:0031406//carboxylic acid binding;GO:0005515//protein binding;GO:0004793//threonine aldolase activity;GO:0048037//cofactor binding;GO:0016742//hydroxymethyl-, formyl- and related transferase activity;GO:0031406//carboxylic acid binding;GO:0005515//protein binding;GO:0004793//threonine aldolase activity;GO:0048037//cofactor bin…	GO:0051260//protein homooligomerization;GO:0006545//glycine biosynthetic process;GO:0006563//L-serine metabolic process;GO:0008283//cell proliferation;GO:0051260//protein homooligomerization;GO:0006545//glycine biosynthetic process;GO:0006563//L-serine metabolic process;GO:0008283//cell proliferation;GO:0051260//protein homooligomerization;GO:0006545//glycine biosynthetic process;GO:0006563//L-se…	gi|821004824|ref|XP_012365783.1|/0/PREDICTED: LOW QUALITY PROTEIN: serine hydroxymethyltransferase, mitochondrial [Nomascus leucogenys]
56905	4443	5.795	2.8675	-1.01502	Down	0.998905	C15orf39	4	-	-	-	-	gi|45120115|ref|NP_056307.2|/0/uncharacterized protein C15orf39 [Homo sapiens]
8318	1996.88	29.6575	14.7275	-1.00988	Down	0.999445	CDC45	4	K06628|1|0.0|1041|hsa:8318|cell division control protein 45	GO:0005815//microtubule organizing center;GO:0031981//nuclear lumen;GO:0005815//microtubule organizing center;GO:0031981//nuclear lumen;GO:0005815//microtubule organizing center;GO:0031981//nuclear lumen	GO:0005488//binding;GO:0005488//binding;GO:0005488//binding	GO:0007050//cell cycle arrest;GO:0006261//DNA-dependent DNA replication;GO:0051320;GO:0007165//signal transduction;GO:0000082//G1/S transition of mitotic cell cycle;GO:0007050//cell cycle arrest;GO:0006261//DNA-dependent DNA replication;GO:0051320;GO:0007165//signal transduction;GO:0000082//G1/S transition of mitotic cell cycle;GO:0007050//cell cycle arrest;GO:0006261//DNA-dependent DNA replicati…	gi|4502713|ref|NP_003495.1|/0/cell division control protein 45 homolog isoform 2 [Homo sapiens]
8784	1214	2.2875	1.1375	-1.00791	Down	0.989594	TNFRSF18	2	K05154|1|2e-82|308|hsa:8784|tumor necrosis factor receptor superfamily member 18	-	GO:0004872//receptor activity;GO:0004872//receptor activity;GO:0005035//death receptor activity	GO:0006915//apoptotic process;GO:0007165//signal transduction;GO:0006915//apoptotic process;GO:0007165//signal transduction;GO:0019221//cytokine-mediated signaling pathway;GO:0043066//negative regulation of apoptotic process	gi|23238194|ref|NP_683699.1|/1.665e-78/tumor necrosis factor receptor superfamily member 18 isoform 2 precursor [Homo sapiens]
9792	5565	2.32	1.155	-1.00623	Down	0.998475	SERTAD2	2	-	GO:0043231//intracellular membrane-bounded organelle	GO:0003712//transcription cofactor activity	GO:0016049//cell growth;GO:0006355//regulation of transcription, DNA-templated	gi|767915501|ref|XP_011531506.1|/2.43747e-154/PREDICTED: SERTA domain-containing protein 2 isoform X2 [Homo sapiens]
10865	2181.63	1.195	0.595	-1.00605	Down	0.993043	ARID5A	1	K06676|1|7e-18|95.5|gfr:102034316|condensin complex subunit 2;K19195|2|9e-13|78.6|oaa:100081355|AT-rich interactive domain-containing protein 4B;K07874|3|6e-12|75.9|bmor:101744501|Ras-related protein Rab-1A	GO:0031981//nuclear lumen;GO:0031981//nuclear lumen;GO:0031981//nuclear lumen;GO:0031981//nuclear lumen;GO:0031981//nuclear lumen;GO:0031981//nuclear lumen;GO:0031981//nuclear lumen	GO:0003676//nucleic acid binding;GO:0003676//nucleic acid binding;GO:0003676//nucleic acid binding;GO:0003676//nucleic acid binding;GO:0003676//nucleic acid binding;GO:0003676//nucleic acid binding;GO:0003676//nucleic acid binding	GO:0006355//regulation of transcription, DNA-templated;GO:0006355//regulation of transcription, DNA-templated;GO:0006355//regulation of transcription, DNA-templated;GO:0006355//regulation of transcription, DNA-templated;GO:0006355//regulation of transcription, DNA-templated;GO:0006355//regulation of transcription, DNA-templated;GO:0006355//regulation of transcription, DNA-templated	gi|188684|gb|AAA36325.1|/0/modulator recognition factor I, partial [Homo sapiens]
5902	1153.12	206.977	103.08	-1.00571	Down	1	RANBP1	3	K15306|1|1e-91|339|mcf:102143751|Ran-binding protein 1	GO:0005815//microtubule organizing center;GO:0043231//intracellular membrane-bounded organelle;GO:0012505//endomembrane system;GO:0005815//microtubule organizing center;GO:0043231//intracellular membrane-bounded organelle;GO:0012505//endomembrane system;GO:0005815//microtubule organizing center;GO:0043231//intracellular membrane-bounded organelle;GO:0012505//endomembrane system;GO:0005815//microt…	GO:0008047//enzyme activator activity;GO:0017016//Ras GTPase binding;GO:0008047//enzyme activator activity;GO:0017016//Ras GTPase binding;GO:0008047//enzyme activator activity;GO:0017016//Ras GTPase binding;GO:0008047//enzyme activator activity;GO:0017016//Ras GTPase binding	GO:0006810//transport;GO:0023052//signaling;GO:0046602//regulation of mitotic centrosome separation;GO:0006810//transport;GO:0023052//signaling;GO:0046602//regulation of mitotic centrosome separation;GO:0006810//transport;GO:0023052//signaling;GO:0046602//regulation of mitotic centrosome separation;GO:0006810//transport;GO:0023052//signaling;GO:0046602//regulation of mitotic centrosome separation	gi|520975477|ref|NP_001265568.1|/1.23612e-139/ran-specific GTPase-activating protein isoform 1 [Homo sapiens]
6891	3776.11	7.12	3.555	-1.00203	Down	0.997504	TAP2	3	K05654|1|0.0|1107|pps:100969573|ATP-binding cassette, subfamily B (MDR/TAP), member 3	GO:0042824//MHC class I peptide loading complex;GO:0042824//MHC class I peptide loading complex	GO:0042287//MHC protein binding;GO:0003823//antigen binding;GO:0046977;GO:0032559//adenyl ribonucleotide binding;GO:0015440//peptide-transporting ATPase activity;GO:0042287//MHC protein binding;GO:0003823//antigen binding;GO:0046977;GO:0032559//adenyl ribonucleotide binding;GO:0015440//peptide-transporting ATPase activity	GO:0002484;GO:0002477//antigen processing and presentation of exogenous peptide antigen via MHC class Ib;GO:0001912//positive regulation of leukocyte mediated cytotoxicity;GO:0002488;GO:0015833//peptide transport;GO:0051704;GO:0046907//intracellular transport;GO:0002484;GO:0002477//antigen processing and presentation of exogenous peptide antigen via MHC class Ib;GO:0009207;GO:0001912//positive re…	gi|73747915|ref|NP_000535.3|/0/antigen peptide transporter 2 isoform 1 [Homo sapiens]
56155	4816	1.605	0.8025	-1	Down	0.989051	TEX14	1	K17540|1|0.0|2940|hsa:56155|inactive serine/threonine-protein kinase TEX14	GO:0044424;GO:0044424;GO:0044424	GO:0016301//kinase activity;GO:0032559//adenyl ribonucleotide binding;GO:0016301//kinase activity;GO:0032559//adenyl ribonucleotide binding;GO:0016301//kinase activity;GO:0032559//adenyl ribonucleotide binding	GO:0006464//cellular protein modification process;GO:0006464//cellular protein modification process;GO:0006464//cellular protein modification process	gi|319803120|ref|NP_001188386.1|/0/inactive serine/threonine-protein kinase TEX14 isoform c [Homo sapiens]
55753	3645.17	0.585	1.17	1	Up	0.992387	OGDHL	1	K00164|1|0.0|1776|hsa:55753|2-oxoglutarate dehydrogenase E1 component [EC:1.2.4.2]	GO:0044429;GO:0044429;GO:0044429	GO:0016624//oxidoreductase activity, acting on the aldehyde or oxo group of donors, disulfide as acceptor;GO:0019842//vitamin binding;GO:0016624//oxidoreductase activity, acting on the aldehyde or oxo group of donors, disulfide as acceptor;GO:0019842//vitamin binding;GO:0016624//oxidoreductase activity, acting on the aldehyde or oxo group of donors, disulfide as acceptor;GO:0019842//vitamin bindi…	GO:0006007//glucose catabolic process;GO:0006007//glucose catabolic process;GO:0006007//glucose catabolic process	gi|221316661|ref|NP_060715.2|/0/2-oxoglutarate dehydrogenase-like, mitochondrial isoform a [Homo sapiens]
22925	5448.3	0.62	1.2425	1.00291	Up	0.997525	PLA2R1	4	K06560|1|0.0|3028|hsa:22925|mannose receptor, C type	GO:0016021//integral component of membrane;GO:0044421;GO:0016021//integral component of membrane;GO:0044421	GO:0030246//carbohydrate binding;GO:0004871//signal transducer activity;GO:0030246//carbohydrate binding	GO:0016192//vesicle-mediated transport;GO:0016192//vesicle-mediated transport	gi|931566917|ref|XP_003820997.3|/0/PREDICTED: secretory phospholipase A2 receptor [Pan paniscus]
85319	1891	1.5575	3.125	1.00462	Up	0.998795	BAGE2	2	K09188|1|5e-151|299|ggo:101134599|histone-lysine N-methyltransferase MLL3 [EC:2.1.1.43]	-	-	-	gi|426358564|ref|XP_004046577.1|/4.08924e-150/PREDICTED: histone-lysine N-methyltransferase MLL3 [Gorilla gorilla gorilla]
26575	1472	1.7875	3.59	1.00604	Up	0.997518	RGS17	4	K16449|1|1e-102|375|ecb:100060098|regulator of G-protein signaling	GO:0043231//intracellular membrane-bounded organelle;GO:0016020//membrane	GO:0060089;GO:0008047//enzyme activator activity	GO:0007165//signal transduction	gi|767942666|ref|XP_011534055.1|/1.40551e-104/PREDICTED: regulator of G-protein signaling 17 isoform X3 [Homo sapiens]
64598	1167.03	6.07	12.205	1.0077	Up	0.9987	MOSPD3	1	-	GO:0016020//membrane;GO:0016020//membrane;GO:0016020//membrane;GO:0016020//membrane	-	-	gi|93141016|ref|NP_001035188.1|/3.92978e-80/motile sperm domain-containing protein 3 isoform b [Homo sapiens]
10753	2279.83	3.6975	7.4425	1.00924	Up	0.998761	CAPN9	2	K08578|1|0.0|1320|ggo:101140209|calpain-9 [EC:3.4.22.-]	GO:0044464;GO:0044464;GO:0044464	GO:0046872//metal ion binding;GO:0004197//cysteine-type endopeptidase activity;GO:0046872//metal ion binding;GO:0004197//cysteine-type endopeptidase activity;GO:0046872//metal ion binding;GO:0004197//cysteine-type endopeptidase activity	GO:0032501//multicellular organismal process;GO:0019538//protein metabolic process;GO:0032501//multicellular organismal process;GO:0019538//protein metabolic process;GO:0032501//multicellular organismal process;GO:0019538//protein metabolic process	gi|5729758|ref|NP_006606.1|/0/calpain-9 isoform 1 [Homo sapiens]
3299	2551.84	2.2225	4.4775	1.01051	Up	0.992265	HSF4	3	K09417|1|0.0|802|ptr:741145|heat shock transcription factor 4	GO:0043231//intracellular membrane-bounded organelle;GO:0043231//intracellular membrane-bounded organelle	GO:0003712//transcription cofactor activity;GO:0001071//nucleic acid binding transcription factor activity;GO:0003677//DNA binding;GO:0003712//transcription cofactor activity;GO:0001071//nucleic acid binding transcription factor activity;GO:0003677//DNA binding	GO:0050896//response to stimulus;GO:0001654//eye development;GO:0045595//regulation of cell differentiation;GO:0006357//regulation of transcription from RNA polymerase II promoter;GO:0051260//protein homooligomerization;GO:0070076//histone lysine demethylation;GO:0008283//cell proliferation;GO:0050896//response to stimulus;GO:0001654//eye development;GO:0045595//regulation of cell differentiation…	gi|100913211|ref|NP_001529.2|/0/heat shock factor protein 4 isoform a [Homo sapiens]
5587	3679	0.6725	1.355	1.01069	Up	0.999084	PRKD1	2	K06070|1|0.0|1708|hsa:5587|protein kinase D [EC:2.7.11.13]	GO:0044444//cytoplasmic part;GO:0016021//integral component of membrane;GO:0044444//cytoplasmic part;GO:0016021//integral component of membrane	GO:0043169//cation binding;GO:0004674//protein serine/threonine kinase activity;GO:0032559//adenyl ribonucleotide binding;GO:0043169//cation binding;GO:0004674//protein serine/threonine kinase activity;GO:0032559//adenyl ribonucleotide binding	GO:0006643//membrane lipid metabolic process;GO:0006464//cellular protein modification process;GO:0007165//signal transduction;GO:0006643//membrane lipid metabolic process;GO:0006464//cellular protein modification process;GO:0007165//signal transduction	gi|530404191|ref|XP_005267916.1|/0/PREDICTED: serine/threonine-protein kinase D1 isoform X1 [Homo sapiens]
10409	1840.34	61.255	123.478	1.01135	Up	0.999684	BASP1	4	K17272|1|2e-16|90.5|hsa:10409|brain acid soluble protein 1	GO:0016604//nuclear body;GO:0043232;GO:0016604//nuclear body;GO:0043232	GO:0003712//transcription cofactor activity;GO:0043565//sequence-specific DNA binding;GO:0005515//protein binding;GO:0003712//transcription cofactor activity;GO:0043565//sequence-specific DNA binding;GO:0005515//protein binding	GO:0061318;GO:0061318	gi|344246100|gb|EGW02204.1|/1.31703e-19/hypothetical protein I79_011772 [Cricetulus griseus]
65055	3796.86	2.9775	6.0025	1.01146	Up	0.998719	REEP1	1	K17338|1|3e-55|220|ggo:101129493|receptor expression-enhancing protein 1/2/3/4	GO:0016020//membrane;GO:0005739//mitochondrion;GO:0005740//mitochondrial envelope;GO:0031224//intrinsic component of membrane	GO:0001664//G-protein coupled receptor binding;GO:0001664//G-protein coupled receptor binding	GO:0034613//cellular protein localization;GO:0034613//cellular protein localization	gi|221041768|dbj|BAH12561.1|/5.98694e-83/unnamed protein product [Homo sapiens]
101928936	3974	9.11	18.3875	1.0132	Up	0.999156	LOC101928936	1	-	-	-	-	gi|17980446|gb|AAL50636.1|/3.64824e-52/unknown [Homo sapiens]
23328	7251.78	5.39	10.88	1.01332	Up	0.999293	SASH1	4	K12581|1|4e-24|117|nle:100584332|CCR4-NOT transcription complex subunit 7/8;K01064|2|1e-20|106|mcf:102130297|wingless-type MMTV integration site family, member 9;K17985|3|2e-18|92.4|hsa:55626|activating molecule in BECN1-regulated autophagy protein 1;K02927|5|3e-18|98.2|nle:100604619|large subunit ribosomal protein L40e	-	GO:0005488//binding;GO:0005488//binding;GO:0005488//binding;GO:0005488//binding	-	gi|45935385|ref|NP_056093.3|/0/SAM and SH3 domain-containing protein 1 [Homo sapiens]
83699	4842	4.8675	9.8275	1.01364	Up	0.999162	SH3BGRL2	3	K03877|1|6e-32|143|tgu:100227439|beta-1,3-galactosyltransferase 5 [EC:2.4.1.-];K13912|2|2e-09|68.6|xma:102221819|deleted in malignant brain tumors 1 protein	GO:0043231//intracellular membrane-bounded organelle	GO:0019904//protein domain specific binding	-	gi|947209893|ref|XP_006143405.2|/3.65329e-70/PREDICTED: SH3 domain-binding glutamic acid-rich-like protein 2 [Tupaia chinensis]
79957	2006.2	1.7825	3.6	1.01409	Up	0.992705	PAQR6	1	K17387|1|5e-60|234|gfr:102034408|kinesin family member 23;K07297|3|8e-13|78.2|aqu:100634009|adiponectin receptor	GO:0031224//intrinsic component of membrane;GO:0031224//intrinsic component of membrane;GO:0031224//intrinsic component of membrane;GO:0031224//intrinsic component of membrane;GO:0031224//intrinsic component of membrane;GO:0031224//intrinsic component of membrane;GO:0031224//intrinsic component of membrane;GO:0031224//intrinsic component of membrane;GO:0031224//intrinsic component of membrane;GO:…	GO:0004871//signal transducer activity;GO:0004871//signal transducer activity;GO:0004871//signal transducer activity;GO:0004871//signal transducer activity;GO:0004871//signal transducer activity;GO:0004871//signal transducer activity;GO:0004871//signal transducer activity;GO:0004871//signal transducer activity;GO:0004871//signal transducer activity;GO:0004871//signal transducer activity	-	gi|578801515|ref|XP_006711612.1|/6.06812e-167/PREDICTED: progestin and adipoQ receptor family member 6 isoform X4 [Homo sapiens]
9722	4568.66	2.665	5.3825	1.01414	Up	0.997219	NOS1AP	1	K16513|1|0.0|750|hsa:9722|carboxyl-terminal PDZ ligand of neuronal nitric oxide synthase protein	-	GO:0019904//protein domain specific binding;GO:0019899//enzyme binding;GO:0019904//protein domain specific binding;GO:0019899//enzyme binding;GO:0019904//protein domain specific binding;GO:0019899//enzyme binding	GO:0006915//apoptotic process;GO:0031326;GO:0032768;GO:0006915//apoptotic process;GO:0031326;GO:0032768;GO:0006915//apoptotic process;GO:0031326;GO:0032768	gi|332219362|ref|XP_003258825.1|/4.81799e-102/PREDICTED: carboxyl-terminal PDZ ligand of neuronal nitric oxide synthase protein [Nomascus leucogenys]
55715	2841.06	3.7925	7.66	1.0142	Up	0.996504	DOK4	1	K14752|1|9e-14|82.0|pbi:103059880|docking protein 1;K20234|5|1e-12|78.2|phi:102113335|docking protein 2	GO:0043231//intracellular membrane-bounded organelle	GO:0005102//receptor binding;GO:0005102//receptor binding	GO:0048731//system development;GO:0007167//enzyme linked receptor protein signaling pathway;GO:0048731//system development;GO:0007167//enzyme linked receptor protein signaling pathway	gi|548502975|ref|XP_005692081.1|/0/PREDICTED: docking protein 4 [Capra hircus]
4739	4489.71	7.89	15.9375	1.01433	Up	1	NEDD9	1	K16832|1|0.0|1642|pps:100989201|enhancer of filamentation 1	GO:0043231//intracellular membrane-bounded organelle;GO:0015630//microtubule cytoskeleton;GO:0031252//cell leading edge;GO:0005924//cell-substrate adherens junction;GO:0044444//cytoplasmic part;GO:0043231//intracellular membrane-bounded organelle;GO:0015630//microtubule cytoskeleton;GO:0031252//cell leading edge;GO:0005924//cell-substrate adherens junction;GO:0044444//cytoplasmic part;GO:0043231/…	GO:0005488//binding;GO:0005488//binding;GO:0005488//binding;GO:0005488//binding;GO:0005488//binding	GO:0007015//actin filament organization;GO:0000087//mitotic M phase;GO:0007166//cell surface receptor signaling pathway;GO:0007015//actin filament organization;GO:0000087//mitotic M phase;GO:0007166//cell surface receptor signaling pathway;GO:0007015//actin filament organization;GO:0000087//mitotic M phase;GO:0007166//cell surface receptor signaling pathway;GO:0007015//actin filament organization…	gi|119575707|gb|EAW55303.1|/0/neural precursor cell expressed, developmentally down-regulated 9, isoform CRA_d [Homo sapiens]
155060	3154	0.62	1.2525	1.01447	Up	0.995749	LOC155060	1	K09228|1|3e-63|134|nle:101178035|KRAB domain-containing zinc finger protein	-	-	-	gi|694924719|ref|XP_009452737.1|/1.28021e-101/PREDICTED: zinc finger protein 497-like isoform X1 [Pan troglodytes]
353355	2806	0.575	1.1625	1.0156	Up	0.998634	ZNF233	1	K09228|1|0.0|1254|hsa:353355|KRAB domain-containing zinc finger protein	GO:0031981//nuclear lumen;GO:0031981//nuclear lumen;GO:0031981//nuclear lumen	GO:0046914//transition metal ion binding;GO:0003676//nucleic acid binding;GO:0046914//transition metal ion binding;GO:0003676//nucleic acid binding;GO:0046914//transition metal ion binding;GO:0003676//nucleic acid binding	GO:0006351//transcription, DNA-templated;GO:0006351//transcription, DNA-templated;GO:0006351//transcription, DNA-templated	gi|333033765|ref|NP_001193934.1|/0/zinc finger protein 233 [Homo sapiens]
90362	4368	0.57	1.1525	1.01573	Up	0.996929	FAM110B	2	-	GO:0015630//microtubule cytoskeleton;GO:0043231//intracellular membrane-bounded organelle	-	-	gi|148673748|gb|EDL05695.1|/5.25175e-173/RIKEN cDNA 1700012H17, isoform CRA_c, partial [Mus musculus]
353219	1382	2.27	4.59	1.0158	Up	0.999006	KAAG1	3	K19538|1|3e-11|72.4|oas:101114620|retinitis pigmentosa 1	-	-	GO:0048731//system development;GO:0006952//defense response;GO:0016477//cell migration;GO:0007165//signal transduction	gi|820996287|ref|XP_012364243.1|/1.06422e-58/PREDICTED: doublecortin domain-containing protein 2 isoform X1 [Nomascus leucogenys]
85004	2317.91	12.0025	24.2925	1.01718	Up	1	RERG	2	K07855|1|2e-108|396|hgl:101716934|Ras-related and estrogen-regulated growth inhibitor	GO:0043231//intracellular membrane-bounded organelle;GO:0044444//cytoplasmic part	GO:0017111//nucleoside-triphosphatase activity;GO:0032561//guanyl ribonucleotide binding;GO:0035258//steroid hormone receptor binding	GO:0035556//intracellular signal transduction;GO:0016049//cell growth;GO:0009719;GO:0009207;GO:0008283//cell proliferation	gi|299758439|ref|NP_001177655.1|/7.1307e-96/ras-related and estrogen-regulated growth inhibitor isoform 2 [Homo sapiens]
79026	18621.6	46.685	94.5475	1.01808	Up	1	AHNAK	2	K19326|1|2e-46|193|api:100167295|nesprin-1	GO:0043231//intracellular membrane-bounded organelle;GO:0043231//intracellular membrane-bounded organelle;GO:0043231//intracellular membrane-bounded organelle;GO:0043231//intracellular membrane-bounded organelle	GO:0005488//binding;GO:0005488//binding;GO:0005488//binding	GO:0048731//system development;GO:0048731//system development;GO:0048731//system development;GO:0048731//system development	gi|61743954|ref|NP_001611.1|/0/neuroblast differentiation-associated protein AHNAK isoform 1 [Homo sapiens]
3717	4943.56	13.21	26.755	1.01818	Up	0.999192	JAK2	3	K04447|1|0.0|2252|hsa:3717|Janus kinase 2 [EC:2.7.10.2]	GO:0034399//nuclear periphery;GO:0043232;GO:0044459;GO:0044444//cytoplasmic part;GO:0034399//nuclear periphery;GO:0043232;GO:0044459;GO:0044444//cytoplasmic part;GO:0034399//nuclear periphery;GO:0043232;GO:0044459;GO:0044444//cytoplasmic part;GO:0034399//nuclear periphery;GO:0043232;GO:0044459;GO:0044444//cytoplasmic part;GO:0034399//nuclear periphery;GO:0043232;GO:0044459;GO:0044444//cytoplasmic…	GO:0005506//iron ion binding;GO:0051427//hormone receptor binding;GO:0035400;GO:0019900//kinase binding;GO:0032559//adenyl ribonucleotide binding;GO:0005126//cytokine receptor binding;GO:0019904//protein domain specific binding;GO:0005506//iron ion binding;GO:0051427//hormone receptor binding;GO:0035400;GO:0019900//kinase binding;GO:0032559//adenyl ribonucleotide binding;GO:0005126//cytokine rece…	GO:0031958;GO:0042506//tyrosine phosphorylation of Stat5 protein;GO:0009888//tissue development;GO:0007162//negative regulation of cell adhesion;GO:0032611//interleukin-1 beta production;GO:0007169//transmembrane receptor protein tyrosine kinase signaling pathway;GO:0035406;GO:0031349//positive regulation of defense response;GO:0008016//regulation of heart contraction;GO:0043523//regulation of ne…	gi|4826776|ref|NP_004963.1|/0/tyrosine-protein kinase JAK2 [Homo sapiens]
135398	1696	6.4875	13.1425	1.01851	Up	0.999005	C6orf141	1	-	-	-	-	gi|224586894|ref|NP_001139124.1|/5.23111e-130/uncharacterized protein C6orf141 [Homo sapiens]
123099	1411	4.9175	9.9625	1.01858	Up	0.996762	DEGS2	2	K04712|1|0.0|675|hsa:123099|sphingolipid Delta-4 desaturase [EC:1.14.-.-]	GO:0031090//organelle membrane;GO:0043231//intracellular membrane-bounded organelle;GO:0031224//intrinsic component of membrane	GO:0016705//oxidoreductase activity, acting on paired donors, with incorporation or reduction of molecular oxygen	GO:0006066//alcohol metabolic process;GO:0006631//fatty acid metabolic process;GO:0006672//ceramide metabolic process	gi|724951869|ref|XP_010351966.1|/0/PREDICTED: sphingolipid delta(4)-desaturase/C4-hydroxylase DES2 isoform X2 [Rhinopithecus roxellana]
9223	7032.02	4.855	9.84	1.01919	Up	0.999185	MAGI1	2	K05631|1|0.0|2235|mcf:102136159|atrophin-1 interacting protein 3 (BAI1-associated protein 1)	-	-	-	gi|74272282|ref|NP_056335.1|/0/membrane-associated guanylate kinase, WW and PDZ domain-containing protein 1 isoform a [Homo sapiens]
56899	2872.08	0.6325	1.2825	1.01982	Up	0.99215	ANKS1B	1	K11322|1|2e-12|77.4|api:100158774|enhancer of polycomb-like protein;K12474|2|1e-09|68.2|cjo:107312260|low density lipoprotein receptor adapter protein 1;K06057|5|7e-09|65.9|oas:101120009|numb	GO:0030425//dendrite;GO:0044459;GO:0016604//nuclear body;GO:0044430;GO:0030425//dendrite;GO:0044459;GO:0016604//nuclear body;GO:0044430;GO:0030425//dendrite;GO:0044459;GO:0016604//nuclear body;GO:0044430;GO:0030425//dendrite;GO:0044459;GO:0016604//nuclear body;GO:0044430;GO:0030425//dendrite;GO:0044459;GO:0016604//nuclear body;GO:0044430;GO:0030425//dendrite;GO:0044459;GO:0016604//nuclear body;GO…	-	-	gi|182705398|emb|CAQ37746.1|/0/putative ankyrin repeat and sterile alpha motif domain containing 1B [Homo sapiens]
80235	2759	0.6775	1.375	1.02114	Up	0.997216	PIGZ	3	K08098|1|0.0|1005|hsa:80235|phosphatidylinositol glycan, class Z [EC:2.4.1.-]	GO:0005789//endoplasmic reticulum membrane;GO:0031224//intrinsic component of membrane	GO:0000030//mannosyltransferase activity	GO:0006497//protein lipidation	gi|767927667|ref|XP_011511492.1|/0/PREDICTED: GPI mannosyltransferase 4 isoform X1 [Homo sapiens]
283981	1811.6	1.95	3.965	1.02385	Up	0.987499	LINC00685	1	K08342|1|8e-09|65.1|phi:102107576|cysteine protease ATG4 [EC:3.4.22.-];K01064|3|4e-06|56.2|mcc:716877|wingless-type MMTV integration site family, member 9	GO:0005815//microtubule organizing center;GO:0005815//microtubule organizing center	GO:0005488//binding;GO:0005488//binding	GO:0016477//cell migration;GO:0016055//Wnt signaling pathway;GO:0007405//neuroblast proliferation;GO:0016477//cell migration;GO:0016055//Wnt signaling pathway;GO:0007405//neuroblast proliferation	gi|685619442|ref|XP_009197055.1|/6.36018e-23/PREDICTED: LOW QUALITY PROTEIN: collagen alpha-1(VII) chain-like, partial [Papio anubis]
105377975	812	0.595	1.21	1.02405	Up	0.9932	LOC105377975	1	-	-	-	-	gi|119568568|gb|EAW48183.1|/5.2003e-39/hCG2041798, partial [Homo sapiens]
7051	2777	0.9925	2.02	1.02522	Up	0.995734	TGM1	2	K05619|1|0.0|1506|hsa:7051|transglutaminase 1 [EC:2.3.2.13]	GO:0005856//cytoskeleton;GO:0044425	GO:0016747//transferase activity, transferring acyl groups other than amino-acyl groups;GO:0043169//cation binding;GO:0016755//transferase activity, transferring amino-acyl groups	GO:0045229//external encapsulating structure organization;GO:0030216//keratinocyte differentiation;GO:0006464//cellular protein modification process	gi|4507475|ref|NP_000350.1|/0/protein-glutamine gamma-glutamyltransferase K [Homo sapiens]
653162	1440	1.1325	2.305	1.02526	Up	0.996859	RPSAP9	1	K02998|1|8e-150|532|cjc:100400370|small subunit ribosomal protein SAe	GO:0030684//preribosome;GO:0016020//membrane;GO:0043231//intracellular membrane-bounded organelle;GO:0044297//cell body;GO:0005578//proteinaceous extracellular matrix;GO:0015935//small ribosomal subunit	GO:0004871//signal transducer activity;GO:0005198//structural molecule activity;GO:0005515//protein binding;GO:0043021//ribonucleoprotein complex binding	GO:0031016//pancreas development;GO:0007155//cell adhesion;GO:0006412//translation;GO:0022618//ribonucleoprotein complex assembly;GO:0019080;GO:0023052//signaling;GO:0000462//maturation of SSU-rRNA from tricistronic rRNA transcript (SSU-rRNA, 5.8S rRNA, LSU-rRNA)	gi|820983550|ref|XP_012351476.1|/3.30488e-151/PREDICTED: 40S ribosomal protein SA isoform X1 [Nomascus leucogenys]
83849	4761.83	1.53	3.12	1.02801	Up	0.999186	SYT15	2	K19914|1|0.0|760|nle:100586379|synaptotagmin-15	GO:0031224//intrinsic component of membrane;GO:0031224//intrinsic component of membrane	-	-	gi|332265987|ref|XP_003281995.1|/0/PREDICTED: synaptotagmin-15 isoform X1 [Nomascus leucogenys]
169611	6477.45	1.0425	2.1275	1.02911	Up	0.994033	OLFML2A	1	K04592|1|3e-50|204|tru:101073538|latrophilin 1;K04593|5|7e-49|199|tru:101062496|latrophilin 2	GO:0044421;GO:0044421	GO:0042802//identical protein binding;GO:0042802//identical protein binding	GO:0043062//extracellular structure organization;GO:0043062//extracellular structure organization	gi|544186069|ref|NP_001269644.1|/0/olfactomedin-like protein 2A isoform 2 [Homo sapiens]
10457	2762.98	4.995	10.1975	1.02966	Up	0.996986	GPNMB	1	K17304|1|7e-51|205|lcm:102365525|melanocyte protein PMEL	GO:0048770;GO:0016021//integral component of membrane;GO:0048770;GO:0016021//integral component of membrane	GO:0005539//glycosaminoglycan binding;GO:0005102//receptor binding;GO:0005539//glycosaminoglycan binding;GO:0005102//receptor binding	GO:0008283//cell proliferation;GO:0001503//ossification;GO:0009987//cellular process;GO:0008283//cell proliferation;GO:0001503//ossification;GO:0009987//cellular process	gi|194388124|dbj|BAG65446.1|/0/unnamed protein product [Homo sapiens]
101937451	765	0.65	1.3275	1.0302	Up	0.994139	LINC01030	1	-	-	-	-	gi|119593320|gb|EAW72914.1|/3.77041e-11/hCG2038221, partial [Homo sapiens]
2526	6063	1.4675	3	1.0316	Up	0.998623	FUT4	3	K07632|1|0.0|1009|hsa:2526|galactoside alpha-1,3-fucosyltransferase 4 [EC:2.4.1.-]	GO:0031224//intrinsic component of membrane;GO:0000139//Golgi membrane	GO:0008417//fucosyltransferase activity	GO:0019317;GO:0006464//cellular protein modification process	gi|4503811|ref|NP_002024.1|/0/alpha-(1,3)-fucosyltransferase 4 [Homo sapiens]
100129434	2863	169.433	346.65	1.03277	Up	1	LOC100129434	1	K19941|1|2e-52|210|lcm:102351696|synapsin;K17495|2|8e-42|175|bom:106701751|CUB and sushi domain-containing protein;K04810|3|2e-24|117|gja:107111011|nicotinic acetylcholine receptor alpha-9;K05641|4|3e-23|113|sko:102809967|ATP-binding cassette, subfamily A (ABC1), member 1;K01273|5|3e-22|110|pxy:105386179|membrane dipeptidase [EC:3.4.13.19]	-	-	-	gi|2072972|gb|AAC51276.1|/0/putative p150 [Homo sapiens]
5934	4682.74	13.77	28.1825	1.03327	Up	1	RBL2	1	K16332|1|0.0|1954|hsa:5934|retinoblastoma-like protein 2	GO:0044427;GO:0043234//protein complex;GO:0031981//nuclear lumen;GO:0044427;GO:0043234//protein complex;GO:0031981//nuclear lumen;GO:0044427;GO:0043234//protein complex;GO:0031981//nuclear lumen;GO:0044427;GO:0043234//protein complex;GO:0031981//nuclear lumen;GO:0044427;GO:0043234//protein complex;GO:0031981//nuclear lumen	GO:0003676//nucleic acid binding;GO:0003676//nucleic acid binding;GO:0003676//nucleic acid binding;GO:0003676//nucleic acid binding;GO:0003676//nucleic acid binding	GO:0006325//chromatin organization;GO:0007049//cell cycle;GO:0019216//regulation of lipid metabolic process;GO:0006325//chromatin organization;GO:0007049//cell cycle;GO:0019216//regulation of lipid metabolic process;GO:0006325//chromatin organization;GO:0007049//cell cycle;GO:0019216//regulation of lipid metabolic process;GO:0006325//chromatin organization;GO:0007049//cell cycle;GO:0019216//regul…	gi|724807281|ref|XP_010356527.1|/0/PREDICTED: retinoblastoma-like protein 2 isoform X1 [Rhinopithecus roxellana]
7739	4263.8	13.065	26.7675	1.03478	Up	0.998995	ZNF185	1	K16580|1|7e-11|73.2|shr:100931839|SLAIN motif-containing protein 1/2;K06084|3|3e-06|57.8|dre:553341|F-box protein 20;K11294|4|6e-06|56.6|dya:Dyak_GE22590|nucleolin	GO:0005924//cell-substrate adherens junction;GO:0043232;GO:0005924//cell-substrate adherens junction;GO:0043232;GO:0005924//cell-substrate adherens junction;GO:0043232;GO:0005924//cell-substrate adherens junction;GO:0043232;GO:0005924//cell-substrate adherens junction;GO:0043232;GO:0005924//cell-substrate adherens junction;GO:0043232;GO:0005924//cell-substrate adherens junction;GO:0043232;GO:0005…	GO:0046914//transition metal ion binding;GO:0046914//transition metal ion binding;GO:0046914//transition metal ion binding;GO:0046914//transition metal ion binding;GO:0046914//transition metal ion binding;GO:0046914//transition metal ion binding;GO:0046914//transition metal ion binding;GO:0046914//transition metal ion binding	-	gi|530422935|ref|XP_005274803.1|/0/PREDICTED: zinc finger protein 185 isoform X19 [Homo sapiens]
100507607	1491	0.87	1.7825	1.03481	Up	0.992222	NPIPB9	1	K01896|1|2e-08|63.2|cge:100767739|medium-chain acyl-CoA synthetase [EC:6.2.1.2]	-	-	-	gi|767988168|ref|XP_011543995.1|/0/PREDICTED: nuclear pore complex-interacting protein family member B9 isoform X4 [Homo sapiens]
1	1766	0.5575	1.1425	1.03515	Up	0.992455	A1BG	3	K06512|1|3e-33|145|phd:102339299|leukocyte immunoglobulin-like receptor	-	-	-	gi|21071030|ref|NP_570602.2|/0/alpha-1B-glycoprotein precursor [Homo sapiens]
27031	5418	3.345	6.855	1.03515	Up	0.999368	NPHP3	4	K19360|1|0.0|2433|hsa:27031|nephrocystin-3	GO:0042995//cell projection	GO:0005488//binding	GO:0060071//Wnt signaling pathway, planar cell polarity pathway;GO:0045596//negative regulation of cell differentiation;GO:0043954//cellular component maintenance;GO:0030178//negative regulation of Wnt signaling pathway	gi|34304360|ref|NP_694972.3|/0/nephrocystin-3 [Homo sapiens]
57758	4589.51	12.5925	25.8075	1.03523	Up	0.999182	SCUBE2	1	K06825|1|2e-86|323|sko:100374579|fibrillin 1	-	GO:0046872//metal ion binding	-	gi|283046665|ref|NP_001164161.1|/0/signal peptide, CUB and EGF-like domain-containing protein 2 isoform 2 precursor [Homo sapiens]
341640	16179	16.275	33.385	1.03654	Up	0.999966	FREM2	5	K08115|1|1e-62|247|tru:101065472|chondroitin sulfate proteoglycan 4	GO:0031224//intrinsic component of membrane;GO:0005578//proteinaceous extracellular matrix	GO:0046872//metal ion binding	GO:0032501//multicellular organismal process;GO:0016337//single organismal cell-cell adhesion	gi|119629013|gb|EAX08608.1|/0/FRAS1 related extracellular matrix protein 2, isoform CRA_b [Homo sapiens]
8491	4311.16	25	51.35	1.03844	Up	1	MAP4K3	1	K04406|1|0.0|1659|nle:100591188|mitogen-activated protein kinase kinase kinase kinase 3 [EC:2.7.11.1]	-	GO:0004672//protein kinase activity;GO:0030695//GTPase regulator activity;GO:0032559//adenyl ribonucleotide binding;GO:0004672//protein kinase activity;GO:0030695//GTPase regulator activity;GO:0032559//adenyl ribonucleotide binding	GO:0000165//MAPK cascade;GO:0006464//cellular protein modification process;GO:0000165//MAPK cascade;GO:0006464//cellular protein modification process	gi|15451902|ref|NP_003609.2|/0/mitogen-activated protein kinase kinase kinase kinase 3 isoform 1 [Homo sapiens]
27330	8234.93	0.58	1.1925	1.03986	Up	0.997062	RPS6KA6	4	K04373|1|0.0|1487|mcc:710337|p90 ribosomal S6 kinase [EC:2.7.11.1]	GO:0031981//nuclear lumen;GO:0044444//cytoplasmic part	GO:0004672//protein kinase activity;GO:0046872//metal ion binding;GO:0032559//adenyl ribonucleotide binding	GO:0035556//intracellular signal transduction;GO:0007267//cell-cell signaling;GO:0006796//phosphate-containing compound metabolic process;GO:0006935//chemotaxis;GO:0007399//nervous system development;GO:0006464//cellular protein modification process	gi|675768190|ref|XP_008987802.1|/0/PREDICTED: ribosomal protein S6 kinase alpha-6 isoform X3 [Callithrix jacchus]
728739	622	2.3025	4.74	1.04169	Up	0.997991	LOC728739	1	K14801|1|1e-66|238|rro:104674400|pre-rRNA-processing protein TSR4	GO:0043231//intracellular membrane-bounded organelle	GO:0046914//transition metal ion binding	GO:0012501//programmed cell death	gi|21735594|ref|NP_659005.1|/2.7773e-70/programmed cell death protein 2 isoform 2 [Homo sapiens]
4008	6927.11	2.1825	4.4975	1.04314	Up	0.999159	LMO7	1	K06084|1|0.0|2894|hsa:4008|F-box protein 20	-	-	-	gi|33598968|ref|NP_005349.3|/0/LIM domain only protein 7 isoform 1 [Homo sapiens]
26959	2763.93	17.785	36.6525	1.04325	Up	1	HBP1	3	K20225|1|3e-10|70.5|dmo:Dmoj_GI22721|capicua transcriptional repressor	GO:0043231//intracellular membrane-bounded organelle	GO:0003676//nucleic acid binding	GO:0007166//cell surface receptor signaling pathway;GO:0022402//cell cycle process	gi|694923299|ref|XP_009452138.1|/0/PREDICTED: HMG box-containing protein 1 isoform X2 [Pan troglodytes]
10610	2105	28.6175	58.9925	1.04363	Up	0.999958	ST6GALNAC2	2	K06616|1|0.0|766|hsa:10610|alpha-N-acetylgalactosaminide alpha-2,6-sialyltransferase (sialyltransferase 7B) [EC:2.4.99.-]	GO:0031228//intrinsic component of Golgi membrane	GO:0016757//transferase activity, transferring glycosyl groups	GO:0006464//cellular protein modification process	gi|192448440|ref|NP_006447.2|/0/alpha-N-acetylgalactosaminide alpha-2,6-sialyltransferase 2 precursor [Homo sapiens]
4897	6318.71	36.8975	76.09	1.04418	Up	0.999391	NRCAM	1	K06756|1|0.0|2299|ptr:463658|neuronal cell adhesion molecule	GO:0043005//neuron projection;GO:0016021//integral component of membrane;GO:0009986//cell surface;GO:0043005//neuron projection;GO:0016021//integral component of membrane;GO:0009986//cell surface	GO:0008092//cytoskeletal protein binding;GO:0008092//cytoskeletal protein binding	GO:0016477//cell migration;GO:0045161//neuronal ion channel clustering;GO:0001558//regulation of cell growth;GO:0006935//chemotaxis;GO:0045597//positive regulation of cell differentiation;GO:0007155//cell adhesion;GO:0007409//axonogenesis;GO:0033036;GO:0050877//neurological system process;GO:0016477//cell migration;GO:0045161//neuronal ion channel clustering;GO:0001558//regulation of cell growth;…	gi|302191647|ref|NP_001180511.1|/0/neuronal cell adhesion molecule isoform D precursor [Homo sapiens]
665	3501.66	10.1225	20.8925	1.04542	Up	0.999251	BNIP3L	2	K15465|1|9e-96|354|nle:100581402|BCL2/adenovirus E1B 19 kDa protein-interacting protein 3-like	GO:0031224//intrinsic component of membrane;GO:0031966//mitochondrial membrane;GO:0012505//endomembrane system;GO:0031224//intrinsic component of membrane;GO:0031966//mitochondrial membrane;GO:0012505//endomembrane system	GO:0042802//identical protein binding;GO:0046983//protein dimerization activity;GO:0042802//identical protein binding;GO:0046983//protein dimerization activity	GO:0012502//induction of programmed cell death;GO:0006915//apoptotic process;GO:0051704;GO:0010629//negative regulation of gene expression;GO:0007005//mitochondrion organization;GO:0002252;GO:0012502//induction of programmed cell death;GO:0006915//apoptotic process;GO:0051704;GO:0010629//negative regulation of gene expression;GO:0007005//mitochondrion organization;GO:0002252	gi|441621076|ref|XP_003272940.2|/7.66171e-95/PREDICTED: BCL2/adenovirus E1B 19 kDa protein-interacting protein 3-like isoform X1 [Nomascus leucogenys]
401320	3871	0.5825	1.2025	1.04571	Up	0.999048	LOC401320	1	-	-	-	-	gi|51105866|gb|EAL24450.1|/1.29646e-50/hypothetical gene supported by BC016976 [Homo sapiens]
288	7899.27	15.69	32.3975	1.04604	Up	1	ANK3	3	K10380|1|0.0|1883|nle:100586449|ankyrin	GO:0044459;GO:0043232	GO:0005488//binding	GO:0023052//signaling;GO:0051234//establishment of localization	gi|694939988|ref|XP_009456793.1|/0/PREDICTED: ankyrin-3 isoform X33 [Pan troglodytes]
901	5489	4.3475	8.985	1.04733	Up	0.997773	CCNG2	2	K10146|1|7e-172|608|pps:100986996|cyclin G2	GO:0044424	-	GO:0007050//cell cycle arrest;GO:0000087//mitotic M phase	gi|4757936|ref|NP_004345.1|/6.28695e-171/cyclin-G2 [Homo sapiens]
149428	2190.17	2.4675	5.1	1.04745	Up	0.996733	BNIPL	1	K18448|1|0.0|730|rro:104681058|BCL2/adenovirus E1B 19 kDa protein-interacting protein 2	GO:0043231//intracellular membrane-bounded organelle;GO:0044444//cytoplasmic part;GO:0043231//intracellular membrane-bounded organelle;GO:0044444//cytoplasmic part	GO:0005515//protein binding;GO:0005515//protein binding	GO:0008283//cell proliferation;GO:0012502//induction of programmed cell death;GO:0040008//regulation of growth;GO:0008283//cell proliferation;GO:0012502//induction of programmed cell death;GO:0040008//regulation of growth	gi|724938865|ref|XP_010385529.1|/0/PREDICTED: bcl-2/adenovirus E1B 19 kDa-interacting protein 2-like protein [Rhinopithecus roxellana]
57562	7046	0.895	1.85	1.04757	Up	0.99884	CEP126	3	K01064|1|2e-16|92.0|mcf:102130297|wingless-type MMTV integration site family, member 9	-	-	-	gi|612149776|ref|NP_065853.3|/0/centrosomal protein of 126 kDa [Homo sapiens]
101929059	2151	1.2275	2.5375	1.04768	Up	0.996732	ZIM2-AS1	1	-	-	-	-	gi|106322|pir||B34087/1.48615e-95/hypothetical protein (L1H 3' region) - human
10957	2133	11.205	23.1875	1.0492	Up	0.998928	PNRC1	2	K18774|1|3e-138|494|hsa:10957|proline-rich nuclear receptor coactivator 1	-	GO:0005488//binding	-	gi|5802982|ref|NP_006804.1|/2.6488e-137/proline-rich nuclear receptor coactivator 1 [Homo sapiens]
345275	2397	0.5325	1.1025	1.04993	Up	0.997424	HSD17B13	2	K15734|1|2e-50|203|nve:NEMVE_v1g194889|all-trans-retinol dehydrogenase (NAD+) [EC:1.1.1.105]	-	GO:0003824//catalytic activity;GO:0003824//catalytic activity	GO:0008152//metabolic process;GO:0008152//metabolic process	gi|210032110|ref|NP_835236.2|/2.24766e-156/17-beta-hydroxysteroid dehydrogenase 13 isoform A precursor [Homo sapiens]
5241	12222.7	9.0375	18.715	1.0502	Up	0.998666	PGR	2	K08556|1|0.0|1345|hsa:5241|progesterone receptor	GO:0031981//nuclear lumen;GO:0031981//nuclear lumen;GO:0042995//cell projection;GO:0031981//nuclear lumen;GO:0031981//nuclear lumen;GO:0031981//nuclear lumen;GO:0031981//nuclear lumen	GO:0005515//protein binding;GO:0046872//metal ion binding;GO:0003677//DNA binding;GO:0046914//transition metal ion binding;GO:0005515//protein binding;GO:0004879//RNA polymerase II transcription factor activity, ligand-activated sequence-specific DNA binding;GO:0001071//nucleic acid binding transcription factor activity;GO:0003677//DNA binding;GO:0008289//lipid binding;GO:0005515//protein binding…	GO:0003006//developmental process involved in reproduction;GO:0009755//hormone-mediated signaling pathway;GO:0048732//gland development;GO:0007154//cell communication;GO:0048609//multicellular organismal reproductive process;GO:0060429//epithelium development;GO:0042127//regulation of cell proliferation;GO:0003006//developmental process involved in reproduction;GO:0030518//intracellular steroid h…	gi|20278871|dbj|BAB91074.1|/0/delta 4 progesterone receptor [Homo sapiens]
9935	3395	1.8775	3.89	1.05096	Up	0.994896	MAFB	4	K09036|1|5e-126|455|rro:104671242|transcription factor MAFB	GO:0043231//intracellular membrane-bounded organelle	GO:0003677//DNA binding;GO:0005515//protein binding	GO:0007423//sensory organ development;GO:0006355//regulation of transcription, DNA-templated;GO:0045638//negative regulation of myeloid cell differentiation;GO:0021546//rhombomere development;GO:0007389//pattern specification process	gi|724879473|ref|XP_010372973.1|/4.02855e-125/PREDICTED: transcription factor MafB [Rhinopithecus roxellana]
22875	4697	3.59	7.46	1.05519	Up	0.999342	ENPP4	4	K18424|1|0.0|908|hsa:22875|ectonucleotide pyrophosphatase/phosphodiesterase family member 4 [EC:3.6.1.29]	GO:0031224//intrinsic component of membrane	GO:0003824//catalytic activity	-	gi|7662358|ref|NP_055751.1|/0/bis(5'-adenosyl)-triphosphatase ENPP4 precursor [Homo sapiens]
728342	3091	0.6	1.2475	1.05601	Up	0.996963	LINC00992	1	K17985|1|3e-10|70.5|hsa:55626|activating molecule in BECN1-regulated autophagy protein 1;K09228|2|5e-09|66.2|ptr:469069|KRAB domain-containing zinc finger protein	-	-	-	gi|119626382|gb|EAX05977.1|/9.75218e-19/hCG2038848, partial [Homo sapiens]
100616122	69	1.19	2.475	1.05647	Up	0.947762	MIR4523	1	-	-	-	-	-
692211	67	1.6925	3.5225	1.05744	Up	0.924295	SNORD98	1	-	-	-	-	-
2908	6406.24	2.2925	4.7775	1.05933	Up	0.996772	NR3C1	1	K05771|1|0.0|1348|hsa:2908|glucocorticoid receptor	GO:0031981//nuclear lumen;GO:0032991//macromolecular complex;GO:0044429;GO:0031981//nuclear lumen;GO:0032991//macromolecular complex;GO:0044429;GO:0031981//nuclear lumen;GO:0032991//macromolecular complex;GO:0044429;GO:0031981//nuclear lumen;GO:0032991//macromolecular complex;GO:0044429;GO:0031981//nuclear lumen;GO:0032991//macromolecular complex;GO:0044429;GO:0031981//nuclear lumen;GO:0032991//m…	GO:0046914//transition metal ion binding;GO:0005102//receptor binding;GO:0003707//steroid hormone receptor activity;GO:0001071//nucleic acid binding transcription factor activity;GO:0046983//protein dimerization activity;GO:0042802//identical protein binding;GO:0008289//lipid binding;GO:0043566//structure-specific DNA binding;GO:0046914//transition metal ion binding;GO:0005102//receptor binding;G…	GO:0006094//gluconeogenesis;GO:0006704//glucocorticoid biosynthetic process;GO:0007179//transforming growth factor beta receptor signaling pathway;GO:0008283//cell proliferation;GO:0021987//cerebral cortex development;GO:0043401//steroid hormone mediated signaling pathway;GO:0006338//chromatin remodeling;GO:0060562//epithelial tube morphogenesis;GO:0010035//response to inorganic substance;GO:0035…	gi|34364621|emb|CAE45716.1|/0/hypothetical protein [Homo sapiens]
100132832	2332	5.09	10.6075	1.05935	Up	0.999273	PMS2P9	1	K10858|1|9e-89|207|ggo:101138225|DNA mismatch repair protein PMS2	GO:0032300//mismatch repair complex	GO:0016772//transferase activity, transferring phosphorus-containing groups;GO:0017111//nucleoside-triphosphatase activity;GO:0003690//double-stranded DNA binding;GO:0032559//adenyl ribonucleotide binding	GO:0006310//DNA recombination;GO:0006281//DNA repair;GO:0002566//somatic diversification of immune receptors via somatic mutation;GO:0009207	gi|426356480|ref|XP_004045595.1|/7.61859e-88/PREDICTED: postmeiotic segregation increased 4-like protein-like [Gorilla gorilla gorilla]
2329	2321	0.7375	1.5375	1.05987	Up	0.997434	FMO4	2	K00485|1|0.0|1107|hsa:2329|dimethylaniline monooxygenase (N-oxide forming) [EC:1.14.13.8]	GO:0005789//endoplasmic reticulum membrane;GO:0031224//intrinsic component of membrane	GO:0016709//oxidoreductase activity, acting on paired donors, with incorporation or reduction of molecular oxygen, NAD(P)H as one donor, and incorporation of one atom of oxygen;GO:0050662//coenzyme binding;GO:0000166//nucleotide binding	GO:0044237//cellular metabolic process	gi|4503759|ref|NP_002013.1|/0/dimethylaniline monooxygenase [N-oxide-forming] 4 [Homo sapiens]
100093631	3645	30.3225	63.215	1.05988	Up	0.996799	GTF2IP4	2	K03121|1|0.0|1338|pps:100977963|transcription initiation factor TFII-I	GO:0031981//nuclear lumen;GO:0044297//cell body	GO:0003676//nucleic acid binding;GO:0001071//nucleic acid binding transcription factor activity;GO:0019901//protein kinase binding	GO:0006352//DNA-templated transcription, initiation;GO:0023052//signaling;GO:0007275//multicellular organism development	gi|795302366|ref|XP_011815975.1|/0/PREDICTED: general transcription factor II-I isoform X1 [Colobus angolensis palliatus]
100132288	1437.35	0.855	1.7825	1.05991	Up	0.996389	TEKT4P2	2	-	GO:0043229//intracellular organelle;GO:0042995//cell projection;GO:0005930//axoneme;GO:0015630//microtubule cytoskeleton	-	GO:0007010//cytoskeleton organization	gi|119571882|gb|EAW51497.1|/2.17916e-17/hCG2045901 [Homo sapiens]
100422936	82	0.8475	1.7675	1.06042	Up	0.857376	MIR3153	1	-	-	-	-	-
150935	1019	1.065	2.2225	1.06133	Up	0.99813	LOC150935	1	-	-	-	-	gi|119591576|gb|EAW71170.1|/5.71349e-58/hCG2012811, partial [Homo sapiens]
8614	5361	134.273	280.317	1.0619	Up	1	STC2	2	-	-	GO:0005102//receptor binding	GO:0009725//response to hormone;GO:0007275//multicellular organism development;GO:0003006//developmental process involved in reproduction;GO:0007165//signal transduction;GO:0001666//response to hypoxia;GO:0033273//response to vitamin;GO:0007154//cell communication	gi|4507267|ref|NP_003705.1|/2.5675e-177/stanniocalcin-2 precursor [Homo sapiens]
727764	1695.12	2.5875	5.4075	1.0634	Up	0.997361	MAFIP	2	-	GO:0005930//axoneme;GO:0015630//microtubule cytoskeleton;GO:0005930//axoneme;GO:0015630//microtubule cytoskeleton	-	GO:0007010//cytoskeleton organization;GO:0007010//cytoskeleton organization	gi|74356358|gb|AAI04659.1|/7.87323e-102/LOC389833 protein, partial [Homo sapiens]
10761	1130.13	0.7225	1.51	1.06348	Up	0.971986	PLAC1	3	-	-	-	GO:0048513//animal organ development;GO:0048513//animal organ development;GO:0048513//animal organ development	gi|11496283|ref|NP_068568.1|/2.65097e-122/placenta-specific protein 1 precursor [Homo sapiens]
106146148	572	0.9825	2.055	1.06461	Up	0.986401	LINC01297	1	-	-	-	-	gi|119632093|gb|EAX11688.1|/1.59939e-24/hCG2041994, partial [Homo sapiens]
57659	5909.65	8.0625	16.9025	1.06794	Up	1	ZBTB4	3	K10491|1|0.0|1123|hsa:57659|zinc finger and BTB domain-containing protein 4	-	GO:0005488//binding;GO:0005488//binding	-	gi|192807284|ref|NP_065950.2|/0/zinc finger and BTB domain-containing protein 4 [Homo sapiens]
84448	2965.07	1.0625	2.2275	1.06796	Up	0.997318	ABLIM2	1	K07520|1|4e-180|634|hsa:84448|actin-binding LIM protein	GO:0005856//cytoskeleton;GO:0031981//nuclear lumen;GO:0005856//cytoskeleton;GO:0031981//nuclear lumen;GO:0005856//cytoskeleton;GO:0031981//nuclear lumen;GO:0005856//cytoskeleton;GO:0031981//nuclear lumen;GO:0005856//cytoskeleton;GO:0031981//nuclear lumen;GO:0005856//cytoskeleton;GO:0031981//nuclear lumen	GO:0008092//cytoskeletal protein binding;GO:0046914//transition metal ion binding;GO:0046914//transition metal ion binding;GO:0046914//transition metal ion binding;GO:0008092//cytoskeletal protein binding;GO:0046914//transition metal ion binding;GO:0008092//cytoskeletal protein binding;GO:0046914//transition metal ion binding;GO:0008092//cytoskeletal protein binding;GO:0046914//transition metal i…	GO:0006996//organelle organization;GO:0006935//chemotaxis;GO:0006935//chemotaxis;GO:0006996//organelle organization;GO:0006935//chemotaxis;GO:0006996//organelle organization;GO:0006996//organelle organization;GO:0006935//chemotaxis;GO:0006996//organelle organization;GO:0006935//chemotaxis;GO:0006996//organelle organization;GO:0006935//chemotaxis	gi|194272204|ref|NP_001123559.1|/0/actin-binding LIM protein 2 isoform 5 [Homo sapiens]
389015	4174	8.8625	18.58	1.06796	Up	1	SLC9A4	3	K13961|1|0.0|1357|hsa:389015|solute carrier family 9 (sodium/hydrogen exchanger), member 4	GO:0044459;GO:0031224//intrinsic component of membrane	GO:0005451//monovalent cation:proton antiporter activity	GO:0055067;GO:0030001//metal ion transport	gi|148727259|ref|NP_001011552.2|/0/sodium/hydrogen exchanger 4 precursor [Homo sapiens]
285989	1290.18	4.405	9.235	1.06797	Up	0.999901	ZNF789	2	K09228|1|4e-105|384|umr:103669989|KRAB domain-containing zinc finger protein	GO:0043231//intracellular membrane-bounded organelle	GO:0046914//transition metal ion binding;GO:0003676//nucleic acid binding	GO:0006351//transcription, DNA-templated	gi|795299624|ref|XP_011767114.1|/8.30273e-38/PREDICTED: zinc finger protein 789 isoform X6 [Macaca nemestrina]
6080	207	3.16	6.6275	1.06854	Up	0.907733	SNORA73A	2	K17585|1|1e-06|53.9|lve:103088203|phosphatase and actin regulator 4	-	-	-	gi|602699793|ref|XP_007461897.1|/9.77322e-06/PREDICTED: phosphatase and actin regulator 4 [Lipotes vexillifer]
102723809	561	0.56	1.175	1.06916	Up	0.990588	LOC102723809	1	-	-	-	-	-
4121	5044	24.1	50.58	1.06953	Up	0.999762	MAN1A1	3	K01230|1|0.0|1316|rro:104670284|mannosyl-oligosaccharide alpha-1,2-mannosidase [EC:3.2.1.113]	GO:0012505//endomembrane system;GO:0043231//intracellular membrane-bounded organelle;GO:0031224//intrinsic component of membrane;GO:0044444//cytoplasmic part	GO:0046872//metal ion binding;GO:0015924//mannosyl-oligosaccharide mannosidase activity	GO:0006487//protein N-linked glycosylation	gi|530383710|ref|XP_005267043.1|/0/PREDICTED: mannosyl-oligosaccharide 1,2-alpha-mannosidase IA isoform X1 [Homo sapiens]
102465874	80	0.885	1.8575	1.06961	Up	0.943728	MIR8075	1	-	-	-	-	-
54800	7331	2.235	4.6925	1.07008	Up	0.996993	KLHL24	3	K10461|1|0.0|1201|rro:104664645|kelch-like protein 24/35	GO:0044424;GO:0043025//neuronal cell body;GO:0043005//neuron projection	-	-	gi|26381170|dbj|BAB29759.2|/0/unnamed protein product [Mus musculus]
153222	6252.6	1.3	2.73	1.07039	Up	0.997526	CREBRF	2	-	-	GO:0003677//DNA binding;GO:0001071//nucleic acid binding transcription factor activity;GO:0003677//DNA binding;GO:0001071//nucleic acid binding transcription factor activity;GO:0003677//DNA binding;GO:0001071//nucleic acid binding transcription factor activity	GO:0006351//transcription, DNA-templated;GO:0006351//transcription, DNA-templated;GO:0006351//transcription, DNA-templated	gi|270309176|ref|NP_705835.2|/0/CREB3 regulatory factor isoform 1 [Homo sapiens]
54407	4929.57	63.7875	134.01	1.071	Up	1	SLC38A2	4	K14207|1|0.0|783|pps:100975486|solute carrier family 38 (sodium-coupled neutral amino acid transporter), member 2	GO:0031224//intrinsic component of membrane;GO:0031224//intrinsic component of membrane	GO:0015291//secondary active transmembrane transporter activity;GO:0005275//amine transmembrane transporter activity;GO:0015291//secondary active transmembrane transporter activity;GO:0005275//amine transmembrane transporter activity	GO:0001505//regulation of neurotransmitter levels;GO:0023061//signal release;GO:0006865//amino acid transport;GO:0006807//nitrogen compound metabolic process;GO:0030001//metal ion transport;GO:0001505//regulation of neurotransmitter levels;GO:0023061//signal release;GO:0006865//amino acid transport;GO:0006807//nitrogen compound metabolic process;GO:0030001//metal ion transport	gi|21361602|ref|NP_061849.2|/0/sodium-coupled neutral amino acid transporter 2 isoform 1 [Homo sapiens]
101927796	2290	0.6375	1.34	1.07174	Up	0.997583	LINC01441	1	K17985|1|3e-24|83.2|hsa:55626|activating molecule in BECN1-regulated autophagy protein 1;K15696|4|1e-19|74.7|nle:100581015|RING finger protein 113B	-	-	-	gi|355755786|gb|EHH59533.1|/8.40175e-36/hypothetical protein EGM_09670, partial [Macaca fascicularis]
401145	5239.15	0.875	1.84	1.07235	Up	0.998757	CCSER1	1	-	-	-	-	gi|46575934|ref|NP_997374.1|/0/serine-rich coiled-coil domain-containing protein 1 isoform 2 [Homo sapiens]
3398	1402	45.535	95.765	1.07252	Up	1	ID2	4	K17693|1|3e-79|298|rro:104675219|DNA-binding protein inhibitor ID2	GO:0031981//nuclear lumen;GO:0032991//macromolecular complex;GO:0044427;GO:0044444//cytoplasmic part	GO:0005488//binding	GO:0060644//mammary gland epithelial cell differentiation;GO:0009605//response to external stimulus;GO:0006357//regulation of transcription from RNA polymerase II promoter;GO:0001822//kidney development;GO:0048562//embryonic organ morphogenesis;GO:0045686//negative regulation of glial cell differentiation;GO:0010033//response to organic substance;GO:0050673//epithelial cell proliferation;GO:00027…	gi|724904319|ref|XP_010377995.1|/2.75382e-78/PREDICTED: DNA-binding protein inhibitor ID-2 [Rhinopithecus roxellana]
10974	672	51.8975	109.21	1.07337	Up	0.994615	ADIRF	2	-	-	-	-	gi|343960709|dbj|BAK61944.1|/3.38748e-18/hypothetical protein [Pan troglodytes]
8360	367	0.81	1.705	1.07378	Up	0.964082	HIST1H4D	3	K11254|1|2e-41|169|cge:100755357|histone H4	GO:0000785//chromatin;GO:0043231//intracellular membrane-bounded organelle	GO:0003676//nucleic acid binding	GO:0034728//nucleosome organization	gi|444523279|gb|ELV13502.1|/3.18885e-41/Histone H2B type 1-M [Tupaia chinensis]
118980	2562	28.9775	61.1225	1.07677	Up	1	SFXN2	4	K03351|1|5e-77|291|smm:Smp_136960|anaphase-promoting complex subunit 4;K01064|2|1e-17|65.5|mcc:716877|wingless-type MMTV integration site family, member 9;K17985|5|2e-17|94.4|hsa:55626|activating molecule in BECN1-regulated autophagy protein 1	GO:0019866//organelle inner membrane;GO:0043231//intracellular membrane-bounded organelle;GO:0031224//intrinsic component of membrane	GO:0015075//ion transmembrane transporter activity	GO:0000041//transition metal ion transport	gi|817337370|ref|XP_012294969.1|/0/PREDICTED: sideroflexin-2 isoform X1 [Aotus nancymaae]
858	3120.78	5.2725	11.125	1.07725	Up	0.998947	CAV2	1	K12958|1|3e-89|332|pps:100992816|caveolin 2	GO:0032991//macromolecular complex;GO:0016023//cytoplasmic, membrane-bounded vesicle;GO:0016021//integral component of membrane;GO:0012505//endomembrane system;GO:0009898//cytoplasmic side of plasma membrane;GO:0032991//macromolecular complex;GO:0016023//cytoplasmic, membrane-bounded vesicle;GO:0016021//integral component of membrane;GO:0012505//endomembrane system;GO:0009898//cytoplasmic side of…	GO:0000149//SNARE binding;GO:0042802//identical protein binding;GO:0050780//dopamine receptor binding;GO:0000149//SNARE binding;GO:0042802//identical protein binding;GO:0050780//dopamine receptor binding;GO:0000149//SNARE binding;GO:0042802//identical protein binding;GO:0050780//dopamine receptor binding	GO:0007267//cell-cell signaling;GO:0006461//protein complex assembly;GO:0001935//endothelial cell proliferation;GO:0001765//membrane raft assembly;GO:0048747//muscle fiber development;GO:0045745//positive regulation of G-protein coupled receptor protein signaling pathway;GO:0022406//membrane docking;GO:0016192//vesicle-mediated transport;GO:0007067//mitotic nuclear division;GO:0007267//cell-cell …	gi|795142184|ref|XP_011792810.1|/3.82139e-63/PREDICTED: caveolin-2 [Colobus angolensis palliatus]
8322	7394	4.355	9.1925	1.07778	Up	0.998947	FZD4	3	K02354|1|0.0|1046|pps:100984214|frizzled 4	GO:0016021//integral component of membrane;GO:0044424	GO:0046983//protein dimerization activity;GO:0019904//protein domain specific binding;GO:0042802//identical protein binding;GO:0004888//transmembrane signaling receptor activity	GO:0007626//locomotory behavior;GO:0007417//central nervous system development;GO:0006357//regulation of transcription from RNA polymerase II promoter;GO:0032526//response to retinoic acid;GO:0001944//vasculature development;GO:0007162//negative regulation of cell adhesion;GO:0007154//cell communication;GO:0050954//sensory perception of mechanical stimulus;GO:0035567//non-canonical Wnt signaling …	gi|22547161|ref|NP_036325.2|/0/frizzled-4 precursor [Homo sapiens]
79983	3518.59	22.33	47.1475	1.0782	Up	0.999907	POF1B	3	K04514|1|9e-09|65.9|dre:321070|Rho-associated protein kinase 1 [EC:2.7.11.1];K16469|2|2e-08|65.1|loa:LOAG_05405|rootletin;K11499|3|1e-07|62.4|ngi:103727068|centromere protein F;K20478|4|1e-07|62.0|aam:106496145|golgin subfamily B member 1;K18806|5|1e-07|62.0|rro:104674349|kinesin family member 7	-	GO:0008092//cytoskeletal protein binding;GO:0008092//cytoskeletal protein binding	-	gi|193794853|ref|NP_079197.3|/0/protein POF1B isoform 1 [Homo sapiens]
103191607	839	0.56	1.1825	1.07834	Up	0.98462	LOC103191607	1	-	-	-	-	gi|106322|pir||B34087/9.75923e-20/hypothetical protein (L1H 3' region) - human
414766	676	1.2925	2.73	1.07874	Up	0.996645	HCG16	1	K17985|1|6e-10|52.4|hsa:55626|activating molecule in BECN1-regulated autophagy protein 1;K04613|3|7e-09|62.8|nle:100592151|vomeronasal 2 receptor;K09228|4|7e-09|62.8|pps:100985752|KRAB domain-containing zinc finger protein;K15289|5|1e-08|62.0|ggo:101143670|solute carrier family 35, member F5	-	-	-	gi|11493409|gb|AAG35479.1|AF130117_10/4.42631e-21/PRO0898 [Homo sapiens]
728378	4337	0.7625	1.6125	1.08049	Up	0.993585	POTEF	2	K17299|1|0.0|2163|hsa:728378|POTE ankyrin domain family protein	GO:0044444//cytoplasmic part	GO:0032559//adenyl ribonucleotide binding	-	gi|153791352|ref|NP_001093241.1|/0/POTE ankyrin domain family member F [Homo sapiens]
54065	917	1.305	2.76	1.08062	Up	0.875558	SMIM11A	4	K12581|1|9e-23|99.4|nle:100584332|CCR4-NOT transcription complex subunit 7/8;K17985|3|1e-21|105|hsa:55626|activating molecule in BECN1-regulated autophagy protein 1;K01064|4|4e-21|104|mcf:102130297|wingless-type MMTV integration site family, member 9	-	-	-	gi|768019932|ref|XP_011544413.1|/3.67711e-34/PREDICTED: uncharacterized protein LOC102723553 [Homo sapiens]
23678	4254.34	8.405	17.785	1.08134	Up	0.999998	SGK3	4	K13304|1|0.0|901|nle:100586435|serum/glucocorticoid-regulated kinase 3 [EC:2.7.11.1]	GO:0005768//endosome;GO:0031410//cytoplasmic vesicle;GO:0005768//endosome;GO:0031410//cytoplasmic vesicle;GO:0005768//endosome;GO:0031410//cytoplasmic vesicle	GO:0005543//phospholipid binding;GO:0004672//protein kinase activity;GO:0032559//adenyl ribonucleotide binding;GO:0005543//phospholipid binding;GO:0004672//protein kinase activity;GO:0032559//adenyl ribonucleotide binding;GO:0005543//phospholipid binding;GO:0004672//protein kinase activity;GO:0032559//adenyl ribonucleotide binding	GO:0050896//response to stimulus;GO:0006464//cellular protein modification process;GO:0050896//response to stimulus;GO:0006464//cellular protein modification process;GO:0050896//response to stimulus;GO:0006464//cellular protein modification process	gi|31563383|ref|NP_733827.2|/0/serine/threonine-protein kinase Sgk3 isoform 2 [Homo sapiens]
101929066	1483.98	0.5125	1.085	1.08207	Up	0.989084	LOC101929066	1	K02963|1|3e-14|79.0|myb:102249078|small subunit ribosomal protein S18	GO:0000314//organellar small ribosomal subunit;GO:0043231//intracellular membrane-bounded organelle	GO:0005198//structural molecule activity	GO:0010467//gene expression	gi|74751087|sp|Q8N7I0.1|GVQW1_HUMAN/9.69981e-25/RecName: Full=Protein GVQW1; AltName: Full=GVQW motif-containing protein 1; AltName: Full=Tigger transposable element-derived 1-like protein 2; Flags: Precursor
103352539	2877	0.6375	1.35	1.08246	Up	0.997386	LINC01410	1	-	-	-	-	gi|119589302|gb|EAW68896.1|/1.02958e-33/hCG1817947, isoform CRA_b [Homo sapiens]
100188947	1038	1.2375	2.6225	1.08351	Up	0.996569	HECTD2-AS1	1	-	-	-	-	gi|119580432|gb|EAW60028.1|/6.16368e-15/hCG1820544 [Homo sapiens]
101928079	1331	0.645	1.3675	1.08417	Up	0.997526	LINC01057	1	-	-	-	-	gi|119580432|gb|EAW60028.1|/2.46244e-31/hCG1820544 [Homo sapiens]
101929152	730	3.49	7.4	1.0843	Up	0.998507	P3H2-AS1	1	K09228|1|4e-13|77.0|pps:100985752|KRAB domain-containing zinc finger protein;K17776|2|4e-13|43.5|nle:100591060|metaxin;K17985|5|5e-13|65.9|hsa:55626|activating molecule in BECN1-regulated autophagy protein 1	-	-	-	gi|767896552|ref|XP_011506841.1|/3.44273e-17/PREDICTED: putative uncharacterized protein encoded by LINC00596, partial [Homo sapiens]
105379477	1902	0.9	1.91	1.08558	Up	0.99887	LOC105379477	1	K13122|1|4e-39|165|ggo:101136513|protein FRG1	-	-	-	gi|426391239|ref|XP_004061985.1|/1.73791e-68/PREDICTED: uncharacterized protein LOC101135305 isoform 1 [Gorilla gorilla gorilla]
644794	2195	0.795	1.6875	1.08586	Up	0.9921	LOC644794	1	-	-	-	-	gi|221043496|dbj|BAH13425.1|/2.50874e-106/unnamed protein product [Homo sapiens]
8000	1050.41	6.16	13.0825	1.08664	Up	0.999	PSCA	1	K06846|1|7e-08|60.8|mgp:104910461|lymphocyte antigen 6 complex locus protein D/E/G6/H	GO:0031224//intrinsic component of membrane;GO:0031224//intrinsic component of membrane	-	-	gi|37182942|gb|AAQ89271.1|/2.24765e-41/prostate stem cell A [Homo sapiens]
195814	3544.65	0.8075	1.7175	1.08878	Up	0.997334	SDR16C5	3	K15734|1|6e-167|591|hsa:195814|all-trans-retinol dehydrogenase (NAD+) [EC:1.1.1.105]	GO:0031224//intrinsic component of membrane;GO:0043231//intracellular membrane-bounded organelle;GO:0031090//organelle membrane;GO:0031224//intrinsic component of membrane;GO:0043231//intracellular membrane-bounded organelle;GO:0031090//organelle membrane;GO:0031224//intrinsic component of membrane;GO:0043231//intracellular membrane-bounded organelle;GO:0031090//organelle membrane	GO:0016616//oxidoreductase activity, acting on the CH-OH group of donors, NAD or NADP as acceptor;GO:0016616//oxidoreductase activity, acting on the CH-OH group of donors, NAD or NADP as acceptor;GO:0016616//oxidoreductase activity, acting on the CH-OH group of donors, NAD or NADP as acceptor	GO:0001523//retinoid metabolic process;GO:0009584//detection of visible light;GO:0008283//cell proliferation;GO:0001523//retinoid metabolic process;GO:0009584//detection of visible light;GO:0008283//cell proliferation;GO:0001523//retinoid metabolic process;GO:0009584//detection of visible light;GO:0008283//cell proliferation	gi|968121886|ref|NP_001304978.1|/5.14658e-166/epidermal retinol dehydrogenase 2 isoform 1 [Homo sapiens]
6446	2416.56	5.975	12.7175	1.0898	Up	0.99893	SGK1	1	K13302|1|0.0|772|nle:100586194|serum/glucocorticoid-regulated kinase 1 [EC:2.7.11.1]	GO:0043231//intracellular membrane-bounded organelle;GO:0016020//membrane;GO:0043231//intracellular membrane-bounded organelle;GO:0016020//membrane;GO:0043231//intracellular membrane-bounded organelle;GO:0016020//membrane	GO:0004672//protein kinase activity;GO:0032559//adenyl ribonucleotide binding;GO:0004672//protein kinase activity;GO:0032559//adenyl ribonucleotide binding;GO:0004672//protein kinase activity;GO:0032559//adenyl ribonucleotide binding	GO:0050896//response to stimulus;GO:0006464//cellular protein modification process;GO:0012501//programmed cell death;GO:0030001//metal ion transport;GO:0050896//response to stimulus;GO:0006464//cellular protein modification process;GO:0012501//programmed cell death;GO:0030001//metal ion transport;GO:0050896//response to stimulus;GO:0006464//cellular protein modification process;GO:0012501//progra…	gi|829925397|ref|XP_012594934.1|/0/PREDICTED: serine/threonine-protein kinase Sgk1 isoform X1 [Microcebus murinus]
225689	1904	0.6775	1.4425	1.09028	Up	0.941235	MAPK15	2	K19603|1|0.0|1038|hsa:225689|mitogen-activated protein kinase 15 [EC:2.7.11.24]	GO:0044464	GO:0019904//protein domain specific binding;GO:0004702//receptor signaling protein serine/threonine kinase activity;GO:0032559//adenyl ribonucleotide binding	GO:0006468//protein phosphorylation	gi|95147356|ref|NP_620590.2|/0/mitogen-activated protein kinase 15 [Homo sapiens]
619383	353	0.6375	1.3575	1.09045	Up	0.968879	SCARNA9	2	-	-	-	-	-
84960	1727	0.61	1.3	1.09163	Up	0.993963	CCDC183	4	K16308|1|7e-08|61.6|dre:100333880|citron Rho-interacting kinase [EC:2.7.11.1];K10402|2|1e-06|57.8|dre:449979|kinesin family member 20;K16551|3|2e-06|57.0|crg:105330473|A-kinase anchor protein 9;K09291|4|2e-06|57.0|dse:Dsec_GM21310|nucleoprotein TPR	-	-	-	gi|289547545|ref|NP_001034463.4|/0/coiled-coil domain-containing protein 183 [Homo sapiens]
83959	3168.94	2.1275	4.535	1.09194	Up	0.998733	SLC4A11	1	K13862|1|0.0|1686|ptr:458058|solute carrier family 4 (sodium borate transporter), member 11	GO:0031224//intrinsic component of membrane;GO:0044459;GO:0031224//intrinsic component of membrane;GO:0044459;GO:0031224//intrinsic component of membrane;GO:0044459	GO:0015103//inorganic anion transmembrane transporter activity;GO:0005402//cation:sugar symporter activity;GO:0005261//cation channel activity;GO:0015301//anion:anion antiporter activity;GO:0015103//inorganic anion transmembrane transporter activity;GO:0005402//cation:sugar symporter activity;GO:0005261//cation channel activity;GO:0015301//anion:anion antiporter activity;GO:0015103//inorganic ani…	GO:0006818//hydrogen transport;GO:0015698//inorganic anion transport;GO:0006873//cellular ion homeostasis;GO:0008643//carbohydrate transport;GO:0034220//ion transmembrane transport;GO:0030001//metal ion transport;GO:0006818//hydrogen transport;GO:0015698//inorganic anion transport;GO:0006873//cellular ion homeostasis;GO:0008643//carbohydrate transport;GO:0034220//ion transmembrane transport;GO:00…	gi|14042960|ref|NP_114423.1|/0/sodium bicarbonate transporter-like protein 11 isoform 2 [Homo sapiens]
123872	1808.08	1.0925	2.33	1.0927	Up	0.992775	DNAAF1	1	K19750|1|0.0|1285|hsa:123872|dynein assembly factor 1, axonemal	GO:0005930//axoneme;GO:0005819//spindle;GO:0005930//axoneme;GO:0005819//spindle	GO:0005515//protein binding;GO:0005515//protein binding	GO:0048858//cell projection morphogenesis;GO:0043623//cellular protein complex assembly;GO:0048858//cell projection morphogenesis;GO:0043623//cellular protein complex assembly	gi|767989368|ref|XP_011521157.1|/0/PREDICTED: dynein assembly factor 1, axonemal isoform X6 [Homo sapiens]
767846	1906	9.26	19.755	1.09313	Up	1	PFN1P2	3	K05759|1|2e-78|295|ptr:737948|profilin	GO:0043231//intracellular membrane-bounded organelle;GO:0005856//cytoskeleton;GO:0044444//cytoplasmic part	GO:0035091//phosphatidylinositol binding;GO:0008092//cytoskeletal protein binding;GO:0017016//Ras GTPase binding	GO:0070848//response to growth factor;GO:0032233//positive regulation of actin filament bundle assembly;GO:0014020;GO:0006357//regulation of transcription from RNA polymerase II promoter;GO:0030832//regulation of actin filament length;GO:0010604;GO:0045935	gi|694887913|ref|XP_003949545.2|/2.04817e-77/PREDICTED: LOW QUALITY PROTEIN: profilin-1 [Pan troglodytes]
113791	2478	1.5375	3.285	1.09531	Up	0.998865	PIK3IP1	1	K01343|1|3e-08|63.2|cfr:102507711|tissue plasminogen activator [EC:3.4.21.68]	GO:0031224//intrinsic component of membrane;GO:0031224//intrinsic component of membrane	-	-	gi|51317358|ref|NP_443112.2|/5.24047e-140/phosphoinositide-3-kinase-interacting protein 1 isoform 1 precursor [Homo sapiens]
254827	4912	1.53	3.27	1.09576	Up	0.996003	NAALADL2	2	K01301|1|0.0|1516|hsa:254827|N-acetylated-alpha-linked acidic dipeptidase [EC:3.4.17.21]	GO:0031224//intrinsic component of membrane	GO:0016787//hydrolase activity	GO:0019538//protein metabolic process	gi|126157508|ref|NP_996898.2|/0/inactive N-acetylated-alpha-linked acidic dipeptidase-like protein 2 [Homo sapiens]
641515	2819	0.725	1.55	1.09622	Up	0.997374	MGAT4EP	2	K13748|1|4e-64|228|pss:102462087|alpha-1,3-mannosylglycoprotein beta-1,4-N-acetylglucosaminyltransferase C [EC:2.4.1.201 2.4.1.145]	-	-	-	gi|931565176|ref|XP_003823055.2|/0/PREDICTED: alpha-1,3-mannosyl-glycoprotein 4-beta-N-acetylglucosaminyltransferase-like protein MGAT4E [Pan paniscus]
653149	2222	1.485	3.1775	1.09743	Up	0.996221	NBPF6	1	K16549|1|2e-12|77.0|ngi:103731999|myomegalin	GO:0044424;GO:0044424	-	-	gi|530363207|ref|XP_005271201.1|/0/PREDICTED: neuroblastoma breakpoint family member 6 isoform X1 [Homo sapiens]
10156	5606	1.4425	3.0875	1.09787	Up	0.997528	RASA4	5	K17630|1|0.0|1588|hsa:10156|Ras GTPase-activating protein 4	GO:0044444//cytoplasmic part;GO:0016020//membrane;GO:0044444//cytoplasmic part;GO:0016020//membrane	GO:0008047//enzyme activator activity;GO:0043169//cation binding;GO:0008047//enzyme activator activity;GO:0043169//cation binding	GO:0009966//regulation of signal transduction;GO:0009966//regulation of signal transduction	gi|299829177|ref|NP_008920.5|/0/ras GTPase-activating protein 4 isoform 1 [Homo sapiens]
8358	472	0.9375	2.0075	1.09851	Up	0.89985	HIST1H3B	3	K11253|1|1e-70|266|tup:102471222|histone H3	-	-	-	gi|852803759|ref|XP_012890639.1|/2.08225e-72/PREDICTED: LOW QUALITY PROTEIN: uncharacterized protein LOC106000001 [Dipodomys ordii]
57119	1998	1.5225	3.2625	1.09954	Up	0.998663	EPPIN	3	K15619|1|2e-11|73.9|xma:102223662|Kunitz-type protease inhibitor 1	-	GO:0004866//endopeptidase inhibitor activity	-	gi|106322|pir||B34087/1.56467e-75/hypothetical protein (L1H 3' region) - human
105375297	564	0.9225	1.9775	1.10006	Up	0.996671	LOC105375297	1	-	-	-	-	gi|982277959|ref|XP_015285435.1|/2.1237e-74/PREDICTED: leucine-rich repeat extensin-like protein 5 [Macaca fascicularis]
101752399	3403.35	10.6225	22.7775	1.10049	Up	0.99928	STAG3L5P-PVRIG2P-PILRB	1	K13055|1|2e-79|290|tup:102498657|cohesin complex subunit SA-3;K15411|4|3e-37|160|nle:100588022|paired immunoglobulin-like type 2 receptor alpha	GO:0031224//intrinsic component of membrane;GO:0016021//integral component of membrane	GO:0005488//binding	GO:0007169//transmembrane receptor protein tyrosine kinase signaling pathway	gi|694922968|ref|XP_009452063.1|/6.58836e-156/PREDICTED: LOW QUALITY PROTEIN: uncharacterized protein LOC100613826 [Pan troglodytes]
441307	3506	0.5675	1.2175	1.10123	Up	0.99634	HRAT92	1	K17985|1|2e-08|53.5|hsa:55626|activating molecule in BECN1-regulated autophagy protein 1;K04006|3|3e-08|63.9|rro:104664183|decay accelerating factor;K14404|4|1e-07|53.5|cjc:103793372|cleavage and polyadenylation specificity factor subunit 4	-	-	-	gi|635140588|ref|XP_008017162.1|/6.12732e-60/PREDICTED: collagen alpha-1(III) chain-like [Chlorocebus sabaeus]
9411	9014.49	1.5325	3.29	1.1022	Up	0.999389	ARHGAP29	1	K20315|1|8e-24|117|cel:CELE_C04D8.1|Rho GTPase-activating protein 21/23;K02649|2|1e-23|116|bfo:BRAFLDRAFT_91712|phosphoinositide-3-kinase, regulatory subunit;K10360|4|3e-23|115|tru:101061902|myosin IX	GO:0044444//cytoplasmic part;GO:0044444//cytoplasmic part;GO:0044444//cytoplasmic part;GO:0044444//cytoplasmic part;GO:0044444//cytoplasmic part	GO:0043169//cation binding;GO:0043169//cation binding;GO:0043169//cation binding;GO:0043169//cation binding;GO:0043169//cation binding	GO:0009966//regulation of signal transduction;GO:0007265//Ras protein signal transduction;GO:0009966//regulation of signal transduction;GO:0007265//Ras protein signal transduction;GO:0009966//regulation of signal transduction;GO:0007265//Ras protein signal transduction;GO:0009966//regulation of signal transduction;GO:0007265//Ras protein signal transduction;GO:0009966//regulation of signal transd…	gi|134304853|ref|NP_004806.3|/0/rho GTPase-activating protein 29 [Homo sapiens]
57512	6663	0.5925	1.2725	1.10278	Up	0.99914	GPR158	2	K08469|1|0.0|2270|hsa:57512|G protein-coupled receptor 158	GO:0031224//intrinsic component of membrane	GO:0004888//transmembrane signaling receptor activity	-	gi|93204867|ref|NP_065803.2|/0/probable G-protein coupled receptor 158 precursor [Homo sapiens]
5926	5787.27	9.0675	19.475	1.10285	Up	1	ARID4A	3	K19194|1|0.0|1838|hsa:5926|AT-rich interactive domain-containing protein 4A	GO:0043231//intracellular membrane-bounded organelle;GO:0043234//protein complex;GO:0044446;GO:0043231//intracellular membrane-bounded organelle;GO:0043234//protein complex;GO:0044446;GO:0043231//intracellular membrane-bounded organelle;GO:0043234//protein complex;GO:0044446	GO:0005488//binding;GO:0001071//nucleic acid binding transcription factor activity;GO:0005488//binding;GO:0001071//nucleic acid binding transcription factor activity;GO:0005488//binding;GO:0001071//nucleic acid binding transcription factor activity	GO:0006355//regulation of transcription, DNA-templated;GO:0006355//regulation of transcription, DNA-templated;GO:0006355//regulation of transcription, DNA-templated	gi|115334673|ref|NP_075376.2|/0/AT-rich interactive domain-containing protein 4A isoform II [Homo sapiens]
56999	7335	1.7825	3.83	1.10344	Up	0.998699	ADAMTS9	1	K08624|1|0.0|4002|hsa:56999|a disintegrin and metalloproteinase with thrombospondin motifs 9 [EC:3.4.24.-]	GO:0031012//extracellular matrix;GO:0031012//extracellular matrix	GO:0004175//endopeptidase activity;GO:0046914//transition metal ion binding;GO:0004175//endopeptidase activity;GO:0046914//transition metal ion binding	GO:0009057//macromolecule catabolic process;GO:0019538//protein metabolic process;GO:0032501//multicellular organismal process;GO:0009057//macromolecule catabolic process;GO:0019538//protein metabolic process;GO:0032501//multicellular organismal process	gi|33624896|ref|NP_891550.1|/0/A disintegrin and metalloproteinase with thrombospondin motifs 9 isoform 1 preproprotein [Homo sapiens]
414318	843	0.5875	1.2625	1.10362	Up	0.997108	C9orf106	3	-	-	-	-	gi|119608293|gb|EAW87887.1|/3.16764e-127/chromosome 9 open reading frame 106, partial [Homo sapiens]
9961	2913.39	8.485	18.24	1.10412	Up	0.999346	MVP	4	K17266|1|0.0|1662|pps:100975053|major vault protein	GO:0005635//nuclear envelope;GO:0032991//macromolecular complex;GO:0005635//nuclear envelope;GO:0032991//macromolecular complex;GO:0005635//nuclear envelope;GO:0032991//macromolecular complex;GO:0005635//nuclear envelope;GO:0032991//macromolecular complex	GO:0005488//binding;GO:0005488//binding;GO:0005488//binding;GO:0005488//binding	GO:0050658//RNA transport;GO:0042221//response to chemical;GO:0050658//RNA transport;GO:0042221//response to chemical;GO:0050658//RNA transport;GO:0042221//response to chemical;GO:0050658//RNA transport;GO:0042221//response to chemical	gi|645912966|ref|NP_001280134.1|/0/major vault protein isoform 3 [Homo sapiens]
10512	5189	105.422	226.632	1.10417	Up	1	SEMA3C	3	K06840|1|0.0|1554|nle:100602982|semaphorin 3	GO:0044464;GO:0044421	GO:0004871//signal transducer activity;GO:0005102//receptor binding	GO:0048646//anatomical structure formation involved in morphogenesis;GO:0048771//tissue remodeling;GO:0001667//ameboidal-type cell migration;GO:0002376//immune system process;GO:0042221//response to chemical;GO:0007399//nervous system development;GO:0003208//cardiac ventricle morphogenesis;GO:0014706//striated muscle tissue development;GO:0009952//anterior/posterior pattern specification;GO:00606…	gi|426356727|ref|XP_004045708.1|/0/PREDICTED: semaphorin-3C isoform 2 [Gorilla gorilla gorilla]
342908	1868	0.7175	1.5425	1.10422	Up	0.998344	ZNF404	2	K09228|1|0.0|1195|hsa:342908|KRAB domain-containing zinc finger protein	GO:0043231//intracellular membrane-bounded organelle	GO:0046914//transition metal ion binding;GO:0003676//nucleic acid binding	GO:0006351//transcription, DNA-templated	gi|154759253|ref|NP_001028891.2|/0/zinc finger protein 404 [Homo sapiens]
9495	6487	3.8175	8.215	1.10563	Up	0.999198	AKAP5	3	K16522|1|0.0|746|hsa:9495|A-kinase anchor protein 5	GO:0032991//macromolecular complex;GO:0032589//neuron projection membrane;GO:0044430;GO:0030175//filopodium;GO:0045202//synapse;GO:0030425//dendrite;GO:0044444//cytoplasmic part;GO:0044297//cell body	GO:0051018//protein kinase A binding;GO:0005102//receptor binding;GO:0019900//kinase binding;GO:0050839//cell adhesion molecule binding;GO:0008092//cytoskeletal protein binding;GO:0019903//protein phosphatase binding	GO:0010737//protein kinase A signaling;GO:0048609//multicellular organismal reproductive process;GO:0001932//regulation of protein phosphorylation;GO:0009628//response to abiotic stimulus;GO:0042993//positive regulation of transcription factor import into nucleus;GO:0015980//energy derivation by oxidation of organic compounds;GO:0021543//pallium development;GO:0031346//positive regulation of cell…	gi|158187521|ref|NP_004848.3|/0/A-kinase anchor protein 5 [Homo sapiens]
84665	5513.14	0.5525	1.19	1.10692	Up	0.981138	MYPN	3	K19875|1|4e-66|256|acs:100559517|myotilin	GO:0030016//myofibril;GO:0043231//intracellular membrane-bounded organelle;GO:0030016//myofibril;GO:0043231//intracellular membrane-bounded organelle;GO:0030016//myofibril;GO:0043231//intracellular membrane-bounded organelle;GO:0005737//cytoplasm;GO:0043229//intracellular organelle;GO:0030016//myofibril;GO:0043231//intracellular membrane-bounded organelle	GO:0008092//cytoskeletal protein binding;GO:0008092//cytoskeletal protein binding;GO:0008092//cytoskeletal protein binding;GO:0008092//cytoskeletal protein binding	-	gi|372220099|ref|NP_001243197.1|/0/myopalladin isoform b [Homo sapiens]
10896	884	0.6525	1.4075	1.10909	Up	0.994096	OCLM	3	-	-	-	GO:0050953//sensory perception of light stimulus	gi|11693180|ref|NP_071770.1|/8.48884e-17/oculomedin [Homo sapiens]
57561	4300.91	7.12	15.39	1.11204	Up	0.99893	ARRDC3	1	K09364|1|3e-11|74.3|gja:107122555|POU domain transcription factor, class 2	GO:0044424;GO:0044424;GO:0044424;GO:0044424;GO:0044424;GO:0044424	GO:0005488//binding;GO:0005488//binding;GO:0005488//binding;GO:0005488//binding;GO:0005488//binding;GO:0005488//binding	GO:0023052//signaling;GO:0023052//signaling;GO:0023052//signaling;GO:0023052//signaling;GO:0023052//signaling;GO:0023052//signaling	gi|28972730|dbj|BAC65781.1|/0/mKIAA1376 protein [Mus musculus]
104355152	496	0.555	1.2	1.11247	Up	0.963472	LINC01090	1	K09228|1|2e-07|57.0|ptr:469069|KRAB domain-containing zinc finger protein;K09513|2|3e-07|56.2|cjc:100394555|DnaJ homolog subfamily B member 7;K01064|5|1e-06|33.9|mcf:102130297|wingless-type MMTV integration site family, member 9	-	-	-	gi|675782270|ref|XP_008949037.1|/1.10445e-12/PREDICTED: uncharacterized protein LOC100968539 isoform X2 [Pan paniscus]
104266956	657	0.5525	1.195	1.11296	Up	0.991925	LINC01044	1	K12581|1|1e-15|85.1|nle:100584332|CCR4-NOT transcription complex subunit 7/8;K17985|2|3e-15|53.5|hsa:55626|activating molecule in BECN1-regulated autophagy protein 1;K11447|4|4e-15|83.6|ptr:449579|histone demethylase [EC:1.14.11.-];K02927|5|2e-14|51.2|nle:100604619|large subunit ribosomal protein L40e	GO:0005815//microtubule organizing center;GO:0034399//nuclear periphery	GO:0005488//binding	GO:0000122//negative regulation of transcription from RNA polymerase II promoter;GO:0007599//hemostasis;GO:0016055//Wnt signaling pathway;GO:0007405//neuroblast proliferation;GO:0016477//cell migration	gi|545688824|ref|NP_001270724.1|/2.98145e-24/uncharacterized protein LOC101865568 precursor [Macaca fascicularis]
387496	960.98	0.8575	1.8575	1.11515	Up	0.978724	RASL11A	1	K07852|1|5e-102|372|nle:100586840|Ras-like protein family member 11A	GO:0031981//nuclear lumen;GO:0031981//nuclear lumen	GO:0017111//nucleoside-triphosphatase activity;GO:0032561//guanyl ribonucleotide binding;GO:0017111//nucleoside-triphosphatase activity;GO:0032561//guanyl ribonucleotide binding	GO:0035556//intracellular signal transduction;GO:0006356//regulation of transcription from RNA polymerase I promoter;GO:0035556//intracellular signal transduction;GO:0006356//regulation of transcription from RNA polymerase I promoter	gi|795393655|ref|XP_011753914.1|/5.60407e-152/PREDICTED: ras-like protein family member 11A [Macaca nemestrina]
1545	5160	36.0375	78.0975	1.11578	Up	1	CYP1B1	3	K07410|1|0.0|1005|hsa:1545|cytochrome P450, family 1, subfamily B, polypeptide 1 [EC:1.14.14.1]	GO:0043231//intracellular membrane-bounded organelle;GO:0031090//organelle membrane	GO:0016712//oxidoreductase activity, acting on paired donors, with incorporation or reduction of molecular oxygen, reduced flavin or flavoprotein as one donor, and incorporation of one atom of oxygen;GO:0005506//iron ion binding	GO:0050953//sensory perception of light stimulus;GO:0019748//secondary metabolic process;GO:0042221//response to chemical;GO:0008202//steroid metabolic process;GO:0044237//cellular metabolic process	gi|189491763|ref|NP_000095.2|/0/cytochrome P450 1B1 [Homo sapiens]
80183	3922.77	0.7825	1.6975	1.11725	Up	0.997348	RUBCNL	1	K19330|1|4e-88|329|ngi:103738522|run domain Beclin-1 interacting and cysteine-rich containing protein	-	-	-	gi|156151402|ref|NP_079389.2|/0/uncharacterized protein KIAA0226-like isoform a [Homo sapiens]
440993	940	1.3575	2.9475	1.11854	Up	0.998935	LINC00969	1	K00234|1|9e-13|76.6|rro:104668708|succinate dehydrogenase (ubiquinone) flavoprotein subunit [EC:1.3.5.1]	-	-	-	gi|675741590|ref|XP_008982368.1|/8.28289e-45/PREDICTED: uncharacterized protein LOC103788931 [Callithrix jacchus]
4327	3226.85	1.5	3.2575	1.1188	Up	0.995395	MMP19	1	K07998|1|0.0|428|hsa:4327|matrix metalloproteinase-19 (RASI) [EC:3.4.24.-]	GO:0031012//extracellular matrix;GO:0031012//extracellular matrix;GO:0031012//extracellular matrix	GO:0004175//endopeptidase activity;GO:0046914//transition metal ion binding;GO:0004175//endopeptidase activity;GO:0046914//transition metal ion binding;GO:0004175//endopeptidase activity;GO:0046914//transition metal ion binding	GO:0048869//cellular developmental process;GO:0022602//ovulation cycle process;GO:0048646//anatomical structure formation involved in morphogenesis;GO:0009719;GO:0019538//protein metabolic process;GO:0032963//collagen metabolic process;GO:0010033//response to organic substance;GO:0048869//cellular developmental process;GO:0022602//ovulation cycle process;GO:0048646//anatomical structure formation…	gi|4505213|ref|NP_002420.1|/0/matrix metalloproteinase-19 isoform 1 preproprotein [Homo sapiens]
6744	5219.17	76.8075	166.882	1.11951	Up	1	SSFA2	1	-	GO:0016020//membrane;GO:0044424;GO:0016020//membrane;GO:0044424;GO:0016020//membrane;GO:0044424;GO:0016020//membrane;GO:0044424;GO:0016020//membrane;GO:0044424;GO:0016020//membrane	GO:0008092//cytoskeletal protein binding;GO:0008092//cytoskeletal protein binding;GO:0008092//cytoskeletal protein binding;GO:0008092//cytoskeletal protein binding;GO:0008092//cytoskeletal protein binding	-	gi|194363771|ref|NP_001123917.1|/0/sperm-specific antigen 2 isoform 1 [Homo sapiens]
29990	1438	4.18	9.0825	1.11959	Up	0.99894	PILRB	3	K15411|1|5e-89|330|nle:100588022|paired immunoglobulin-like type 2 receptor alpha	GO:0016021//integral component of membrane	GO:0005488//binding;GO:0004871//signal transducer activity	GO:0007169//transmembrane receptor protein tyrosine kinase signaling pathway	gi|119596962|gb|EAW76556.1|/1.03934e-112/hCG2024112, isoform CRA_g, partial [Homo sapiens]
7846	1930.53	41.225	89.625	1.12038	Up	1	TUBA1A	1	K07374|1|0.0|847|pale:102888100|tubulin alpha	GO:0005874//microtubule;GO:0044444//cytoplasmic part;GO:0005874//microtubule;GO:0044444//cytoplasmic part;GO:0005874//microtubule;GO:0044444//cytoplasmic part	GO:0017111//nucleoside-triphosphatase activity;GO:0032561//guanyl ribonucleotide binding;GO:0046983//protein dimerization activity;GO:0017111//nucleoside-triphosphatase activity;GO:0032561//guanyl ribonucleotide binding;GO:0046983//protein dimerization activity;GO:0017111//nucleoside-triphosphatase activity;GO:0032561//guanyl ribonucleotide binding;GO:0046983//protein dimerization activity	GO:0022402//cell cycle process;GO:0043623//cellular protein complex assembly;GO:0009207;GO:0007017//microtubule-based process;GO:0006458//'de novo' protein folding;GO:0022402//cell cycle process;GO:0043623//cellular protein complex assembly;GO:0009207;GO:0007017//microtubule-based process;GO:0006458//'de novo' protein folding;GO:0022402//cell cycle process;GO:0043623//cellular protein complex ass…	gi|989976244|ref|XP_015448635.1|/0/PREDICTED: tubulin alpha-1C chain [Pteropus alecto]
343505	1611	0.685	1.4925	1.12356	Up	0.995885	NBPF7	2	K16549|1|1e-11|73.9|mdo:100617812|myomegalin	GO:0044424	-	-	gi|114158664|ref|NP_001041445.1|/0/putative neuroblastoma breakpoint family member 7 [Homo sapiens]
347688	1504	0.4825	1.0525	1.12522	Up	0.995883	TUBB8	2	K07375|1|0.0|816|hsa:347688|tubulin beta	GO:0032991//macromolecular complex;GO:0015630//microtubule cytoskeleton	GO:0017111//nucleoside-triphosphatase activity;GO:0032561//guanyl ribonucleotide binding	GO:0043623//cellular protein complex assembly;GO:0009207;GO:0007017//microtubule-based process	gi|42558279|ref|NP_817124.1|/0/tubulin beta-8 chain [Homo sapiens]
154743	3969	2.6825	5.855	1.12609	Up	0.998928	BMT2	2	-	-	-	-	gi|116812632|ref|NP_689769.2|/0/probable methyltransferase BTM2 homolog [Homo sapiens]
83719	1021.94	11.5075	25.1325	1.12698	Up	0.99927	YPEL3	4	K04371|1|1e-07|60.5|asn:102375250|mitogen-activated protein kinase 1/3 [EC:2.7.11.24]	GO:0031981//nuclear lumen	-	-	gi|151553810|gb|AAI49330.1|/8.76779e-79/YPEL3 protein [Bos taurus]
7433	2704.73	1.37	2.9925	1.12718	Up	0.995705	VIPR1	1	K04589|1|0.0|786|pon:100437846|vasoactive intestinal peptide receptor 1	GO:0016021//integral component of membrane;GO:0016021//integral component of membrane;GO:0016021//integral component of membrane;GO:0016021//integral component of membrane	GO:0004930//G-protein coupled receptor activity;GO:0004930//G-protein coupled receptor activity;GO:0004930//G-protein coupled receptor activity;GO:0004930//G-protein coupled receptor activity	GO:0008283//cell proliferation;GO:0002376//immune system process;GO:0003012//muscle system process;GO:0007267//cell-cell signaling;GO:0007186//G-protein coupled receptor signaling pathway;GO:0008283//cell proliferation;GO:0002376//immune system process;GO:0003012//muscle system process;GO:0007267//cell-cell signaling;GO:0007186//G-protein coupled receptor signaling pathway;GO:0008283//cell prolif…	gi|353523869|ref|NP_001238814.1|/0/vasoactive intestinal polypeptide receptor 1 isoform 5 [Homo sapiens]
283404	1075	0.555	1.2125	1.12743	Up	0.993147	LINC00592	1	-	-	-	-	gi|119578643|gb|EAW58239.1|/5.25223e-49/hCG2038107 [Homo sapiens]
26238	1672	0.865	1.89	1.12761	Up	0.997152	LINC01558	1	K12581|1|4e-23|89.4|nle:100584332|CCR4-NOT transcription complex subunit 7/8;K17985|3|1e-19|100|hsa:55626|activating molecule in BECN1-regulated autophagy protein 1;K11447|4|2e-18|64.3|ptr:449579|histone demethylase [EC:1.14.11.-]	-	-	-	gi|119618897|gb|EAW98491.1|/1.2651e-27/hCG2042307 [Homo sapiens]
5317	5384	5.6675	12.3875	1.1281	Up	0.997372	PKP1	3	K10387|1|0.0|1481|hsa:5317|plakophilin 1	GO:0005911//cell-cell junction;GO:0043234//protein complex;GO:0043231//intracellular membrane-bounded organelle	GO:0060089;GO:0032403//protein complex binding;GO:0005198//structural molecule activity	GO:0006915//apoptotic process;GO:0032501//multicellular organismal process;GO:0023052//signaling	gi|53729344|ref|NP_001005337.1|/0/plakophilin-1 isoform 1a [Homo sapiens]
857	2617.11	3.7275	8.1475	1.12815	Up	0.989135	CAV1	1	K06278|1|3e-94|348|rro:104682636|caveolin 1	GO:0032991//macromolecular complex;GO:0031982//vesicle;GO:0012505//endomembrane system;GO:0043231//intracellular membrane-bounded organelle;GO:0016021//integral component of membrane;GO:0044444//cytoplasmic part;GO:0005924//cell-substrate adherens junction;GO:0032991//macromolecular complex;GO:0031982//vesicle;GO:0012505//endomembrane system;GO:0043231//intracellular membrane-bounded organelle;GO…	GO:0032934//sterol binding;GO:0000149//SNARE binding;GO:0008047//enzyme activator activity;GO:0019899//enzyme binding;GO:0032934//sterol binding;GO:0000149//SNARE binding;GO:0008047//enzyme activator activity;GO:0019899//enzyme binding;GO:0032934//sterol binding;GO:0000149//SNARE binding;GO:0008047//enzyme activator activity;GO:0019899//enzyme binding;GO:0032934//sterol binding;GO:0000149//SNARE …	GO:0033483;GO:0045185//maintenance of protein location;GO:0051704;GO:0001935//endothelial cell proliferation;GO:0030177//positive regulation of Wnt signaling pathway;GO:0006639//acylglycerol metabolic process;GO:0042506//tyrosine phosphorylation of Stat5 protein;GO:0019229//regulation of vasoconstriction;GO:0043405//regulation of MAP kinase activity;GO:0048732//gland development;GO:0014706//stria…	gi|62089438|dbj|BAD93163.1|/1.78743e-101/caveolin 1 variant [Homo sapiens]
105369954	549	1.4475	3.165	1.12864	Up	0.998819	KCCAT198	1	K04257|1|3e-16|86.7|tup:102484198|olfactory receptor;K12417|2|4e-12|60.1|hsa:26027|acyl-CoA thioesteraes 11 [EC:3.1.2.-];K09228|4|4e-11|69.7|ngi:103731973|KRAB domain-containing zinc finger protein	-	GO:0046914//transition metal ion binding;GO:0003676//nucleic acid binding;GO:0016891//endoribonuclease activity, producing 5'-phosphomonoesters;GO:0034061//DNA polymerase activity	GO:0006260//DNA replication	gi|5802821|gb|AAD51797.1|AF164614_1/1.65345e-33/Gag-Pro-Pol protein [Homo sapiens]
55063	2330.36	2.1175	4.63	1.12865	Up	0.999061	ZCWPW1	1	K11424|1|4e-09|66.2|ssc:100515039|histone-lysine N-methyltransferase NSD2 [EC:2.1.1.43]	-	GO:0046914//transition metal ion binding;GO:0046914//transition metal ion binding	-	gi|384367998|ref|NP_001244937.1|/0/zinc finger CW-type PWWP domain protein 1 isoform 2 [Homo sapiens]
64780	3618.48	3.215	7.035	1.12973	Up	0.999083	MICAL1	1	K19947|1|0.0|1964|hsa:64780|protein-methionine sulfoxide oxidase MICAL [EC:1.14.13.-]	GO:0043234//protein complex;GO:0043232;GO:0043234//protein complex;GO:0043232;GO:0043234//protein complex;GO:0043232	GO:0046914//transition metal ion binding;GO:0016491//oxidoreductase activity;GO:0019904//protein domain specific binding;GO:0046914//transition metal ion binding;GO:0016491//oxidoreductase activity;GO:0019904//protein domain specific binding;GO:0046914//transition metal ion binding;GO:0016491//oxidoreductase activity;GO:0019904//protein domain specific binding	GO:0008152//metabolic process;GO:0006996//organelle organization;GO:0023052//signaling;GO:0008152//metabolic process;GO:0006996//organelle organization;GO:0023052//signaling;GO:0008152//metabolic process;GO:0006996//organelle organization;GO:0023052//signaling	gi|557636673|ref|NP_001273542.1|/0/protein-methionine sulfoxide oxidase MICAL1 isoform 3 [Homo sapiens]
100506757	1333	0.475	1.04	1.13058	Up	0.996724	LINC00629	1	-	-	-	-	gi|119632163|gb|EAX11758.1|/2.00157e-22/hCG1818089 [Homo sapiens]
80761	1525.59	17.75	38.875	1.13102	Up	0.995443	UPK3B	2	K17630|1|4e-26|122|fpg:101924060|Ras GTPase-activating protein 4;K19520|2|8e-18|94.4|rro:104665946|uroplakin-3a	GO:0031224//intrinsic component of membrane;GO:0031224//intrinsic component of membrane;GO:0031224//intrinsic component of membrane	-	GO:0010467//gene expression;GO:0010467//gene expression;GO:0010467//gene expression	gi|685530254|ref|XP_009201055.1|/1.38772e-168/PREDICTED: uroplakin-3b isoform X3 [Papio anubis]
5734	3432	1.6125	3.5325	1.13139	Up	0.998746	PTGER4	2	K04261|1|0.0|821|hsa:5734|prostaglandin E receptor 4	GO:0031224//intrinsic component of membrane	GO:0004955//prostaglandin receptor activity	GO:0002376//immune system process;GO:0007187//G-protein coupled receptor signaling pathway, coupled to cyclic nucleotide second messenger;GO:0001503//ossification	gi|685545295|ref|XP_009206594.1|/0/PREDICTED: prostaglandin E2 receptor EP4 subtype isoform X1 [Papio anubis]
151011	3622.6	1.995	4.3725	1.13207	Up	0.998566	2010-09-01	3	K16940|1|0.0|795|mcf:101926106|septin 10	GO:0032156//septin cytoskeleton;GO:0032156//septin cytoskeleton;GO:0032156//septin cytoskeleton;GO:0032156//septin cytoskeleton;GO:0032156//septin cytoskeleton;GO:0032156//septin cytoskeleton;GO:0032156//septin cytoskeleton;GO:0032156//septin cytoskeleton;GO:0032156//septin cytoskeleton;GO:0032156//septin cytoskeleton;GO:0032156//septin cytoskeleton;GO:0032156//septin cytoskeleton;GO:0032156//sep…	GO:0032561//guanyl ribonucleotide binding;GO:0032561//guanyl ribonucleotide binding;GO:0032561//guanyl ribonucleotide binding;GO:0032561//guanyl ribonucleotide binding;GO:0032561//guanyl ribonucleotide binding;GO:0032561//guanyl ribonucleotide binding;GO:0032561//guanyl ribonucleotide binding;GO:0032561//guanyl ribonucleotide binding;GO:0032561//guanyl ribonucleotide binding;GO:0032561//guanyl ri…	GO:0009987//cellular process;GO:0009987//cellular process;GO:0009987//cellular process;GO:0009987//cellular process;GO:0009987//cellular process;GO:0009987//cellular process;GO:0009987//cellular process;GO:0009987//cellular process;GO:0009987//cellular process;GO:0009987//cellular process;GO:0009987//cellular process;GO:0009987//cellular process;GO:0009987//cellular process;GO:0009987//cellular p…	gi|119574245|gb|EAW53860.1|/0/septin 10, isoform CRA_c [Homo sapiens]
5507	2594	7.3225	16.05	1.13217	Up	0.999401	PPP1R3C	6	K07189|1|0.0|664|hsa:5507|protein phosphatase 1 regulatory subunit 3A/B/C/D/E	GO:0044444//cytoplasmic part	GO:0005515//protein binding;GO:0004721//phosphoprotein phosphatase activity	GO:0005980//glycogen catabolic process;GO:0005978//glycogen biosynthetic process	gi|4885559|ref|NP_005389.1|/0/protein phosphatase 1 regulatory subunit 3C [Homo sapiens]
7368	4087	3.8175	8.3675	1.13217	Up	0.999345	UGT8	2	K04628|1|0.0|1041|hsa:7368|2-hydroxyacylsphingosine 1-beta-galactosyltransferase [EC:2.4.1.45]	GO:0031224//intrinsic component of membrane;GO:0031224//intrinsic component of membrane;GO:0031224//intrinsic component of membrane;GO:0031224//intrinsic component of membrane;GO:0031224//intrinsic component of membrane	GO:0035250//UDP-galactosyltransferase activity;GO:0035250//UDP-galactosyltransferase activity;GO:0035250//UDP-galactosyltransferase activity;GO:0035250//UDP-galactosyltransferase activity;GO:0035250//UDP-galactosyltransferase activity	GO:0007399//nervous system development;GO:0007399//nervous system development;GO:0007399//nervous system development;GO:0007399//nervous system development;GO:0007399//nervous system development	gi|40254471|ref|NP_003351.2|/0/2-hydroxyacylsphingosine 1-beta-galactosyltransferase precursor [Homo sapiens]
101927056	675.68	0.9875	2.165	1.13251	Up	0.989703	LOC101927056	1	-	-	-	-	-
101929780	3827	1.7275	3.7875	1.13256	Up	0.997409	NBPF25P	1	K16549|1|2e-09|67.8|mdo:100617812|myomegalin	GO:0044424	-	-	gi|767905862|ref|XP_006710935.2|/0/PREDICTED: putative neuroblastoma breakpoint family member 8 isoform X1 [Homo sapiens]
144608	1139	1.215	2.665	1.13318	Up	0.998954	C12orf60	3	-	-	-	-	gi|821033438|ref|XP_003265586.2|/1.13244e-129/PREDICTED: uncharacterized protein C12orf60 homolog [Nomascus leucogenys]
100128770	3061	0.5425	1.19	1.13327	Up	0.997528	LOC100128770	1	K16756|1|6e-06|56.2|mcf:102144768|coiled-coil domain-containing protein 64	-	-	-	gi|74711208|sp|Q6ZRN7.1|YP029_HUMAN/3.38949e-75/RecName: Full=Putative uncharacterized protein FLJ46214
342184	12524	3.9725	8.715	1.13345	Up	0.998932	FMN1	1	K10367|1|0.0|1642|hsa:342184|formin 1	GO:0005856//cytoskeleton;GO:0043231//intracellular membrane-bounded organelle;GO:0070161;GO:0005856//cytoskeleton;GO:0043231//intracellular membrane-bounded organelle;GO:0070161	GO:0008092//cytoskeletal protein binding;GO:0008092//cytoskeletal protein binding	GO:0007010//cytoskeleton organization;GO:0007010//cytoskeleton organization	gi|472235321|ref|NP_001264243.1|/0/formin-1 isoform c [Homo sapiens]
222537	2744	0.735	1.6125	1.13348	Up	0.995953	HS3ST5	3	K08104|1|0.0|667|hsa:222537|[heparan sulfate]-glucosamine 3-sulfotransferase 5 [EC:2.8.2.23]	GO:0031224//intrinsic component of membrane;GO:0043231//intracellular membrane-bounded organelle;GO:0012505//endomembrane system	GO:0030554//adenyl nucleotide binding;GO:0034483//heparan sulfate sulfotransferase activity	GO:0050817//coagulation;GO:0015012//heparan sulfate proteoglycan biosynthetic process;GO:0040012//regulation of locomotion;GO:0006464//cellular protein modification process	gi|45267824|ref|NP_705840.2|/0/heparan sulfate glucosamine 3-O-sulfotransferase 5 [Homo sapiens]
8341	449	0.83	1.8225	1.13474	Up	0.996837	HIST1H2BN	3	K11252|1|5e-45|181|cge:100761268|histone H2B	GO:0043231//intracellular membrane-bounded organelle	GO:0003676//nucleic acid binding	GO:0034728//nucleosome organization	gi|344238174|gb|EGV94277.1|/4.03917e-44/Histone H2B type 1 [Cricetulus griseus]
100422970	86	0.94	2.065	1.13541	Up	0.910668	MIR1273D	1	-	-	-	-	-
341359	3286	3.7725	8.29	1.13585	Up	0.998029	SYT10	3	K19910|1|0.0|937|hsa:341359|synaptotagmin-10	GO:0044459;GO:0008021//synaptic vesicle;GO:0031224//intrinsic component of membrane	GO:0043169//cation binding	GO:0051234//establishment of localization;GO:0050896//response to stimulus	gi|39752671|ref|NP_945343.1|/0/synaptotagmin-10 [Homo sapiens]
2045	6448.52	1.535	3.38	1.13878	Up	0.99752	EPHA7	3	K05108|1|2e-165|585|shr:100924671|EphA7 [EC:2.7.10.1]	GO:0043005//neuron projection;GO:0016021//integral component of membrane;GO:0044297//cell body;GO:0045202//synapse;GO:0043005//neuron projection;GO:0016021//integral component of membrane;GO:0044297//cell body;GO:0045202//synapse;GO:0043005//neuron projection;GO:0016021//integral component of membrane;GO:0044297//cell body;GO:0045202//synapse	GO:0005102//receptor binding;GO:0004714//transmembrane receptor protein tyrosine kinase activity;GO:0032559//adenyl ribonucleotide binding;GO:0005102//receptor binding;GO:0004714//transmembrane receptor protein tyrosine kinase activity;GO:0032559//adenyl ribonucleotide binding;GO:0005102//receptor binding;GO:0004714//transmembrane receptor protein tyrosine kinase activity;GO:0032559//adenyl ribon…	GO:0007411//axon guidance;GO:0043065//positive regulation of apoptotic process;GO:0006796//phosphate-containing compound metabolic process;GO:0007167//enzyme linked receptor protein signaling pathway;GO:0001763//morphogenesis of a branching structure;GO:0006464//cellular protein modification process;GO:0007411//axon guidance;GO:0043065//positive regulation of apoptotic process;GO:0006796//phospha…	gi|62088118|dbj|BAD92506.1|/0/ephrin receptor EphA7 variant [Homo sapiens]
440689	610.29	3.9975	8.825	1.1425	Up	0.992819	HIST2H2BF	1	K11252|1|1e-48|195|pon:100938272|histone H2B	GO:0043231//intracellular membrane-bounded organelle	GO:0003676//nucleic acid binding	GO:0034728//nucleosome organization	gi|426331226|ref|XP_004026583.1|/2.16191e-62/PREDICTED: histone H2B type 2-F-like isoform 2 [Gorilla gorilla gorilla]
145483	3602	1.79	3.9575	1.14463	Up	0.999342	FAM161B	2	K16772|1|7e-64|248|ola:101173765|protein FAM161A	-	-	-	gi|221044382|dbj|BAH13868.1|/0/unnamed protein product [Homo sapiens]
9630	2492	5.875	12.9925	1.14502	Up	0.998943	GNA14	3	K04636|1|0.0|708|hsa:9630|guanine nucleotide-binding protein subunit alpha-14	GO:0031234//extrinsic component of cytoplasmic side of plasma membrane	GO:0017111//nucleoside-triphosphatase activity;GO:0060089;GO:0032403//protein complex binding;GO:0005102//receptor binding;GO:0032561//guanyl ribonucleotide binding	GO:0001775//cell activation;GO:0007200//phospholipase C-activating G-protein coupled receptor signaling pathway;GO:0009207;GO:0007599//hemostasis;GO:0007187//G-protein coupled receptor signaling pathway, coupled to cyclic nucleotide second messenger;GO:0006464//cellular protein modification process	gi|4758444|ref|NP_004288.1|/0/guanine nucleotide-binding protein subunit alpha-14 [Homo sapiens]
80307	6717	1.2225	2.705	1.14579	Up	0.996933	FER1L4	1	K19949|1|0.0|1886|ssc:100524408|otoferlin	GO:0031224//intrinsic component of membrane	-	-	gi|410055055|ref|XP_003953765.1|/0/PREDICTED: LOW QUALITY PROTEIN: fer-1-like protein 4 [Pan troglodytes]
26829	119	1.51	3.3425	1.14638	Up	0.904217	RNU5E-1	2	-	-	-	-	-
182	5988	1.46	3.2325	1.14668	Up	0.996758	JAG1	2	K06052|1|0.0|2675|mcf:102132875|jagged	GO:0016021//integral component of membrane	GO:0046872//metal ion binding;GO:0005102//receptor binding	GO:0016477//cell migration;GO:0044267//cellular protein metabolic process;GO:0060113//inner ear receptor cell differentiation;GO:0048646//anatomical structure formation involved in morphogenesis;GO:0042692//muscle cell differentiation;GO:0009913//epidermal cell differentiation;GO:0008593//regulation of Notch signaling pathway;GO:0045165//cell fate commitment;GO:0045597//positive regulation of cel…	gi|4557679|ref|NP_000205.1|/0/protein jagged-1 precursor [Homo sapiens]
760	1666	67.3075	149.042	1.14688	Up	1	CA2	2	K18245|1|2e-154|548|hsa:760|carbonic anhydrase 2 [EC:4.2.1.1]	GO:0043005//neuron projection;GO:0043231//intracellular membrane-bounded organelle;GO:0044421;GO:0044459;GO:0044444//cytoplasmic part;GO:0043005//neuron projection;GO:0043231//intracellular membrane-bounded organelle;GO:0044421;GO:0044459;GO:0044444//cytoplasmic part	GO:0048037//cofactor binding;GO:0046914//transition metal ion binding;GO:0016836//hydro-lyase activity;GO:0048037//cofactor binding;GO:0046914//transition metal ion binding;GO:0016836//hydro-lyase activity	GO:0032846;GO:0048729//tissue morphogenesis;GO:0044237//cellular metabolic process;GO:0002763//positive regulation of myeloid leukocyte differentiation;GO:0042476//odontogenesis;GO:0048545//response to steroid hormone;GO:0010038//response to metal ion;GO:0009628//response to abiotic stimulus;GO:0015669;GO:0032846;GO:0048729//tissue morphogenesis;GO:0044237//cellular metabolic process;GO:0002763//…	gi|312207882|pdb|3M1K|A/6.10507e-123/Chain A, Carbonic Anhydrase In Complex With Fragment
7062	6995	0.835	1.85	1.14768	Up	0.999184	TCHH	3	K18626|1|4e-56|224|mcc:717358|trichohyalin	-	-	-	gi|966920321|ref|XP_015007841.1|/3.29904e-55/PREDICTED: trichohyalin [Macaca mulatta]
101927770	1947	1.675	3.7125	1.14823	Up	0.999302	LOC101927770	1	K11447|1|5e-18|63.2|ptr:449579|histone demethylase [EC:1.14.11.-];K12581|4|1e-17|76.6|nle:100584332|CCR4-NOT transcription complex subunit 7/8	GO:0034399//nuclear periphery	GO:0005488//binding	GO:0000122//negative regulation of transcription from RNA polymerase II promoter;GO:0007599//hemostasis	gi|119595988|gb|EAW75582.1|/2.41207e-84/hCG1795439 [Homo sapiens]
8991	1676.8	22.285	49.4075	1.14866	Up	0.999454	SELENBP1	1	K17285|1|0.0|985|hsa:8991|selenium-binding protein 1	GO:0044444//cytoplasmic part;GO:0031981//nuclear lumen;GO:0044444//cytoplasmic part;GO:0031981//nuclear lumen	GO:0005488//binding;GO:0005488//binding	GO:0006810//transport;GO:0006810//transport	gi|385137130|ref|NP_001245218.1|/0/selenium-binding protein 1 isoform 3 [Homo sapiens]
55779	9522.14	2.325	5.1575	1.14944	Up	1	CFAP44	3	K18598|1|8e-32|142|pbi:103058234|echinoderm microtubule-associated protein-like 6	-	-	-	gi|767927154|ref|XP_011511286.1|/0/PREDICTED: cilia- and flagella-associated protein 44 isoform X12 [Homo sapiens]
1606	2692.35	4.99	11.0725	1.14987	Up	0.998943	DGKA	2	K00901|1|0.0|1530|mcf:101925692|diacylglycerol kinase (ATP) [EC:2.7.1.107]	GO:0044444//cytoplasmic part;GO:0016020//membrane;GO:0044444//cytoplasmic part;GO:0016020//membrane;GO:0044444//cytoplasmic part;GO:0016020//membrane;GO:0044444//cytoplasmic part;GO:0016020//membrane	GO:0046872//metal ion binding;GO:0008289//lipid binding;GO:0016301//kinase activity;GO:0032559//adenyl ribonucleotide binding;GO:0046872//metal ion binding;GO:0008289//lipid binding;GO:0016301//kinase activity;GO:0032559//adenyl ribonucleotide binding;GO:0046872//metal ion binding;GO:0008289//lipid binding;GO:0016301//kinase activity;GO:0032559//adenyl ribonucleotide binding;GO:0046872//metal ion…	GO:0001775//cell activation;GO:0007186//G-protein coupled receptor signaling pathway;GO:0007599//hemostasis;GO:0001775//cell activation;GO:0007186//G-protein coupled receptor signaling pathway;GO:0007599//hemostasis;GO:0001775//cell activation;GO:0007186//G-protein coupled receptor signaling pathway;GO:0007599//hemostasis;GO:0001775//cell activation;GO:0007186//G-protein coupled receptor signalin…	gi|530399852|ref|XP_005268745.1|/0/PREDICTED: diacylglycerol kinase alpha isoform X2 [Homo sapiens]
57535	7042.57	23.91	53.11	1.15137	Up	0.999179	KIAA1324	1	K12581|1|5e-24|95.1|nle:100584332|CCR4-NOT transcription complex subunit 7/8;K17985|4|5e-23|114|hsa:55626|activating molecule in BECN1-regulated autophagy protein 1	-	-	-	gi|547235656|ref|NP_001271282.1|/0/UPF0577 protein KIAA1324 isoform 5 [Homo sapiens]
55904	6759.94	11.9825	26.6175	1.15145	Up	1	KMT2E	2	K09189|1|0.0|3241|hsa:55904|histone-lysine N-methyltransferase MLL5 [EC:2.1.1.43]	GO:0035097//histone methyltransferase complex;GO:0016604//nuclear body;GO:0035097//histone methyltransferase complex;GO:0016604//nuclear body	GO:0046914//transition metal ion binding;GO:0005515//protein binding;GO:0018024//histone-lysine N-methyltransferase activity;GO:0003712//transcription cofactor activity;GO:0046914//transition metal ion binding;GO:0005515//protein binding;GO:0018024//histone-lysine N-methyltransferase activity;GO:0003712//transcription cofactor activity	GO:0002274;GO:0032526//response to retinoic acid;GO:0006355//regulation of transcription, DNA-templated;GO:0002763//positive regulation of myeloid leukocyte differentiation;GO:0006305;GO:0002444;GO:0022402//cell cycle process;GO:0030522//intracellular receptor signaling pathway;GO:0034968//histone lysine methylation;GO:0002274;GO:0032526//response to retinoic acid;GO:0006355//regulation of transc…	gi|33636768|ref|NP_891847.1|/0/histone-lysine N-methyltransferase 2E [Homo sapiens]
3866	1861	6.9175	15.37	1.15179	Up	0.99903	KRT15	3	K07604|1|0.0|636|hsa:3866|type I keratin, acidic	GO:0043234//protein complex	GO:0005198//structural molecule activity;GO:0005488//binding	GO:0009888//tissue development	gi|24430190|ref|NP_002266.2|/6.22548e-180/keratin, type I cytoskeletal 15 [Homo sapiens]
140545	2018.19	4.8025	10.6775	1.15272	Up	0.999037	RNF32	1	-	GO:0016234//inclusion body;GO:0043231//intracellular membrane-bounded organelle;GO:0016234//inclusion body;GO:0043231//intracellular membrane-bounded organelle;GO:0016234//inclusion body;GO:0043231//intracellular membrane-bounded organelle;GO:0016234//inclusion body;GO:0043231//intracellular membrane-bounded organelle;GO:0016234//inclusion body;GO:0043231//intracellular membrane-bounded organelle…	GO:0046914//transition metal ion binding;GO:0046914//transition metal ion binding;GO:0046914//transition metal ion binding;GO:0046914//transition metal ion binding;GO:0046914//transition metal ion binding;GO:0046914//transition metal ion binding	-	gi|332264888|ref|XP_003281461.1|/0/PREDICTED: RING finger protein 32 isoform X1 [Nomascus leucogenys]
104472714	734	9.9025	22.105	1.15851	Up	1	DISC1-IT1	1	K17985|1|3e-15|84.3|hsa:55626|activating molecule in BECN1-regulated autophagy protein 1;K15289|2|8e-15|82.8|ggo:101143670|solute carrier family 35, member F5;K02927|3|7e-14|79.7|nle:100604619|large subunit ribosomal protein L40e;K15696|4|3e-13|77.4|nle:100581015|RING finger protein 113B;K04613|5|9e-11|69.3|nle:100592151|vomeronasal 2 receptor	-	-	-	gi|355566999|gb|EHH23378.1|/1.49511e-27/hypothetical protein EGK_06836, partial [Macaca mulatta]
643224	2660	1.1475	2.565	1.16046	Up	0.997463	TUBBP5	1	K07375|1|5e-178|627|hsa:347688|tubulin beta	GO:0032991//macromolecular complex;GO:0015630//microtubule cytoskeleton	GO:0017111//nucleoside-triphosphatase activity;GO:0032561//guanyl ribonucleotide binding	GO:0043623//cellular protein complex assembly;GO:0009207;GO:0007017//microtubule-based process	gi|820996422|ref|XP_012364281.1|/0/PREDICTED: tubulin beta-8 chain isoform X8 [Nomascus leucogenys]
399694	4556	0.6725	1.505	1.16216	Up	0.998531	SHC4	3	K17449|1|0.0|1180|hsa:399694|SHC-transforming protein 4	GO:0044459	GO:0005102//receptor binding	GO:0007165//signal transduction	gi|222446609|ref|NP_976224.3|/0/SHC-transforming protein 4 [Homo sapiens]
375190	1193.24	0.6825	1.53	1.16463	Up	0.998675	FAM228B	1	-	-	-	-	gi|426334886|ref|XP_004028967.1|/0/PREDICTED: protein FAM228B [Gorilla gorilla gorilla]
154796	6819.43	1.5075	3.38	1.16487	Up	0.998634	AMOT	1	K16819|1|0.0|1400|hsa:154796|angiomotin	GO:0016023//cytoplasmic, membrane-bounded vesicle;GO:0032432//actin filament bundle;GO:0043296//apical junction complex;GO:0009986//cell surface;GO:0031252//cell leading edge;GO:0031224//intrinsic component of membrane;GO:0016023//cytoplasmic, membrane-bounded vesicle;GO:0032432//actin filament bundle;GO:0043296//apical junction complex;GO:0009986//cell surface;GO:0031252//cell leading edge;GO:00…	GO:0004871//signal transducer activity;GO:0005515//protein binding;GO:0004871//signal transducer activity;GO:0005515//protein binding	GO:0032233//positive regulation of actin filament bundle assembly;GO:0001525//angiogenesis;GO:0042221//response to chemical;GO:0007369//gastrulation;GO:0001667//ameboidal-type cell migration;GO:0043009//chordate embryonic development;GO:0034329//cell junction assembly;GO:0008361//regulation of cell size;GO:0030154//cell differentiation;GO:0010595//positive regulation of endothelial cell migration…	gi|166064029|ref|NP_001106962.1|/0/angiomotin isoform 1 [Homo sapiens]
59084	3850.76	2.485	5.5725	1.16508	Up	0.999283	ENPP5	5	K18398|1|0.0|913|hsa:59084|ectonucleotide pyrophosphatase/phosphodiesterase family member 5 [EC:3.1.-.-]	GO:0031224//intrinsic component of membrane	GO:0003824//catalytic activity	GO:0009987//cellular process	gi|11034849|ref|NP_067547.1|/0/ectonucleotide pyrophosphatase/phosphodiesterase family member 5 isoform 1 precursor [Homo sapiens]
2914	7261.3	0.5825	1.3075	1.16648	Up	0.998694	GRM4	3	K04607|1|0.0|1775|pps:100978855|metabotropic glutamate receptor 4	GO:0031982//vesicle;GO:0016021//integral component of membrane;GO:0031982//vesicle;GO:0016021//integral component of membrane;GO:0031982//vesicle;GO:0016021//integral component of membrane;GO:0031982//vesicle;GO:0016021//integral component of membrane;GO:0031982//vesicle;GO:0016021//integral component of membrane	GO:0004888//transmembrane signaling receptor activity;GO:0004888//transmembrane signaling receptor activity;GO:0004888//transmembrane signaling receptor activity;GO:0004888//transmembrane signaling receptor activity;GO:0004888//transmembrane signaling receptor activity	GO:0007193//adenylate cyclase-inhibiting G-protein coupled receptor signaling pathway;GO:0007611//learning or memory;GO:0043523//regulation of neuron apoptotic process;GO:0001505//regulation of neurotransmitter levels;GO:0000165//MAPK cascade;GO:0007193//adenylate cyclase-inhibiting G-protein coupled receptor signaling pathway;GO:0007611//learning or memory;GO:0043523//regulation of neuron apopto…	gi|378548209|ref|NP_001243738.1|/0/metabotropic glutamate receptor 4 isoform 2 [Homo sapiens]
27010	2407.05	2.5075	5.63	1.16689	Up	0.999975	TPK1	1	K00949|1|3e-112|408|ptr:463818|thiamine pyrophosphokinase [EC:2.7.6.2]	GO:0044444//cytoplasmic part;GO:0044444//cytoplasmic part	GO:0016778;GO:0032559//adenyl ribonucleotide binding;GO:0016778;GO:0032559//adenyl ribonucleotide binding	GO:0042723//thiamine-containing compound metabolic process;GO:0009108//coenzyme biosynthetic process;GO:0042723//thiamine-containing compound metabolic process;GO:0009108//coenzyme biosynthetic process	gi|817357047|ref|XP_012302990.1|/1.77708e-140/PREDICTED: thiamin pyrophosphokinase 1 [Aotus nancymaae]
56967	7667.49	5.705	12.825	1.16866	Up	0.999063	C14orf132	1	K14404|1|4e-12|78.2|cjc:103793372|cleavage and polyadenylation specificity factor subunit 4;K01064|2|7e-12|65.9|mcc:716877|wingless-type MMTV integration site family, member 9	GO:0031224//intrinsic component of membrane;GO:0031224//intrinsic component of membrane;GO:0031224//intrinsic component of membrane;GO:0031224//intrinsic component of membrane	-	-	gi|119602033|gb|EAW81627.1|/1.2913e-92/hCG1785399, isoform CRA_a [Homo sapiens]
401138	1023	2.47	5.5675	1.17252	Up	0.997255	AMTN	3	-	GO:0005604//basement membrane;GO:0030054//cell junction;GO:0005604//basement membrane;GO:0030054//cell junction	-	GO:0009987//cellular process;GO:0009888//tissue development;GO:0042476//odontogenesis;GO:0009987//cellular process;GO:0009888//tissue development;GO:0042476//odontogenesis	gi|557878593|ref|NP_001273660.1|/1.93208e-114/amelotin isoform 2 precursor [Homo sapiens]
401149	4818	0.56	1.265	1.17564	Up	0.99583	LINC01061	1	-	-	-	-	gi|694892096|ref|XP_009439879.1|/3.23518e-139/PREDICTED: basic proline-rich protein-like, partial [Pan troglodytes]
400793	3868.98	5.4725	12.37	1.17657	Up	0.998999	C1orf226	1	K16513|1|1e-129|467|ptr:457463|carboxyl-terminal PDZ ligand of neuronal nitric oxide synthase protein	-	-	-	gi|207028635|ref|NP_001128712.1|/1.16249e-153/uncharacterized protein C1orf226 isoform 1 [Homo sapiens]
100874042	609	0.58	1.3125	1.17819	Up	0.997208	HM13-AS1	2	-	-	-	-	-
6549	5619	12.105	27.4075	1.17897	Up	0.999053	SLC9A2	5	K14722|1|0.0|1385|ggo:101140092|solute carrier family 9 (sodium/hydrogen exchanger), member 2	GO:0031224//intrinsic component of membrane	GO:0005451//monovalent cation:proton antiporter activity	GO:0055067;GO:0033036;GO:0030001//metal ion transport	gi|635078963|ref|XP_008006459.1|/0/PREDICTED: sodium/hydrogen exchanger 2 [Chlorocebus sabaeus]
285382	5901	0.615	1.395	1.18161	Up	0.998946	C3orf70	1	K17985|1|1e-21|81.3|hsa:55626|activating molecule in BECN1-regulated autophagy protein 1	-	-	-	gi|441633661|ref|XP_003256323.2|/1.34161e-118/PREDICTED: UPF0524 protein C3orf70 homolog [Nomascus leucogenys]
101928103	2240	1.71	3.88	1.18206	Up	0.998928	LOC101928103	1	K04534|1|2e-27|77.8|lcm:102363494|guanine nucleotide-binding protein G(o) subunit alpha;K12298|4|2e-08|63.9|lcm:102351701|bile salt-stimulated lipase [EC:3.1.1.3 3.1.1.13];K11650|5|2e-08|63.9|xtr:100495941|SWI/SNF-related matrix-associated actin-dependent regulator of chromatin subfamily D	-	-	-	gi|148645276|gb|ABR01162.1|/1.57336e-81/endonuclease/reverse transcriptase [Sus scrofa]
54852	5190	0.575	1.305	1.18242	Up	0.999082	PAQR5	3	K17387|1|2e-60|237|gfr:102034408|kinesin family member 23;K07297|3|2e-16|92.0|aqu:100634009|adiponectin receptor	GO:0031224//intrinsic component of membrane;GO:0031224//intrinsic component of membrane	GO:0004871//signal transducer activity;GO:0008289//lipid binding;GO:0004871//signal transducer activity;GO:0008289//lipid binding	GO:0007292//female gamete generation;GO:0048869//cellular developmental process;GO:0007292//female gamete generation;GO:0048869//cellular developmental process	gi|157389021|ref|NP_001098024.1|/0/membrane progestin receptor gamma [Homo sapiens]
7379	947	4.2025	9.5475	1.18388	Up	0.998727	UPK2	3	K19520|1|6e-07|57.4|amj:102573966|uroplakin-3a	GO:0044459;GO:0031227//intrinsic component of endoplasmic reticulum membrane;GO:0016021//integral component of membrane	-	GO:0030154//cell differentiation;GO:0032501//multicellular organismal process	gi|5803215|ref|NP_006751.1|/1.23767e-80/uroplakin-2 precursor [Homo sapiens]
283131	3967.45	33.085	75.1675	1.18393	Up	0.999989	NEAT1	1	K12581|1|7e-17|95.5|nle:100584332|CCR4-NOT transcription complex subunit 7/8;K01064|4|2e-16|94.0|mcf:102130297|wingless-type MMTV integration site family, member 9	-	-	-	gi|119594793|gb|EAW74387.1|/1.75822e-36/hCG2018832, partial [Homo sapiens]
79669	2282.49	1.8025	4.1	1.18562	Up	0.998941	C3orf52	2	-	GO:0031224//intrinsic component of membrane;GO:0031090//organelle membrane;GO:0043231//intracellular membrane-bounded organelle;GO:0031224//intrinsic component of membrane;GO:0031090//organelle membrane;GO:0043231//intracellular membrane-bounded organelle	-	-	gi|284519718|ref|NP_001165218.1|/7.40008e-129/TPA-induced transmembrane protein isoform 1 [Homo sapiens]
7568	3077	1.305	2.97	1.18641	Up	0.997168	ZNF20	3	K09228|1|0.0|1258|pps:103785278|KRAB domain-containing zinc finger protein	GO:0043231//intracellular membrane-bounded organelle;GO:0043231//intracellular membrane-bounded organelle	GO:0046914//transition metal ion binding;GO:0003676//nucleic acid binding;GO:0046914//transition metal ion binding;GO:0003676//nucleic acid binding	GO:0006351//transcription, DNA-templated;GO:0006351//transcription, DNA-templated	gi|931604910|ref|XP_014197995.1|/0/PREDICTED: zinc finger protein 20 isoform X2 [Pan paniscus]
101928567	950	0.84	1.9125	1.187	Up	0.998558	LOC101928567	1	K09228|1|7e-10|67.0|rro:104669310|KRAB domain-containing zinc finger protein;K09513|5|9e-08|60.1|cjc:100394555|DnaJ homolog subfamily B member 7	-	-	-	gi|119576136|gb|EAW55732.1|/1.49102e-33/hCG2040688, partial [Homo sapiens]
6277	683	38.5125	87.785	1.18865	Up	1	S100A6	3	-	GO:0043231//intracellular membrane-bounded organelle;GO:0009898//cytoplasmic side of plasma membrane;GO:0031252//cell leading edge;GO:0044444//cytoplasmic part;GO:0012505//endomembrane system	GO:0008092//cytoskeletal protein binding;GO:0046914//transition metal ion binding;GO:0022891//substrate-specific transmembrane transporter activity;GO:0042802//identical protein binding	GO:0048667//cell morphogenesis involved in neuron differentiation;GO:0006811//ion transport;GO:0023052//signaling;GO:0008284//positive regulation of cell proliferation	gi|7657532|ref|NP_055439.1|/7.75012e-34/protein S100-A6 [Homo sapiens]
55786	2457.36	1.42	3.24	1.1901	Up	1	ZNF415	1	K09228|1|0.0|1103|hsa:55786|KRAB domain-containing zinc finger protein	GO:0005856//cytoskeleton;GO:0031981//nuclear lumen;GO:0005856//cytoskeleton;GO:0031981//nuclear lumen;GO:0005856//cytoskeleton;GO:0031981//nuclear lumen;GO:0005856//cytoskeleton;GO:0031981//nuclear lumen	GO:0046872//metal ion binding;GO:0046872//metal ion binding;GO:0046872//metal ion binding;GO:0046872//metal ion binding	-	gi|768009912|ref|XP_011525400.1|/0/PREDICTED: zinc finger protein 415 isoform X3 [Homo sapiens]
8928	2193	3.265	7.46	1.19209	Up	0.998343	FOXH1	2	K09400|1|0.0|739|pps:100989606|forkhead box protein H	GO:0005667//transcription factor complex	GO:0000981//RNA polymerase II transcription factor activity, sequence-specific DNA binding;GO:0043565//sequence-specific DNA binding;GO:0043566//structure-specific DNA binding;GO:0046332//SMAD binding	GO:0000122//negative regulation of transcription from RNA polymerase II promoter;GO:0007178//transmembrane receptor protein serine/threonine kinase signaling pathway;GO:0009952//anterior/posterior pattern specification;GO:0001667//ameboidal-type cell migration;GO:0001944//vasculature development;GO:0007498//mesoderm development;GO:0007418//ventral midline development;GO:0009855//determination of …	gi|397497323|ref|XP_003819462.1|/0/PREDICTED: forkhead box protein H1 [Pan paniscus]
104548972	1021	0.63	1.44	1.19265	Up	0.992922	SALRNA3	1	-	-	-	-	gi|197692621|dbj|BAG70274.1|/2.52582e-13/hypothetical protein [Homo sapiens]
440508	1935	0.76	1.74	1.19502	Up	0.997383	CLEC4GP1	2	K10061|1|1e-89|306|pps:100978086|C-type lectin superfamily 4 member G	-	GO:0005488//binding	-	gi|119589385|gb|EAW68979.1|/7.87018e-109/hCG2038374, isoform CRA_b, partial [Homo sapiens]
284390	2639	0.4475	1.025	1.19566	Up	0.998922	ZNF763	1	K09228|1|0.0|682|pon:100460710|KRAB domain-containing zinc finger protein	-	GO:0005488//binding	-	gi|686757347|ref|XP_009251090.1|/0/PREDICTED: LOW QUALITY PROTEIN: zinc finger protein 69-like [Pongo abelii]
3128	1235	0.7275	1.6725	1.20099	Up	0.999288	HLA-DRB6	1	K06752|1|2e-89|232|hsa:3125|major histocompatibility complex, class II	GO:0005764//lysosome;GO:0016021//integral component of membrane;GO:0042611;GO:0005770//late endosome;GO:0031090//organelle membrane	GO:0004888//transmembrane signaling receptor activity	GO:0019221//cytokine-mediated signaling pathway;GO:0050851//antigen receptor-mediated signaling pathway;GO:0019882//antigen processing and presentation;GO:0031294//lymphocyte costimulation	gi|345498549|emb|CBX53620.1|/2.41084e-89/MHC class II antigen [Macaca fascicularis]
389834	8205	1.2675	2.9175	1.20275	Up	0.998979	LOC389834	1	K17985|1|5e-18|54.7|hsa:55626|activating molecule in BECN1-regulated autophagy protein 1;K12581|5|5e-17|94.4|nle:100584332|CCR4-NOT transcription complex subunit 7/8	-	-	-	gi|686730863|ref|XP_009242934.1|/1.78719e-148/PREDICTED: LOW QUALITY PROTEIN: ankyrin repeat domain-containing protein SOWAHC-like [Pongo abelii]
79674	2185.08	1.1575	2.6675	1.20448	Up	0.9975	VEPH1	2	K09566|1|1e-44|185|pxy:105383147|peptidyl-prolyl isomerase G (cyclophilin G) [EC:5.2.1.8]	GO:0016020//membrane;GO:0016020//membrane;GO:0016020//membrane;GO:0016020//membrane;GO:0016020//membrane	-	-	gi|269847616|ref|NP_001161387.1|/1.89386e-103/ventricular zone-expressed PH domain-containing protein homolog 1 isoform 3 [Homo sapiens]
90990	3288	10.0825	23.2775	1.20708	Up	0.999148	KIFC2	3	K10406|1|0.0|1197|hsa:90990|kinesin family member C2/C3	GO:0005856//cytoskeleton	GO:0000166//nucleotide binding	-	gi|21955174|ref|NP_665697.1|/0/kinesin-like protein KIFC2 [Homo sapiens]
90293	3176.38	1.795	4.1475	1.20826	Up	1	KLHL13	1	K10447|1|0.0|1210|mcc:710546|kelch-like protein 9/13	GO:0031461//cullin-RING ubiquitin ligase complex;GO:0031461//cullin-RING ubiquitin ligase complex;GO:0031461//cullin-RING ubiquitin ligase complex;GO:0031461//cullin-RING ubiquitin ligase complex	GO:0019787//ubiquitin-like protein transferase activity;GO:0019787//ubiquitin-like protein transferase activity;GO:0019787//ubiquitin-like protein transferase activity;GO:0019787//ubiquitin-like protein transferase activity	GO:0032446//protein modification by small protein conjugation;GO:0000087//mitotic M phase;GO:0032446//protein modification by small protein conjugation;GO:0000087//mitotic M phase;GO:0032446//protein modification by small protein conjugation;GO:0000087//mitotic M phase;GO:0032446//protein modification by small protein conjugation;GO:0000087//mitotic M phase	gi|940712546|ref|XP_014314629.1|/0/PREDICTED: kelch-like protein 13 isoform X1 [Myotis lucifugus]
57121	2815.16	0.615	1.4225	1.20977	Up	0.996704	LPAR5	1	K08390|1|2e-167|592|hsa:57121|lysophosphatidic acid receptor 5	GO:0031224//intrinsic component of membrane;GO:0031224//intrinsic component of membrane	GO:0001608;GO:0001608	-	gi|194380446|dbj|BAG63990.1|/0/unnamed protein product [Homo sapiens]
101927136	3531	0.495	1.145	1.20985	Up	0.998947	LOC101927136	1	-	-	-	-	gi|119629143|gb|EAX08738.1|/7.14828e-16/hCG1741841 [Homo sapiens]
100128573	525	0.98	2.2675	1.21025	Up	0.990054	LOC100128573	1	K17985|1|6e-10|57.8|hsa:55626|activating molecule in BECN1-regulated autophagy protein 1;K01064|3|6e-10|65.5|mcf:102130297|wingless-type MMTV integration site family, member 9;K11447|5|3e-09|63.2|ptr:449579|histone demethylase [EC:1.14.11.-]	GO:0034399//nuclear periphery	GO:0005488//binding	GO:0000122//negative regulation of transcription from RNA polymerase II promoter;GO:0007599//hemostasis	gi|545688824|ref|NP_001270724.1|/4.78056e-13/uncharacterized protein LOC101865568 precursor [Macaca fascicularis]
145694	1821.29	0.795	1.8425	1.21264	Up	0.998776	LOC145694	1	-	GO:0031224//intrinsic component of membrane	GO:0004871//signal transducer activity;GO:0008289//lipid binding	GO:0007292//female gamete generation;GO:0048869//cellular developmental process	gi|119598246|gb|EAW77840.1|/1.91905e-45/hCG2045338 [Homo sapiens]
10924	1972.84	8.7175	20.21	1.21308	Up	1	SMPDL3A	4	K01128|1|0.0|906|hsa:10924|sphingomyelin phosphodiesterase acid-like 3 [EC:3.1.4.-]	GO:0044421;GO:0044421	GO:0005488//binding;GO:0004620//phospholipase activity;GO:0005488//binding;GO:0004620//phospholipase activity	GO:0006684//sphingomyelin metabolic process;GO:0006684//sphingomyelin metabolic process	gi|530383315|ref|XP_005266854.1|/0/PREDICTED: acid sphingomyelinase-like phosphodiesterase 3a isoform X1 [Homo sapiens]
50640	4650.29	6.745	15.64	1.21335	Up	1	PNPLA8	4	K16815|1|0.0|1566|hsa:50640|calcium-independent phospholipase A2-gamma	GO:0031224//intrinsic component of membrane;GO:0031090//organelle membrane;GO:0012505//endomembrane system;GO:0044439;GO:0031224//intrinsic component of membrane;GO:0031090//organelle membrane;GO:0012505//endomembrane system;GO:0044439;GO:0031224//intrinsic component of membrane;GO:0031090//organelle membrane;GO:0012505//endomembrane system;GO:0044439;GO:0031224//intrinsic component of membrane;G…	GO:0004623//phospholipase A2 activity;GO:0032559//adenyl ribonucleotide binding;GO:0004623//phospholipase A2 activity;GO:0032559//adenyl ribonucleotide binding;GO:0004623//phospholipase A2 activity;GO:0032559//adenyl ribonucleotide binding;GO:0004623//phospholipase A2 activity;GO:0032559//adenyl ribonucleotide binding	GO:0006629//lipid metabolic process;GO:0032787//monocarboxylic acid metabolic process;GO:0006629//lipid metabolic process;GO:0032787//monocarboxylic acid metabolic process;GO:0006629//lipid metabolic process;GO:0032787//monocarboxylic acid metabolic process;GO:0006629//lipid metabolic process;GO:0032787//monocarboxylic acid metabolic process	gi|48525351|ref|NP_056538.1|/0/calcium-independent phospholipase A2-gamma isoform 1 [Homo sapiens]
652965	135	0.6475	1.5025	1.21441	Up	0.940737	SNORA48	1	-	-	-	-	-
100131096	3189	1.5675	3.645	1.21745	Up	0.999093	TNRC6C-AS1	1	K11447|1|4e-23|113|ptr:449579|histone demethylase [EC:1.14.11.-];K17985|5|9e-23|70.1|hsa:55626|activating molecule in BECN1-regulated autophagy protein 1	-	-	-	gi|37547457|gb|AAM98767.1|/7.9536e-59/unknown [Homo sapiens]
256302	4787	1.0675	2.485	1.21901	Up	0.999269	NATD1	2	K06975|1|6e-60|236|pon:100457166|uncharacterized protein	-	-	-	gi|116325985|ref|NP_690878.2|/5.60502e-59/protein NATD1 [Homo sapiens]
25800	3633.41	177.007	412.092	1.21916	Up	1	SLC39A6	1	K14712|1|0.0|1151|hsa:25800|solute carrier family 39 (zinc transporter), member 6	GO:0030027//lamellipodium;GO:0043231//intracellular membrane-bounded organelle;GO:0031224//intrinsic component of membrane;GO:0030027//lamellipodium;GO:0043231//intracellular membrane-bounded organelle;GO:0031224//intrinsic component of membrane	GO:0046915//transition metal ion transmembrane transporter activity;GO:0046915//transition metal ion transmembrane transporter activity	GO:0006829//zinc II ion transport;GO:0006829//zinc II ion transport	gi|292495066|sp|Q13433.3|S39A6_HUMAN/0/RecName: Full=Zinc transporter ZIP6; AltName: Full=Estrogen-regulated protein LIV-1; AltName: Full=Solute carrier family 39 member 6; AltName: Full=Zrt- and Irt-like protein 6; Short=ZIP-6; Flags: Precursor
255031	1329.34	1.005	2.34	1.21931	Up	0.997511	LINC00957	1	K17630|1|6e-17|89.4|ggo:101131251|Ras GTPase-activating protein 4	GO:0044444//cytoplasmic part;GO:0016020//membrane;GO:0044444//cytoplasmic part;GO:0016020//membrane;GO:0044444//cytoplasmic part;GO:0016020//membrane	GO:0008047//enzyme activator activity;GO:0043169//cation binding;GO:0008047//enzyme activator activity;GO:0043169//cation binding;GO:0008047//enzyme activator activity;GO:0043169//cation binding	GO:0009966//regulation of signal transduction;GO:0009966//regulation of signal transduction;GO:0009966//regulation of signal transduction	gi|694987876|ref|XP_009438460.1|/1.51847e-39/PREDICTED: ras GTPase-activating protein 4-like [Pan troglodytes]
5413	2104.85	4.7275	11.01	1.21967	Up	0.998949	2005-09-01	5	K04557|1|0.0|698|ptr:458652|septin 5	GO:0032155;GO:0030136//clathrin-coated vesicle;GO:0033267;GO:0032156//septin cytoskeleton;GO:0032432//actin filament bundle;GO:0016020//membrane;GO:0032156//septin cytoskeleton;GO:0016020//membrane;GO:0032432//actin filament bundle;GO:0032155;GO:0033267;GO:0030136//clathrin-coated vesicle	GO:0000149//SNARE binding;GO:0005543//phospholipid binding;GO:0042802//identical protein binding;GO:0032561//guanyl ribonucleotide binding;GO:0032561//guanyl ribonucleotide binding;GO:0017111//nucleoside-triphosphatase activity;GO:0000149//SNARE binding;GO:0005543//phospholipid binding;GO:0042802//identical protein binding	GO:0017157//regulation of exocytosis;GO:0017157//regulation of exocytosis;GO:0009207;GO:0006903//vesicle targeting	gi|724961000|ref|XP_010354673.1|/0/PREDICTED: septin-5 isoform X2 [Rhinopithecus roxellana]
653604	457	0.5775	1.345	1.21971	Up	0.964632	HIST2H3D	2	K11253|1|9e-66|250|tup:102471222|histone H3	GO:0000785//chromatin;GO:0043231//intracellular membrane-bounded organelle	GO:0003676//nucleic acid binding	GO:0034728//nucleosome organization	gi|831277892|ref|XP_012669845.1|/1.28062e-66/PREDICTED: uncharacterized protein LOC105888650 [Clupea harengus]
54979	785	0.445	1.0375	1.22123	Up	0.990972	HRASLS2	1	K16817|1|2e-57|224|pps:100977096|HRAS-like suppressor 3 [EC:3.1.1.32 3.1.1.4]	-	-	-	gi|8923526|ref|NP_060348.1|/3.01944e-57/HRAS-like suppressor 2 [Homo sapiens]
6695	4841	1.15	2.6825	1.22194	Up	0.992042	SPOCK1	3	K08136|1|0.0|858|hsa:6695|sparc/osteonectin, cwcv and kazal-like domains proteoglycan (testican)	GO:0031012//extracellular matrix	GO:0046872//metal ion binding	GO:0048731//system development;GO:0023052//signaling;GO:0009987//cellular process	gi|635123883|ref|XP_008012736.1|/0/PREDICTED: testican-1 isoform X2 [Chlorocebus sabaeus]
8347	438	6.59	15.3825	1.22294	Up	0.999314	HIST1H2BC	2	K11252|1|4e-44|178|pale:102897384|histone H2B	GO:0043231//intracellular membrane-bounded organelle	GO:0003676//nucleic acid binding	GO:0034728//nucleosome organization	gi|743725735|ref|XP_010956834.1|/4.06961e-44/PREDICTED: histone H2B type 2-F [Camelus bactrianus]
644192	900.95	1.155	2.7025	1.2264	Up	0.996967	NR2F2-AS1	1	-	-	-	-	gi|119622597|gb|EAX02192.1|/4.2135e-22/hCG2042756, isoform CRA_a [Homo sapiens]
102724105	1331	1.015	2.3775	1.22797	Up	0.998103	ZNF528-AS1	1	-	-	-	-	gi|90075454|dbj|BAE87407.1|/3.49687e-43/unnamed protein product [Macaca fascicularis]
50649	3705.11	1.61	3.775	1.22942	Up	0.998912	ARHGEF4	3	K05769|1|0.0|1441|pps:100988721|Rho guanine nucleotide exchange factor 4	GO:0001726//ruffle;GO:0044444//cytoplasmic part;GO:0016020//membrane;GO:0001726//ruffle;GO:0044444//cytoplasmic part;GO:0016020//membrane	GO:0005089//Rho guanyl-nucleotide exchange factor activity;GO:0005515//protein binding;GO:0005089//Rho guanyl-nucleotide exchange factor activity;GO:0005515//protein binding	GO:0030035//microspike assembly;GO:0007169//transmembrane receptor protein tyrosine kinase signaling pathway;GO:0009966//regulation of signal transduction;GO:0007266//Rho protein signal transduction;GO:0030035//microspike assembly;GO:0007169//transmembrane receptor protein tyrosine kinase signaling pathway;GO:0009966//regulation of signal transduction;GO:0007266//Rho protein signal transduction	gi|767918364|ref|XP_011509576.1|/0/PREDICTED: rho guanine nucleotide exchange factor 4 isoform X2 [Homo sapiens]
389524	3595	3.13	7.35	1.23158	Up	1	GTF2IRD2B	2	K03121|1|1e-139|500|cjc:100394080|transcription initiation factor TFII-I	GO:0043231//intracellular membrane-bounded organelle	GO:0046914//transition metal ion binding;GO:0003676//nucleic acid binding	-	gi|767947765|ref|XP_011514496.1|/0/PREDICTED: general transcription factor II-I repeat domain-containing protein 2B isoform X2 [Homo sapiens]
101928489	1973	0.62	1.4575	1.23316	Up	0.997113	LOC101928489	1	K01064|1|5e-20|76.6|mcc:716877|wingless-type MMTV integration site family, member 9	-	-	-	gi|694919214|ref|XP_009450650.1|/2.04601e-26/PREDICTED: protein GVQW1-like [Pan troglodytes]
151242	1243.76	1.905	4.48	1.23371	Up	0.999172	PPP1R1C	1	K17549|1|2e-21|105|hsa:151242|protein phosphatase 1 regulatory subunit 1C	GO:0044424;GO:0044424;GO:0044424;GO:0044424;GO:0044424	GO:0019212//phosphatase inhibitor activity;GO:0019212//phosphatase inhibitor activity;GO:0019212//phosphatase inhibitor activity;GO:0019212//phosphatase inhibitor activity;GO:0019212//phosphatase inhibitor activity	GO:0023052//signaling;GO:0023052//signaling;GO:0023052//signaling;GO:0023052//signaling;GO:0023052//signaling	gi|505771867|ref|XP_004601263.1|/7.263e-54/PREDICTED: protein phosphatase 1 regulatory subunit 1C [Sorex araneus]
7161	5154	0.485	1.1425	1.23614	Up	0.996058	TP73	2	K10148|1|0.0|1122|hsa:7161|tumor protein p73	GO:0043234//protein complex;GO:0043231//intracellular membrane-bounded organelle;GO:0044444//cytoplasmic part;GO:0044427;GO:0043234//protein complex;GO:0043231//intracellular membrane-bounded organelle;GO:0044444//cytoplasmic part;GO:0044427;GO:0043234//protein complex;GO:0043231//intracellular membrane-bounded organelle;GO:0044444//cytoplasmic part;GO:0044427;GO:0043234//protein complex;GO:00432…	GO:0001071//nucleic acid binding transcription factor activity;GO:0043566//structure-specific DNA binding;GO:0005515//protein binding;GO:0043565//sequence-specific DNA binding;GO:0043169//cation binding;GO:0001071//nucleic acid binding transcription factor activity;GO:0043566//structure-specific DNA binding;GO:0005515//protein binding;GO:0043565//sequence-specific DNA binding;GO:0043169//cation b…	GO:0048468//cell development;GO:0006281//DNA repair;GO:0021543//pallium development;GO:0006952//defense response;GO:0009653//anatomical structure morphogenesis;GO:0007589//body fluid secretion;GO:0009411//response to UV;GO:0008630//intrinsic apoptotic signaling pathway in response to DNA damage;GO:0010212//response to ionizing radiation;GO:0000077//DNA damage checkpoint;GO:0030330//DNA damage res…	gi|323668328|ref|NP_001191120.1|/0/tumor protein p73 isoform g [Homo sapiens]
100616530	409.62	0.5025	1.185	1.23769	Up	0.993387	C8orf37-AS1	1	-	-	-	-	gi|314991025|gb|ADT65088.1|/6.19982e-52/tospeak-8 [Homo sapiens]
9413	2115.89	2.335	5.515	1.23994	Up	0.998928	FAM189A2	3	-	GO:0031224//intrinsic component of membrane;GO:0031224//intrinsic component of membrane	-	-	gi|530391770|ref|XP_005252364.1|/0/PREDICTED: protein FAM189A2 isoform X1 [Homo sapiens]
3606	1161.09	1.2725	3.01	1.2421	Up	0.996659	IL18	3	K05482|1|2e-107|391|pps:100971499|interleukin 18	GO:0044421;GO:0044444//cytoplasmic part;GO:0044421;GO:0044444//cytoplasmic part	GO:0005102//receptor binding;GO:0060089;GO:0005102//receptor binding;GO:0060089	GO:0002460//adaptive immune response based on somatic recombination of immune receptors built from immunoglobulin superfamily domains;GO:0001787//natural killer cell proliferation;GO:0032616//interleukin-13 production;GO:0007155//cell adhesion;GO:0032604;GO:0023052//signaling;GO:0007610//behavior;GO:0007154//cell communication;GO:0032602//chemokine production;GO:0001819//positive regulation of cy…	gi|342349321|ref|NP_001230140.1|/4.8726e-104/interleukin-18 isoform 2 [Homo sapiens]
441123	442	0.8975	2.125	1.24348	Up	0.996645	LINC00266-3	1	K17985|1|1e-06|53.9|hsa:55626|activating molecule in BECN1-regulated autophagy protein 1;K04460|2|2e-06|52.8|pps:103785929|serine/threonine-protein phosphatase 5 [EC:3.1.3.16];K05632|4|4e-06|52.0|hsa:83737|atrophin-1 interacting protein 4 [EC:2.3.2.26]	-	-	-	gi|45710102|gb|AAH32332.1|/1.45754e-17/PCMTD2 protein [Homo sapiens]
94121	3899.88	7.5475	17.8875	1.24488	Up	1	SYTL4	2	K17598|1|0.0|1202|pps:100985840|synaptotagmin-like protein	GO:0030133//transport vesicle;GO:0030136//clathrin-coated vesicle;GO:0044425;GO:0030133//transport vesicle;GO:0030136//clathrin-coated vesicle;GO:0044425;GO:0030133//transport vesicle;GO:0030136//clathrin-coated vesicle;GO:0044425	GO:0046914//transition metal ion binding;GO:0008289//lipid binding;GO:0005515//protein binding;GO:0046914//transition metal ion binding;GO:0008289//lipid binding;GO:0005515//protein binding;GO:0046914//transition metal ion binding;GO:0008289//lipid binding;GO:0005515//protein binding	GO:0016192//vesicle-mediated transport;GO:0050796//regulation of insulin secretion;GO:0015031//protein transport;GO:0016192//vesicle-mediated transport;GO:0050796//regulation of insulin secretion;GO:0015031//protein transport;GO:0016192//vesicle-mediated transport;GO:0050796//regulation of insulin secretion;GO:0015031//protein transport	gi|193804860|ref|NP_542775.2|/0/synaptotagmin-like protein 4 [Homo sapiens]
643904	3067	0.43	1.02	1.24616	Up	0.998821	RNF222	2	K01064|1|2e-20|64.7|mcf:102130297|wingless-type MMTV integration site family, member 9;K15289|5|2e-14|53.9|ggo:101143670|solute carrier family 35, member F5	GO:0031224//intrinsic component of membrane	GO:0046914//transition metal ion binding	-	gi|226442736|ref|NP_001140156.1|/3.07274e-76/RING finger protein 222 [Homo sapiens]
828	2123.71	2.17	5.16	1.24968	Up	0.99683	CAPS	3	K14684|1|1e-08|64.3|asn:102384281|solute carrier family 25 (mitochondrial phosphate transporter), member 23/24/25/41;K12042|2|2e-08|63.9|bfo:BRAFLDRAFT_106363|troponin C, skeletal muscle;K02183|3|2e-08|63.5|cmk:103185350|calmodulin	-	GO:0046872//metal ion binding;GO:0046872//metal ion binding	GO:0007165//signal transduction;GO:0007165//signal transduction	gi|815891217|ref|NP_542157.2|/3.23992e-132/calcyphosin isoform b [Homo sapiens]
22874	7434	4.485	10.665	1.2497	Up	0.999478	PLEKHA6	4	K17536|1|2e-11|75.9|ola:101157335|connector enhancer of kinase suppressor of Ras 2	-	-	-	gi|119611915|gb|EAW91509.1|/0/pleckstrin homology domain containing, family A member 6, isoform CRA_a [Homo sapiens]
114904	2942.21	7.8425	18.7075	1.25423	Up	1	C1QTNF6	1	K19470|1|2e-154|549|hsa:114904|complement C1q tumor necrosis factor-related protein 6	-	-	-	gi|32967294|ref|NP_114116.3|/8.71474e-154/complement C1q tumor necrosis factor-related protein 6 [Homo sapiens]
6505	3757	1.1275	2.69	1.25448	Up	0.998831	SLC1A1	5	K05612|1|0.0|894|hsa:6505|solute carrier family 1 (neuronal/epithelial high affinity glutamate transporter), member 1	GO:0016021//integral component of membrane	GO:0005283//sodium:amino acid symporter activity;GO:0005310//dicarboxylic acid transmembrane transporter activity;GO:0016597//amino acid binding;GO:0005313//L-glutamate transmembrane transporter activity	GO:0007267//cell-cell signaling;GO:0051259//protein oligomerization;GO:0043090//amino acid import;GO:0015813//L-glutamate transport	gi|66773030|ref|NP_004161.4|/0/excitatory amino acid transporter 3 [Homo sapiens]
2550	4443.64	1.6775	4.0025	1.25459	Up	0.998461	GABBR1	2	K04615|1|0.0|1359|phd:102328678|gamma-aminobutyric acid type B receptor	GO:0044297//cell body;GO:0016021//integral component of membrane;GO:0032589//neuron projection membrane;GO:0030425//dendrite;GO:0031090//organelle membrane;GO:0005740//mitochondrial envelope;GO:0030136//clathrin-coated vesicle;GO:0044297//cell body;GO:0016021//integral component of membrane;GO:0032589//neuron projection membrane;GO:0030425//dendrite;GO:0031090//organelle membrane;GO:0005740//mito…	GO:0005515//protein binding;GO:0008066//glutamate receptor activity;GO:0005515//protein binding;GO:0008066//glutamate receptor activity;GO:0005515//protein binding;GO:0008066//glutamate receptor activity;GO:0005515//protein binding;GO:0008066//glutamate receptor activity	GO:0060123//regulation of growth hormone secretion;GO:0031280;GO:0014046;GO:0014060;GO:0008283//cell proliferation;GO:0006171//cAMP biosynthetic process;GO:0014070//response to organic cyclic compound;GO:0007186//G-protein coupled receptor signaling pathway;GO:0050804//modulation of synaptic transmission;GO:0014051//gamma-aminobutyric acid secretion;GO:0060123//regulation of growth hormone secret…	gi|795424948|ref|XP_011947833.1|/0/PREDICTED: gamma-aminobutyric acid type B receptor subunit 1 isoform X1 [Cercocebus atys]
1244	5446	3.145	7.505	1.25479	Up	0.998623	ABCC2	4	K05666|1|0.0|2803|hsa:1244|ATP-binding cassette, subfamily C (CFTR/MRP), member 2	GO:0016021//integral component of membrane;GO:0005911//cell-cell junction	GO:0017111//nucleoside-triphosphatase activity;GO:0008509//anion transmembrane transporter activity;GO:0015405;GO:0032559//adenyl ribonucleotide binding	GO:0006820//anion transport;GO:0009207	gi|4557481|ref|NP_000383.1|/0/canalicular multispecific organic anion transporter 1 [Homo sapiens]
7059	3158.94	3.045	7.2675	1.25502	Up	0.997801	THBS3	4	K04659|1|0.0|1573|pon:100443331|thrombospondin 2/3/4/5	GO:0044444//cytoplasmic part	GO:0046872//metal ion binding;GO:0005539//glycosaminoglycan binding	GO:0003416//endochondral bone growth;GO:0031589//cell-substrate adhesion;GO:0001503//ossification;GO:0060343	gi|675741056|ref|XP_008968459.1|/0/PREDICTED: thrombospondin-3 isoform X2 [Pan paniscus]
101928565	629	0.9425	2.25	1.25536	Up	0.996677	LOC101928565	1	-	GO:0031224//intrinsic component of membrane	-	GO:0006810//transport	gi|119611232|gb|EAW90826.1|/1.48026e-22/hCG1808016 [Homo sapiens]
6483	4450	0.7925	1.8925	1.25581	Up	0.996797	ST3GAL2	3	K03368|1|0.0|742|pon:100457161|beta-galactoside alpha-2,3-sialyltransferase (sialyltransferase 4B) [EC:2.4.99.4]	GO:0031228//intrinsic component of Golgi membrane	GO:0008373//sialyltransferase activity	GO:0005996//monosaccharide metabolic process;GO:0006464//cellular protein modification process	gi|589922499|ref|XP_006974157.1|/0/PREDICTED: CMP-N-acetylneuraminate-beta-galactosamide-alpha-2,3-sialyltransferase 2 isoform X1 [Peromyscus maniculatus bairdii]
22836	5566	111.118	266.725	1.26327	Up	1	RHOBTB3	3	K07869|1|0.0|1243|hsa:22836|Rho-related BTB domain-containing protein 3	GO:0043231//intracellular membrane-bounded organelle	GO:0017111//nucleoside-triphosphatase activity;GO:0032559//adenyl ribonucleotide binding	GO:0009207;GO:0016197//endosomal transport	gi|471369208|ref|XP_004375123.1|/0/PREDICTED: rho-related BTB domain-containing protein 3 [Trichechus manatus latirostris]
23554	2579	2.16	5.185	1.26331	Up	0.999287	TSPAN12	3	K17355|1|3e-173|611|nle:100603513|tetraspanin-12	GO:0016021//integral component of membrane	GO:0004888//transmembrane signaling receptor activity	GO:0003407//neural retina development;GO:0048646//anatomical structure formation involved in morphogenesis;GO:0022603//regulation of anatomical structure morphogenesis;GO:0007165//signal transduction	gi|694923780|ref|XP_009452345.1|/0/PREDICTED: tetraspanin-12 isoform X1 [Pan troglodytes]
4826	1328	0.5025	1.2075	1.26483	Up	0.998576	NNAT	3	-	GO:0044424	-	GO:0008104//protein localization;GO:0009746;GO:0050796//regulation of insulin secretion	gi|426242021|ref|XP_004014877.1|/1.73324e-58/PREDICTED: neuronatin isoform X1 [Ovis aries]
5420	5936.65	21.0775	50.665	1.26529	Up	0.996212	PODXL	2	K06817|1|0.0|902|hsa:5420|podocalyxin-like	GO:0005815//microtubule organizing center;GO:0016021//integral component of membrane;GO:0031981//nuclear lumen;GO:0044459;GO:0031252//cell leading edge;GO:0005902//microvillus;GO:0005815//microtubule organizing center;GO:0016021//integral component of membrane;GO:0031981//nuclear lumen;GO:0044459;GO:0031252//cell leading edge;GO:0005902//microvillus	-	GO:0016477//cell migration;GO:0030033//microvillus assembly;GO:0022409//positive regulation of cell-cell adhesion;GO:0035148//tube formation;GO:0007162//negative regulation of cell adhesion;GO:0002376//immune system process;GO:0016477//cell migration;GO:0030033//microvillus assembly;GO:0022409//positive regulation of cell-cell adhesion;GO:0035148//tube formation;GO:0007162//negative regulation of…	gi|33598950|ref|NP_005388.2|/0/podocalyxin isoform 2 precursor [Homo sapiens]
3007	777	0.65	1.5625	1.26534	Up	0.967894	HIST1H1D	2	K11275|1|8e-26|119|chx:102180549|histone H1/5	GO:0000785//chromatin;GO:0043231//intracellular membrane-bounded organelle	GO:0003676//nucleic acid binding	GO:0034728//nucleosome organization	gi|926722098|ref|XP_013829520.1|/6.62236e-25/PREDICTED: histone H1.3 [Capra hircus]
284379	1252	2.625	6.315	1.26647	Up	0.999078	LOC284379	3	K13865|1|5e-54|144|mcf:102116984|solute carrier family 7 (cationic amino acid transporter), member 3	-	-	-	gi|982316924|ref|XP_005590318.2|/3.94871e-53/PREDICTED: cationic amino acid transporter 3-like [Macaca fascicularis]
100132111	761	0.89	2.145	1.2691	Up	0.99339	LOC100132111	1	-	-	-	-	gi|221039604|dbj|BAH11565.1|/3.40247e-26/unnamed protein product [Homo sapiens]
79933	4717	0.5725	1.38	1.26932	Up	0.997125	SYNPO2L	2	K17985|1|2e-26|90.9|hsa:55626|activating molecule in BECN1-regulated autophagy protein 1;K01064|4|6e-19|82.8|mcf:102130297|wingless-type MMTV integration site family, member 9	GO:0044424	-	-	gi|166706868|ref|NP_001107605.1|/0/synaptopodin 2-like protein isoform a [Homo sapiens]
4889	2370.26	0.5475	1.32	1.26961	Up	0.997395	NPY5R	1	K04207|1|0.0|908|rro:104672203|neuropeptide Y receptor type 5	GO:0016021//integral component of membrane;GO:0044424;GO:0016021//integral component of membrane;GO:0044424;GO:0016021//integral component of membrane;GO:0044424	GO:0004983//neuropeptide Y receptor activity;GO:0004983//neuropeptide Y receptor activity;GO:0004983//neuropeptide Y receptor activity	GO:0014047//glutamate secretion;GO:0002526//acute inflammatory response;GO:0032228//regulation of synaptic transmission, GABAergic;GO:0003208//cardiac ventricle morphogenesis;GO:0022602//ovulation cycle process;GO:0008284//positive regulation of cell proliferation;GO:0007186//G-protein coupled receptor signaling pathway;GO:0007631//feeding behavior;GO:0014047//glutamate secretion;GO:0002526//acut…	gi|1438904|gb|AAC50623.1|/0/Y5 receptor [Homo sapiens]
1291	4246	1.445	3.485	1.27009	Up	0.996645	COL6A1	2	K06238|1|0.0|1683|hsa:1291|collagen, type VI, alpha	GO:0030934;GO:0005886//plasma membrane	GO:0019838//growth factor binding	GO:0006935//chemotaxis;GO:0009987//cellular process	gi|87196339|ref|NP_001839.2|/0/collagen alpha-1(VI) chain precursor [Homo sapiens]
10826	3046	1.135	2.7375	1.27017	Up	0.99715	FAXDC2	4	K07750|1|0.0|712|hsa:10826|methylsterol monooxygenase [EC:1.14.13.72]	GO:0031224//intrinsic component of membrane	GO:0046914//transition metal ion binding;GO:0003824//catalytic activity	GO:0006631//fatty acid metabolic process	gi|119582034|gb|EAW61630.1|/0/chromosome 5 open reading frame 4, isoform CRA_b [Homo sapiens]
90627	6045.75	2.1275	5.1325	1.2705	Up	0.999336	STARD13	2	K08773|1|1e-13|82.4|sko:100377036|RalA-binding protein 1;K10360|2|3e-13|81.6|soc:105194477|myosin IX;K05732|3|3e-13|81.3|tru:101068709|glucocorticoid receptor DNA-binding factor 1	GO:0005740//mitochondrial envelope;GO:0005740//mitochondrial envelope;GO:0005740//mitochondrial envelope;GO:0005740//mitochondrial envelope;GO:0005740//mitochondrial envelope;GO:0005740//mitochondrial envelope	GO:0008047//enzyme activator activity;GO:0005488//binding;GO:0008047//enzyme activator activity;GO:0005488//binding;GO:0008047//enzyme activator activity;GO:0005488//binding;GO:0008047//enzyme activator activity;GO:0005488//binding;GO:0008047//enzyme activator activity;GO:0005488//binding;GO:0008047//enzyme activator activity;GO:0005488//binding	GO:0035556//intracellular signal transduction;GO:0009966//regulation of signal transduction;GO:0035556//intracellular signal transduction;GO:0009966//regulation of signal transduction;GO:0035556//intracellular signal transduction;GO:0009966//regulation of signal transduction;GO:0035556//intracellular signal transduction;GO:0009966//regulation of signal transduction;GO:0035556//intracellular signa…	gi|931584097|ref|XP_014202906.1|/0/PREDICTED: stAR-related lipid transfer protein 13 isoform X4 [Pan paniscus]
100128553	2626	1.095	2.6425	1.27097	Up	0.99715	CTAGE4	2	K11849|1|2e-17|94.4|ecb:100147361|ubiquitin carboxyl-terminal hydrolase 25/28 [EC:3.4.19.12];K11498|2|6e-11|72.4|cin:100184032|centromeric protein E;K20282|3|1e-10|71.6|rno:309798|GRIP and coiled-coil domain-containing protein 2	GO:0031224//intrinsic component of membrane	-	-	gi|193290160|ref|NP_940897.2|/0/cTAGE family member 4 [Homo sapiens]
1836	8082	2.08	5.03	1.27397	Up	0.999207	SLC26A2	3	K14701|1|0.0|1273|hsa:1836|solute carrier family 26 (sulfate anion transporter), member 2	GO:0016021//integral component of membrane	GO:0015291//secondary active transmembrane transporter activity;GO:0015103//inorganic anion transmembrane transporter activity	GO:0015698//inorganic anion transport;GO:0032501//multicellular organismal process	gi|100913030|ref|NP_000103.2|/0/sulfate transporter [Homo sapiens]
150786	3672	0.4325	1.0475	1.27618	Up	0.998102	WTH3DI	1	K07895|1|1e-138|497|hsa:150786|Ras-related protein Rab-6C	GO:0044464	GO:0017111//nucleoside-triphosphatase activity;GO:0032561//guanyl ribonucleotide binding	GO:0006810//transport;GO:0035556//intracellular signal transduction;GO:0009207;GO:0042221//response to chemical	gi|117938299|ref|NP_001071105.1|/1.0086e-137/RAB6C-like [Homo sapiens]
100129583	1627	0.6575	1.5925	1.27623	Up	0.997926	FAM47E	2	K00522|1|3e-10|69.3|ptg:102951417|ferritin heavy chain [EC:1.16.3.2]	-	-	-	gi|339515660|ref|NP_001229865.1|/7.59472e-163/protein FAM47E isoform b [Homo sapiens]
150759	3128	7.9175	19.1975	1.2778	Up	1	LINC00342	1	-	-	-	-	gi|119574295|gb|EAW53910.1|/5.54873e-73/hCG2038665, isoform CRA_b [Homo sapiens]
6414	2240.53	0.535	1.2975	1.27812	Up	0.997774	SEPP1	1	-	GO:0044421;GO:0044421;GO:0044421	GO:0005488//binding;GO:0005488//binding;GO:0005488//binding	GO:0044237//cellular metabolic process;GO:0006950//response to stress;GO:0000003//reproduction;GO:0007417//central nervous system development;GO:0007610//behavior;GO:0044237//cellular metabolic process;GO:0006950//response to stress;GO:0000003//reproduction;GO:0007417//central nervous system development;GO:0007610//behavior;GO:0044237//cellular metabolic process;GO:0006950//response to stress;GO:…	gi|148277022|ref|NP_001087195.1|/0/selenoprotein P isoform 2 [Homo sapiens]
2086	3288	3.985	9.6675	1.27856	Up	1	ERV3-1	3	K10168|1|1e-21|108|gfr:102042378|toll-like receptor 5;K09228|2|4e-12|71.2|rro:104679414|KRAB domain-containing zinc finger protein	GO:0044423	-	-	gi|145651814|ref|NP_001007254.2|/0/endogenous retrovirus group 3 member 1 Env polyprotein precursor [Homo sapiens]
10370	1931.55	29.5225	71.7775	1.28172	Up	0.999724	CITED2	2	-	GO:0000785//chromatin;GO:0043231//intracellular membrane-bounded organelle;GO:0000785//chromatin;GO:0043231//intracellular membrane-bounded organelle;GO:0000785//chromatin;GO:0043231//intracellular membrane-bounded organelle	GO:0003712//transcription cofactor activity;GO:0001071//nucleic acid binding transcription factor activity;GO:0019904//protein domain specific binding;GO:0003712//transcription cofactor activity;GO:0001071//nucleic acid binding transcription factor activity;GO:0019904//protein domain specific binding;GO:0003712//transcription cofactor activity;GO:0001071//nucleic acid binding transcription factor…	GO:0048729//tissue morphogenesis;GO:0007179//transforming growth factor beta receptor signaling pathway;GO:0003006//developmental process involved in reproduction;GO:0001944//vasculature development;GO:0016337//single organismal cell-cell adhesion;GO:0009855//determination of bilateral symmetry;GO:0048545//response to steroid hormone;GO:0048513//animal organ development;GO:0051726//regulation of …	gi|389565479|ref|NP_001161861.2|/1.05768e-112/cbp/p300-interacting transactivator 2 isoform 2 [Homo sapiens]
139818	6638	1.205	2.93	1.28187	Up	0.999119	DOCK11	3	K13708|1|3e-19|101|mde:101891400|dedicator of cytokinesis protein 1;K05727|3|7e-17|93.6|apla:101802963|dedicator of cytokinesis protein 3	GO:0044444//cytoplasmic part	GO:0032561//guanyl ribonucleotide binding;GO:0030695//GTPase regulator activity;GO:0019899//enzyme binding	GO:0007599//hemostasis	gi|145699123|ref|NP_653259.3|/0/dedicator of cytokinesis protein 11 [Homo sapiens]
83872	18212	1.255	3.0575	1.28467	Up	0.997692	HMCN1	2	K17341|1|0.0|1.138e+04|hsa:83872|hemicentin	GO:0044459;GO:0044444//cytoplasmic part;GO:0005578//proteinaceous extracellular matrix	GO:0046872//metal ion binding	GO:0006464//cellular protein modification process;GO:0050953//sensory perception of light stimulus	gi|118572606|ref|NP_114141.2|/0/hemicentin-1 precursor [Homo sapiens]
101927884	1185	1.0475	2.555	1.28637	Up	0.99893	LOC101927884	1	-	-	-	-	gi|119570760|gb|EAW50375.1|/2.94838e-35/hCG1982155, partial [Homo sapiens]
388403	5242	3.315	8.095	1.28802	Up	0.998941	YPEL2	3	K04371|1|2e-06|58.5|asn:102375250|mitogen-activated protein kinase 1/3 [EC:2.7.11.24]	-	-	-	gi|533160359|ref|XP_005394044.1|/1.14977e-93/PREDICTED: protein yippee-like 2 [Chinchilla lanigera]
285966	4869.91	1.635	3.995	1.2889	Up	0.998956	TCAF2	2	K15259|1|2e-50|204|cmy:102945703|poly [ADP-ribose] polymerase 7/11/12/13 [EC:2.4.2.30];K12581|2|1e-09|68.9|nle:100584332|CCR4-NOT transcription complex subunit 7/8;K07560|3|5e-08|55.8|pon:100459622|D-tyrosyl-tRNA(Tyr) deacylase [EC:3.1.-.-];K11447|5|3e-06|57.8|ptr:449579|histone demethylase [EC:1.14.11.-]	-	-	-	gi|194097425|ref|NP_775949.2|/0/protein FAM115C isoform A [Homo sapiens]
728730	2517	2.1975	5.3725	1.28973	Up	0.999431	LOC728730	1	K09228|1|3e-08|63.5|nle:101176279|KRAB domain-containing zinc finger protein;K12642|4|1e-07|61.6|hsa:5318|plakophilin 2	GO:0043231//intracellular membrane-bounded organelle	GO:0046914//transition metal ion binding;GO:0001071//nucleic acid binding transcription factor activity	GO:0006351//transcription, DNA-templated;GO:0006325//chromatin organization	gi|119620750|gb|EAX00345.1|/3.24237e-20/hCG1817877 [Homo sapiens]
677800	147	0.695	1.705	1.29469	Up	0.900597	SNORA12	1	-	-	-	-	-
10057	4731.63	14.4525	35.4775	1.29559	Up	1	ABCC5	1	K05668|1|2e-119|432|mcf:101926071|ATP-binding cassette, subfamily C (CFTR/MRP), member 5	GO:0016021//integral component of membrane;GO:0016021//integral component of membrane;GO:0016021//integral component of membrane;GO:0016021//integral component of membrane	GO:0015405;GO:0017111//nucleoside-triphosphatase activity;GO:0032559//adenyl ribonucleotide binding;GO:0008509//anion transmembrane transporter activity;GO:0015405;GO:0017111//nucleoside-triphosphatase activity;GO:0032559//adenyl ribonucleotide binding;GO:0008509//anion transmembrane transporter activity;GO:0015405;GO:0017111//nucleoside-triphosphatase activity;GO:0032559//adenyl ribonucleotide b…	GO:0006820//anion transport;GO:0006820//anion transport;GO:0006820//anion transport;GO:0006820//anion transport	gi|4140698|gb|AAD04169.1|/0/ABC transporter MOAT-C [Homo sapiens]
492311	2900	0.6375	1.565	1.29567	Up	0.998791	IGIP	1	-	-	-	-	gi|664713685|ref|XP_008513810.1|/3.69365e-31/PREDICTED: IgA-inducing protein homolog [Equus przewalskii]
146880	2881.26	6.35	15.6175	1.29834	Up	1	LOC146880	1	K11728|1|2e-86|323|pale:102893827|nucleosome-remodeling factor subunit BPTF	-	-	-	gi|119614595|gb|EAW94189.1|/1.78451e-110/hCG2002091, isoform CRA_c, partial [Homo sapiens]
2934	2663.01	42.5825	104.735	1.29841	Up	1	GSN	1	K05768|1|0.0|1505|ptr:464706|gelsolin	GO:0005856//cytoskeleton;GO:0044444//cytoplasmic part;GO:0005856//cytoskeleton;GO:0044444//cytoplasmic part;GO:0005856//cytoskeleton;GO:0044444//cytoplasmic part;GO:0005856//cytoskeleton;GO:0044444//cytoplasmic part;GO:0005856//cytoskeleton;GO:0044444//cytoplasmic part;GO:0005856//cytoskeleton;GO:0044444//cytoplasmic part;GO:0005856//cytoskeleton;GO:0044444//cytoplasmic part;GO:0005856//cytoskele…	GO:0008092//cytoskeletal protein binding;GO:0046872//metal ion binding;GO:0008092//cytoskeletal protein binding;GO:0046872//metal ion binding;GO:0008092//cytoskeletal protein binding;GO:0046872//metal ion binding;GO:0008092//cytoskeletal protein binding;GO:0046872//metal ion binding;GO:0008092//cytoskeletal protein binding;GO:0046872//metal ion binding;GO:0008092//cytoskeletal protein binding;GO:…	GO:0048858//cell projection morphogenesis;GO:0006915//apoptotic process;GO:0051693//actin filament capping;GO:0048858//cell projection morphogenesis;GO:0006915//apoptotic process;GO:0051693//actin filament capping;GO:0048858//cell projection morphogenesis;GO:0006915//apoptotic process;GO:0051693//actin filament capping;GO:0048858//cell projection morphogenesis;GO:0006915//apoptotic process;GO:005…	gi|384475528|ref|NP_001244958.1|/0/gelsolin isoform d [Homo sapiens]
643008	2810.1	1.055	2.5975	1.29988	Up	0.993695	SMIM5	1	K12581|1|4e-25|100|nle:100584332|CCR4-NOT transcription complex subunit 7/8;K11447|3|5e-20|68.2|ptr:449579|histone demethylase [EC:1.14.11.-];K17985|5|4e-19|100|hsa:55626|activating molecule in BECN1-regulated autophagy protein 1	-	-	-	gi|694969709|ref|XP_009431574.1|/1.39245e-32/PREDICTED: small integral membrane protein 5 isoform X1 [Pan troglodytes]
7367	2099	0.5025	1.2375	1.30023	Up	0.997199	UGT2B17	3	K00699|1|0.0|1066|hsa:7367|glucuronosyltransferase [EC:2.4.1.17]	GO:0031090//organelle membrane;GO:0043231//intracellular membrane-bounded organelle;GO:0031224//intrinsic component of membrane	GO:0008194//UDP-glycosyltransferase activity;GO:0005501//retinoid binding	GO:0006629//lipid metabolic process;GO:0044237//cellular metabolic process	gi|4507821|ref|NP_001068.1|/0/UDP-glucuronosyltransferase 2B17 precursor [Homo sapiens]
4603	5059.08	9.285	22.92	1.30363	Up	1	MYBL1	1	K09421|1|0.0|1251|hsa:4603|myb-related protein	GO:0031981//nuclear lumen;GO:0031981//nuclear lumen;GO:0031981//nuclear lumen	GO:0003676//nucleic acid binding	GO:0006351//transcription, DNA-templated;GO:0006351//transcription, DNA-templated;GO:0006351//transcription, DNA-templated	gi|221139773|ref|NP_001138227.1|/0/myb-related protein A isoform 2 [Homo sapiens]
5176	1287.88	2.98	7.3575	1.3039	Up	0.998958	SERPINF1	1	K19614|1|0.0|725|hsa:5176|pigment epithelium-derived factor	GO:0048770;GO:0044421;GO:0048770;GO:0044421;GO:0048770;GO:0044421;GO:0048770;GO:0044421	GO:0004866//endopeptidase inhibitor activity;GO:0004866//endopeptidase inhibitor activity;GO:0004866//endopeptidase inhibitor activity;GO:0004866//endopeptidase inhibitor activity	GO:0001525//angiogenesis;GO:0031348//negative regulation of defense response;GO:0007613//memory;GO:0033189//response to vitamin A;GO:0010720//positive regulation of cell development;GO:0048513//animal organ development;GO:0050680//negative regulation of epithelial cell proliferation;GO:0031960//response to corticosteroid;GO:0006508//proteolysis;GO:0010466//negative regulation of peptidase activit…	gi|39725934|ref|NP_002606.3|/0/pigment epithelium-derived factor precursor [Homo sapiens]
388743	2427	0.8925	2.2075	1.30649	Up	0.997329	CAPN8	1	K08577|1|0.0|1446|hsa:388743|calpain-8 [EC:3.4.22.-]	GO:0043231//intracellular membrane-bounded organelle	GO:0046872//metal ion binding;GO:0004197//cysteine-type endopeptidase activity	GO:0019538//protein metabolic process	gi|221554549|ref|NP_001137434.1|/0/calpain-8 [Homo sapiens]
11037	5574.14	0.67	1.66	1.30895	Up	0.998572	STON1	1	K20067|1|0.0|1479|hsa:11037|stonin-1/2	GO:0030119//AP-type membrane coat adaptor complex;GO:0030119//AP-type membrane coat adaptor complex	-	GO:0006897//endocytosis;GO:0015031//protein transport;GO:0006897//endocytosis;GO:0015031//protein transport	gi|26787993|ref|NP_006864.2|/0/stonin-1 [Homo sapiens]
3119	1656	4.4825	11.1125	1.30981	Up	1	HLA-DQB1	1	K06752|1|4e-124|447|pps:100972994|major histocompatibility complex, class II	GO:0031224//intrinsic component of membrane;GO:0005764//lysosome;GO:0042611;GO:0031090//organelle membrane;GO:0031224//intrinsic component of membrane;GO:0005764//lysosome;GO:0042611;GO:0031090//organelle membrane;GO:0031224//intrinsic component of membrane;GO:0005764//lysosome;GO:0042611;GO:0031090//organelle membrane	GO:0004888//transmembrane signaling receptor activity;GO:0004888//transmembrane signaling receptor activity;GO:0004888//transmembrane signaling receptor activity	GO:0019221//cytokine-mediated signaling pathway;GO:0050851//antigen receptor-mediated signaling pathway;GO:0031294//lymphocyte costimulation;GO:0019221//cytokine-mediated signaling pathway;GO:0050851//antigen receptor-mediated signaling pathway;GO:0031294//lymphocyte costimulation;GO:0019221//cytokine-mediated signaling pathway;GO:0050851//antigen receptor-mediated signaling pathway;GO:0031294//l…	gi|795475409|ref|XP_011891807.1|/2.22071e-133/PREDICTED: HLA class II histocompatibility antigen, DQ beta 1 chain [Cercocebus atys]
253512	3752.97	8.89	22.0725	1.31199	Up	1	SLC25A30	3	K15106|1|9e-163|577|hsa:253512|solute carrier family 25 (mitochondrial carrier), member 14/30	GO:0019866//organelle inner membrane;GO:0043231//intracellular membrane-bounded organelle;GO:0031224//intrinsic component of membrane;GO:0019866//organelle inner membrane;GO:0043231//intracellular membrane-bounded organelle;GO:0031224//intrinsic component of membrane;GO:0019866//organelle inner membrane;GO:0043231//intracellular membrane-bounded organelle;GO:0031224//intrinsic component of membra…	-	GO:0046907//intracellular transport;GO:0046907//intracellular transport;GO:0046907//intracellular transport	gi|795260881|ref|XP_011919750.1|/3.88247e-169/PREDICTED: kidney mitochondrial carrier protein 1 isoform X1 [Cercocebus atys]
2022	2946.33	0.455	1.13	1.31238	Up	0.995994	ENG	1	K06526|1|0.0|1207|hsa:2022|endoglin	GO:0009986//cell surface;GO:0031224//intrinsic component of membrane;GO:0043235//receptor complex;GO:0044421;GO:0009986//cell surface;GO:0031224//intrinsic component of membrane;GO:0043235//receptor complex;GO:0044421;GO:0009986//cell surface;GO:0031224//intrinsic component of membrane;GO:0043235//receptor complex;GO:0044421	GO:0004675//transmembrane receptor protein serine/threonine kinase activity;GO:0048029//monosaccharide binding;GO:0030247//polysaccharide binding;GO:0005160//transforming growth factor beta receptor binding;GO:0032403//protein complex binding;GO:0042802//identical protein binding;GO:0019838//growth factor binding;GO:0005057//receptor signaling protein activity;GO:0004675//transmembrane receptor p…	GO:0007179//transforming growth factor beta receptor signaling pathway;GO:0032769//negative regulation of monooxygenase activity;GO:0001935//endothelial cell proliferation;GO:0048870//cell motility;GO:0001933//negative regulation of protein phosphorylation;GO:0007569//cell aging;GO:0001666//response to hypoxia;GO:0001934//positive regulation of protein phosphorylation;GO:0030509//BMP signaling pa…	gi|182091|gb|AAA35800.1|/0/endoglin precursor, partial [Homo sapiens]
214	4905.76	50.69	126.297	1.31705	Up	1	ALCAM	1	K06547|1|2e-70|270|hsa:214|activated leukocyte cell adhesion molecule	GO:0009986//cell surface;GO:0043005//neuron projection;GO:0031224//intrinsic component of membrane;GO:0044297//cell body;GO:0009986//cell surface;GO:0043005//neuron projection;GO:0031224//intrinsic component of membrane;GO:0044297//cell body;GO:0009986//cell surface;GO:0043005//neuron projection;GO:0031224//intrinsic component of membrane;GO:0044297//cell body;GO:0009986//cell surface;GO:0043005/…	GO:0005515//protein binding;GO:0005515//protein binding;GO:0005515//protein binding;GO:0005515//protein binding	GO:0007411//axon guidance;GO:0023052//signaling;GO:0007411//axon guidance;GO:0023052//signaling;GO:0007411//axon guidance;GO:0023052//signaling;GO:0007411//axon guidance;GO:0023052//signaling	gi|68163411|ref|NP_001618.2|/0/CD166 antigen isoform 1 precursor [Homo sapiens]
11248	5553	0.57	1.4225	1.31939	Up	0.993762	NXPH3	2	K16658|1|1e-154|551|ptr:104002950|neurexophilin-3	-	GO:0005515//protein binding	GO:0007186//G-protein coupled receptor signaling pathway	gi|694968847|ref|XP_009431218.1|/9.2351e-154/PREDICTED: neurexophilin-3 [Pan troglodytes]
2898	4671.67	0.4125	1.0325	1.32368	Up	0.998965	GRIK2	3	K05202|1|0.0|1772|cjc:100399182|glutamate receptor, ionotropic kainate 2	GO:0016021//integral component of membrane;GO:0030425//dendrite;GO:0044459;GO:0016021//integral component of membrane;GO:0030425//dendrite;GO:0044459;GO:0016021//integral component of membrane;GO:0030425//dendrite;GO:0044459	GO:0004970//ionotropic glutamate receptor activity;GO:0005231//excitatory extracellular ligand-gated ion channel activity;GO:0004970//ionotropic glutamate receptor activity;GO:0005231//excitatory extracellular ligand-gated ion channel activity;GO:0004970//ionotropic glutamate receptor activity;GO:0005231//excitatory extracellular ligand-gated ion channel activity	GO:0012502//induction of programmed cell death;GO:0006810//transport;GO:0006915//apoptotic process;GO:0048168//regulation of neuronal synaptic plasticity;GO:0007166//cell surface receptor signaling pathway;GO:0012502//induction of programmed cell death;GO:0006810//transport;GO:0006915//apoptotic process;GO:0048168//regulation of neuronal synaptic plasticity;GO:0007166//cell surface receptor signa…	gi|11386137|ref|NP_068775.1|/0/glutamate receptor ionotropic, kainate 2 isoform 1 precursor [Homo sapiens]
790952	3153	0.9125	2.285	1.3243	Up	0.999162	ESRG	1	K16349|1|3e-09|67.4|ptr:451055|natural cytotoxicity triggering receptor 3 ligand 1	-	-	-	gi|527504048|sp|Q1W209.2|ESRG_HUMAN/4.9938e-122/RecName: Full=Embryonic stem cell-related gene protein; Short=hES cell-related gene protein
51435	3551.78	1.945	4.8725	1.32489	Up	0.999134	SCARA3	2	K10062|1|7e-45|185|lcm:102347627|collectin sub-family member 12	GO:0012505//endomembrane system;GO:0031090//organelle membrane;GO:0043231//intracellular membrane-bounded organelle;GO:0031224//intrinsic component of membrane;GO:0012505//endomembrane system;GO:0031090//organelle membrane;GO:0043231//intracellular membrane-bounded organelle;GO:0031224//intrinsic component of membrane	GO:0004888//transmembrane signaling receptor activity;GO:0004888//transmembrane signaling receptor activity	GO:0006950//response to stress;GO:0009411//response to UV;GO:0006950//response to stress;GO:0009411//response to UV	gi|33598922|ref|NP_878185.1|/0/scavenger receptor class A member 3 isoform 2 [Homo sapiens]
100874019	517	2.3675	5.9325	1.32528	Up	0.999088	KLHL6-AS1	1	K00543|1|1e-06|54.7|pps:100968232|acetylserotonin N-methyltransferase [EC:2.1.1.4];K09061|3|5e-06|52.4|cjc:100395389|GC-rich sequence DNA-binding factor	-	-	-	gi|119586529|gb|EAW66125.1|/2.35256e-22/hCG2038557, partial [Homo sapiens]
375248	6269	1.6975	4.26	1.32744	Up	0.996645	ANKRD36	1	K17299|1|0.0|1635|ptr:470515|POTE ankyrin domain family protein	-	-	-	gi|256222280|ref|NP_001157787.1|/0/ankyrin repeat domain-containing protein 36A [Homo sapiens]
525	1956	0.78	1.9575	1.32747	Up	0.998056	ATP6V1B1	3	K02147|1|0.0|1025|hsa:525|V-type H+-transporting ATPase subunit B	GO:0005774//vacuolar membrane;GO:0033176//proton-transporting V-type ATPase complex;GO:0042995//cell projection;GO:0044459	GO:0019829//cation-transporting ATPase activity;GO:0015078//hydrogen ion transmembrane transporter activity;GO:0032559//adenyl ribonucleotide binding	GO:0006885//regulation of pH;GO:0015988//energy coupled proton transmembrane transport, against electrochemical gradient;GO:0015031//protein transport;GO:0007169//transmembrane receptor protein tyrosine kinase signaling pathway;GO:0050954//sensory perception of mechanical stimulus;GO:0015986//ATP synthesis coupled proton transport;GO:0042471//ear morphogenesis;GO:0006875//cellular metal ion homeo…	gi|19913426|ref|NP_001683.2|/0/V-type proton ATPase subunit B, kidney isoform [Homo sapiens]
100526693	3987	0.705	1.77	1.32805	Up	0.997138	ARPC4-TTLL3	1	K16608|1|0.0|902|hsa:26140|tubulin monoglycylase TTLL3/8 [EC:6.3.2.-]	-	-	-	gi|311771694|ref|NP_001185722.1|/0/ARPC4-TTLL3 fusion protein [Homo sapiens]
2009	4479	11.71	29.4125	1.32869	Up	1	EML1	2	K18595|1|0.0|1622|ptr:453155|echinoderm microtubule-associated protein-like 1/2	GO:0015630//microtubule cytoskeleton;GO:0015630//microtubule cytoskeleton	GO:0046872//metal ion binding;GO:0005488//binding	-	gi|56790930|ref|NP_004425.2|/0/echinoderm microtubule-associated protein-like 1 isoform b [Homo sapiens]
6560	4773	1.36	3.4175	1.32933	Up	0.999344	SLC12A4	1	K14427|1|0.0|2001|hsa:6560|solute carrier family 12 (potassium/chloride transporter), member 4/5/6	GO:0016021//integral component of membrane;GO:0016021//integral component of membrane;GO:0016021//integral component of membrane;GO:0016021//integral component of membrane	GO:0015377//cation:chloride symporter activity;GO:0015377//cation:chloride symporter activity;GO:0015377//cation:chloride symporter activity;GO:0015377//cation:chloride symporter activity	GO:0015698//inorganic anion transport;GO:0019725//cellular homeostasis;GO:0030001//metal ion transport;GO:0015698//inorganic anion transport;GO:0019725//cellular homeostasis;GO:0030001//metal ion transport;GO:0015698//inorganic anion transport;GO:0019725//cellular homeostasis;GO:0030001//metal ion transport;GO:0015698//inorganic anion transport;GO:0019725//cellular homeostasis;GO:0030001//metal i…	gi|225579065|ref|NP_001139435.1|/0/solute carrier family 12 member 4 isoform d [Homo sapiens]
162962	3333	0.885	2.225	1.33006	Up	0.99914	ZNF836	1	K09228|1|0.0|2010|hsa:162962|KRAB domain-containing zinc finger protein	GO:0043231//intracellular membrane-bounded organelle	GO:0046914//transition metal ion binding;GO:0003676//nucleic acid binding	GO:0006351//transcription, DNA-templated	gi|156627573|ref|NP_001096127.1|/0/zinc finger protein 836 [Homo sapiens]
5733	4972.85	0.705	1.7725	1.33009	Up	0.997464	PTGER3	1	K04260|1|6e-171|603|ptr:456940|prostaglandin E receptor 3	GO:0016021//integral component of membrane;GO:0012505//endomembrane system;GO:0016021//integral component of membrane;GO:0012505//endomembrane system;GO:0016021//integral component of membrane;GO:0012505//endomembrane system;GO:0016021//integral component of membrane;GO:0012505//endomembrane system;GO:0016021//integral component of membrane;GO:0012505//endomembrane system;GO:0016021//integral com…	GO:0004955//prostaglandin receptor activity;GO:0004955//prostaglandin receptor activity;GO:0004955//prostaglandin receptor activity;GO:0004955//prostaglandin receptor activity;GO:0004955//prostaglandin receptor activity;GO:0004955//prostaglandin receptor activity;GO:0004955//prostaglandin receptor activity;GO:0004955//prostaglandin receptor activity;GO:0004955//prostaglandin receptor activity	GO:0001660//fever generation;GO:0010467//gene expression;GO:0003014//renal system process;GO:0015698//inorganic anion transport;GO:0051480//regulation of cytosolic calcium ion concentration;GO:0007187//G-protein coupled receptor signaling pathway, coupled to cyclic nucleotide second messenger;GO:0001660//fever generation;GO:0010467//gene expression;GO:0003014//renal system process;GO:0015698//ino…	gi|2102647|dbj|BAA19959.1|/0/prostaglandin EP3 receptor subtype isoform [Homo sapiens]
79802	2582	0.675	1.6975	1.33045	Up	0.995783	HHIPL2	3	K15212|1|0.0|1216|ssc:100517774|TATA box-binding protein-associated factor RNA polymerase I subunit A;K06231|2|3e-76|289|phi:102114672|hedgehog interacting protein	-	GO:0048037//cofactor binding;GO:0016614//oxidoreductase activity, acting on CH-OH group of donors	GO:0044238//primary metabolic process	gi|124248546|ref|NP_079022.2|/0/HHIP-like protein 2 precursor [Homo sapiens]
64168	5140	14.85	37.48	1.33566	Up	1	NECAB1	4	-	GO:0044424	GO:0046872//metal ion binding;GO:0003824//catalytic activity	GO:0016999//antibiotic metabolic process	gi|397500999|ref|XP_003821189.1|/2.07478e-176/PREDICTED: N-terminal EF-hand calcium-binding protein 1 [Pan paniscus]
100616117	83	1.3675	3.455	1.33714	Up	0.989654	MIR4653	1	-	-	-	-	-
200879	2478	1.265	3.2175	1.3468	Up	1	LIPH	2	K19404|1|0.0|932|hsa:200879|phosphatidic acid-selective&#160;phospholipase A1 [EC:3.1.1.-]	GO:0044464	GO:0003824//catalytic activity	GO:0006629//lipid metabolic process	gi|21245106|ref|NP_640341.1|/0/lipase member H precursor [Homo sapiens]
84460	3592.71	1.215	3.0925	1.34782	Up	0.99879	ZMAT1	1	K10137|1|2e-08|64.7|sko:102802319|zinc finger, matrin type 3	GO:0031981//nuclear lumen;GO:0031981//nuclear lumen	GO:0046914//transition metal ion binding;GO:0046914//transition metal ion binding	-	gi|578838533|ref|XP_005262273.2|/0/PREDICTED: zinc finger matrin-type protein 1 isoform X5 [Homo sapiens]
693131	97	0.4325	1.105	1.35327	Up	0.948634	MIR548D2	1	-	-	-	-	-
22953	1759.1	0.9525	2.44	1.35709	Up	0.999197	P2RX2	2	K05216|1|0.0|822|pon:100455448|P2X purinoceptor 2	GO:0031224//intrinsic component of membrane;GO:0031224//intrinsic component of membrane;GO:0031224//intrinsic component of membrane;GO:0031224//intrinsic component of membrane;GO:0044464;GO:0031224//intrinsic component of membrane;GO:0031224//intrinsic component of membrane;GO:0031224//intrinsic component of membrane	GO:0016502;GO:0005231//excitatory extracellular ligand-gated ion channel activity;GO:0005515//protein binding;GO:0032559//adenyl ribonucleotide binding;GO:0016502;GO:0005231//excitatory extracellular ligand-gated ion channel activity;GO:0005515//protein binding;GO:0032559//adenyl ribonucleotide binding;GO:0016502;GO:0005231//excitatory extracellular ligand-gated ion channel activity;GO:0005515//p…	GO:0009967//positive regulation of signal transduction;GO:0035587//purinergic receptor signaling pathway;GO:0051259//protein oligomerization;GO:0010522//regulation of calcium ion transport into cytosol;GO:0009967//positive regulation of signal transduction;GO:0035587//purinergic receptor signaling pathway;GO:0051259//protein oligomerization;GO:0010522//regulation of calcium ion transport into cyt…	gi|27881423|ref|NP_036358.2|/0/P2X purinoceptor 2 isoform I [Homo sapiens]
6725	2402	0.4175	1.07	1.35776	Up	0.998407	SRMS	3	K08895|1|0.0|980|hsa:6725|tyrosine-protein kinase Srms [EC:2.7.10.2]	-	GO:0004713//protein tyrosine kinase activity;GO:0032559//adenyl ribonucleotide binding	GO:0006464//cellular protein modification process	gi|18250298|ref|NP_543013.1|/0/tyrosine-protein kinase Srms [Homo sapiens]
100127983	1053	19.0025	48.91	1.36394	Up	0.999279	C8orf88	1	-	-	-	-	gi|755505878|ref|XP_011248190.1|/5.23309e-62/PREDICTED: uncharacterized protein C8orf88 homolog isoform X2 [Mus musculus]
441263	1782	0.6675	1.72	1.36557	Up	0.999369	DTX2P1-UPK3BP1-PMS2P11	1	K06058|1|6e-142|506|ptr:100615650|deltex [EC:2.3.2.27]	-	-	-	gi|694922066|ref|XP_009451677.1|/2.74492e-161/PREDICTED: probable E3 ubiquitin-protein ligase DTX2 isoform X5 [Pan troglodytes]
139221	4184	0.465	1.2	1.36773	Up	0.998508	MUM1L1	4	-	-	-	-	gi|289577100|ref|NP_689636.3|/0/PWWP domain-containing protein MUM1L1 [Homo sapiens]
641455	6666	0.9775	2.525	1.36911	Up	0.998992	POTEM	1	K17299|1|0.0|853|ptr:739395|POTE ankyrin domain family protein	GO:0044444//cytoplasmic part	GO:0032559//adenyl ribonucleotide binding	-	gi|767918223|ref|XP_011509518.1|/0/PREDICTED: POTE ankyrin domain family member E isoform X1 [Homo sapiens]
1016	3203.2	1.8175	4.6975	1.36994	Up	0.998927	CDH18	1	K06805|1|0.0|1466|hsa:1016|cadherin 18, type 2	GO:0031224//intrinsic component of membrane;GO:0031224//intrinsic component of membrane	GO:0046872//metal ion binding;GO:0046872//metal ion binding	GO:0045216//cell-cell junction organization;GO:0016337//single organismal cell-cell adhesion;GO:0045216//cell-cell junction organization;GO:0016337//single organismal cell-cell adhesion	gi|634743272|ref|NP_001278886.1|/0/cadherin-18 isoform 3 preproprotein [Homo sapiens]
26140	4067.07	1.065	2.76	1.37381	Up	0.9988	TTLL3	1	K16608|1|4e-169|598|hsa:26140|tubulin monoglycylase TTLL3/8 [EC:6.3.2.-]	-	-	-	gi|694900160|ref|XP_009443142.1|/0/PREDICTED: tubulin monoglycylase TTLL3 isoform X13 [Pan troglodytes]
26777	138	0.51	1.3225	1.3747	Up	0.971079	SNORA71A	1	-	-	-	-	-
345079	2921	1.375	3.5675	1.37548	Up	0.998966	SOWAHB	1	K08803|1|9e-06|55.5|bfo:BRAFLDRAFT_93229|death-associated protein kinase [EC:2.7.11.1]	-	-	-	gi|71274172|ref|NP_001025041.1|/0/ankyrin repeat domain-containing protein SOWAHB [Homo sapiens]
51313	4814.35	4.2075	10.955	1.38055	Up	1	FAM198B	1	-	GO:0012505//endomembrane system;GO:0031224//intrinsic component of membrane;GO:0043231//intracellular membrane-bounded organelle;GO:0012505//endomembrane system;GO:0031224//intrinsic component of membrane;GO:0043231//intracellular membrane-bounded organelle;GO:0012505//endomembrane system;GO:0031224//intrinsic component of membrane;GO:0043231//intracellular membrane-bounded organelle	-	-	gi|32526911|ref|NP_057697.2|/0/protein FAM198B isoform 2 [Homo sapiens]
57658	2983.78	4.985	12.9975	1.38257	Up	0.999988	CALCOCO1	1	K10388|1|7e-14|82.4|ecb:100147640|plectin;K16072|2|2e-13|81.3|pale:102885132|ELKS/RAB6-interacting/CAST family member 1;K10402|4|2e-13|80.9|xma:102218030|kinesin family member 20	GO:0043231//intracellular membrane-bounded organelle;GO:0043231//intracellular membrane-bounded organelle;GO:0000785//chromatin;GO:0043231//intracellular membrane-bounded organelle;GO:0000785//chromatin	GO:0000975//regulatory region DNA binding;GO:0019904//protein domain specific binding;GO:0003713//transcription coactivator activity;GO:0000975//regulatory region DNA binding;GO:0019904//protein domain specific binding;GO:0003713//transcription coactivator activity;GO:0000975//regulatory region DNA binding;GO:0019904//protein domain specific binding;GO:0003713//transcription coactivator activity	GO:0030522//intracellular receptor signaling pathway;GO:0030522//intracellular receptor signaling pathway;GO:0006357//regulation of transcription from RNA polymerase II promoter;GO:0007166//cell surface receptor signaling pathway;GO:0030522//intracellular receptor signaling pathway;GO:0006357//regulation of transcription from RNA polymerase II promoter;GO:0007166//cell surface receptor signaling …	gi|14149742|ref|NP_065949.1|/0/calcium-binding and coiled-coil domain-containing protein 1 isoform 1 [Homo sapiens]
101927994	3516	4.39	11.455	1.38368	Up	0.999208	LINC01087	1	K17299|1|5e-06|56.6|ptr:101057753|POTE ankyrin domain family protein	-	-	-	gi|106322|pir||B34087/9.87987e-34/hypothetical protein (L1H 3' region) - human
441251	1064	0.8525	2.225	1.38403	Up	0.998883	SPDYE7P	2	K08694|1|1e-121|438|hsa:100505767|speedy	-	-	-	gi|768043721|ref|XP_011544803.1|/1.12984e-120/PREDICTED: putative speedy protein-like protein 2 isoform X2 [Homo sapiens]
442590	3147	1.04	2.715	1.38437	Up	0.999328	SPDYE5	1	K08694|1|0.0|746|hsa:442590|speedy	-	-	-	gi|807066302|ref|NP_001293070.1|/0/putative speedy protein E5 [Homo sapiens]
4093	5510.49	0.44	1.15	1.38606	Up	0.998661	SMAD9	2	K16791|1|0.0|835|mcf:101926495|mothers against decapentaplegic homolog 9	GO:0043234//protein complex;GO:0031981//nuclear lumen;GO:0044444//cytoplasmic part;GO:0043234//protein complex;GO:0031981//nuclear lumen;GO:0044444//cytoplasmic part	GO:0001071//nucleic acid binding transcription factor activity;GO:0005072//transforming growth factor beta receptor, cytoplasmic mediator activity;GO:0001071//nucleic acid binding transcription factor activity;GO:0005072//transforming growth factor beta receptor, cytoplasmic mediator activity	GO:0035295//tube development;GO:0045595//regulation of cell differentiation;GO:0007420//brain development;GO:0014070//response to organic cyclic compound;GO:0006351//transcription, DNA-templated;GO:0003006//developmental process involved in reproduction;GO:0007178//transmembrane receptor protein serine/threonine kinase signaling pathway;GO:0006950//response to stress;GO:0006464//cellular protein …	gi|5174519|ref|NP_005896.1|/0/mothers against decapentaplegic homolog 9 isoform b [Homo sapiens]
113263	4811	4.235	11.07	1.38622	Up	1	GLCCI1	3	K15275|1|5e-49|199|apla:101803377|solute carrier family 35 (UDP-galactose transporter), member B1	-	-	-	gi|55742678|ref|NP_612435.1|/0/glucocorticoid-induced transcript 1 protein [Homo sapiens]
1021	11628	1.5075	3.955	1.39152	Up	0.998604	CDK6	6	K02091|1|0.0|657|rro:104682750|cyclin-dependent kinase 6 [EC:2.7.11.22]	GO:0043231//intracellular membrane-bounded organelle;GO:0043234//protein complex;GO:0031252//cell leading edge;GO:0044444//cytoplasmic part;GO:0043231//intracellular membrane-bounded organelle;GO:0043234//protein complex;GO:0031252//cell leading edge;GO:0044444//cytoplasmic part	GO:0004674//protein serine/threonine kinase activity;GO:0005515//protein binding;GO:0032559//adenyl ribonucleotide binding;GO:0004674//protein serine/threonine kinase activity;GO:0005515//protein binding;GO:0032559//adenyl ribonucleotide binding	GO:0043696;GO:0045596//negative regulation of cell differentiation;GO:0051707//response to other organism;GO:0051726//regulation of cell cycle;GO:0032844//regulation of homeostatic process;GO:0022008//neurogenesis;GO:0008285//negative regulation of cell proliferation;GO:0048534//hematopoietic or lymphoid organ development;GO:0051318;GO:0008284//positive regulation of cell proliferation;GO:0010467…	gi|4502741|ref|NP_001250.1|/0/cyclin-dependent kinase 6 [Homo sapiens]
6459	2506	0.3875	1.0175	1.39276	Up	0.998007	SH3GL1P2	1	K11247|1|0.0|620|nle:101178025|endophilin-A	GO:0005769//early endosome	GO:0005488//binding	GO:0007399//nervous system development;GO:0016192//vesicle-mediated transport;GO:0023052//signaling	gi|821026867|ref|XP_012359003.1|/0/PREDICTED: LOW QUALITY PROTEIN: endophilin-A2-like [Nomascus leucogenys]
10690	12815	1.5775	4.145	1.39373	Up	0.99863	FUT9	3	K03663|1|0.0|771|ptg:102953801|4-galactosyl-N-acetylglucosaminide 3-alpha-L-fucosyltransferase [EC:2.4.1.152]	GO:0031224//intrinsic component of membrane;GO:0000139//Golgi membrane	GO:0008417//fucosyltransferase activity	GO:0019317;GO:0048731//system development;GO:0006464//cellular protein modification process	gi|961745701|ref|XP_014933541.1|/0/PREDICTED: alpha-(1,3)-fucosyltransferase 9 isoform X1 [Acinonyx jubatus]
132014	2682.88	0.6275	1.655	1.39914	Up	0.99686	IL17RE	1	K05168|1|0.0|1085|hsa:132014|interleukin 17 receptor E	GO:0016020//membrane;GO:0044424;GO:0031224//intrinsic component of membrane;GO:0044424;GO:0031224//intrinsic component of membrane;GO:0044424;GO:0031224//intrinsic component of membrane;GO:0044424;GO:0031224//intrinsic component of membrane	GO:0004871//signal transducer activity;GO:0004871//signal transducer activity;GO:0004871//signal transducer activity;GO:0004871//signal transducer activity	-	gi|301129232|ref|NP_705616.2|/0/interleukin-17 receptor E isoform 5 [Homo sapiens]
84632	4019	0.96	2.5325	1.39946	Up	0.994704	AFAP1L2	3	K18616|1|1e-107|394|clv:102089974|actin filament associated protein 1	GO:0044424;GO:0044424;GO:0044424	GO:0030295//protein kinase activator activity;GO:0019904//protein domain specific binding;GO:0030295//protein kinase activator activity;GO:0019904//protein domain specific binding;GO:0030295//protein kinase activator activity;GO:0019904//protein domain specific binding	GO:0009967//positive regulation of signal transduction;GO:0000278//mitotic cell cycle;GO:0006952//defense response;GO:0006355//regulation of transcription, DNA-templated;GO:0001819//positive regulation of cytokine production;GO:0045860//positive regulation of protein kinase activity;GO:0009967//positive regulation of signal transduction;GO:0000278//mitotic cell cycle;GO:0006952//defense response;…	gi|50897850|ref|NP_001001936.1|/0/actin filament-associated protein 1-like 2 isoform 1 [Homo sapiens]
55	2504.66	0.5625	1.4875	1.40296	Up	1	ACPP	1	K19283|1|1e-179|633|hsa:55|prostatic aicd phosphatase [EC:3.1.3.2 3.1.3.5]	GO:0005764//lysosome;GO:0005764//lysosome;GO:0005764//lysosome	GO:0016791//phosphatase activity;GO:0016791//phosphatase activity;GO:0016791//phosphatase activity	-	gi|197116348|ref|NP_001127666.1|/0/prostatic acid phosphatase isoform TM-PAP precursor [Homo sapiens]
23650	2767.91	0.805	2.135	1.40718	Up	0.997518	TRIM29	1	K12010|1|2e-168|595|hsa:23650|tripartite motif-containing protein 29	GO:0044424;GO:0044424	GO:0046914//transition metal ion binding;GO:0001071//nucleic acid binding transcription factor activity;GO:0046914//transition metal ion binding;GO:0001071//nucleic acid binding transcription factor activity	GO:0006351//transcription, DNA-templated;GO:0006351//transcription, DNA-templated	gi|17402909|ref|NP_036233.2|/0/tripartite motif-containing protein 29 [Homo sapiens]
9311	2223.26	0.5	1.3275	1.40871	Up	0.995926	ASIC3	1	K04830|1|0.0|602|aml:100483736|acid-sensing ion channel 3	GO:0016021//integral component of membrane;GO:0044424;GO:0016021//integral component of membrane;GO:0044424;GO:0016021//integral component of membrane;GO:0044424;GO:0016021//integral component of membrane;GO:0044424	GO:0005272//sodium channel activity;GO:0005272//sodium channel activity;GO:0005272//sodium channel activity;GO:0005272//sodium channel activity	GO:0050877//neurological system process;GO:0030001//metal ion transport;GO:0023052//signaling;GO:0050877//neurological system process;GO:0030001//metal ion transport;GO:0023052//signaling;GO:0050877//neurological system process;GO:0030001//metal ion transport;GO:0023052//signaling;GO:0050877//neurological system process;GO:0030001//metal ion transport;GO:0023052//signaling	gi|9998948|ref|NP_064718.1|/0/acid-sensing ion channel 3 isoform c [Homo sapiens]
1558	1957.68	0.705	1.8725	1.40927	Up	0.999243	CYP2C8	3	K17718|1|0.0|858|hsa:1558|cytochrome P450, family 2, subfamily C, polypeptide 8 [EC:1.14.14.1]	GO:0031090//organelle membrane;GO:0043231//intracellular membrane-bounded organelle;GO:0031090//organelle membrane;GO:0043231//intracellular membrane-bounded organelle;GO:0031090//organelle membrane;GO:0043231//intracellular membrane-bounded organelle;GO:0031090//organelle membrane;GO:0043231//intracellular membrane-bounded organelle	GO:0005506//iron ion binding;GO:0016712//oxidoreductase activity, acting on paired donors, with incorporation or reduction of molecular oxygen, reduced flavin or flavoprotein as one donor, and incorporation of one atom of oxygen;GO:0033695;GO:0005506//iron ion binding;GO:0016712//oxidoreductase activity, acting on paired donors, with incorporation or reduction of molecular oxygen, reduced flavin …	GO:0042493//response to drug;GO:0044237//cellular metabolic process;GO:0055114//oxidation-reduction process;GO:0042493//response to drug;GO:0044237//cellular metabolic process;GO:0055114//oxidation-reduction process;GO:0042493//response to drug;GO:0044237//cellular metabolic process;GO:0055114//oxidation-reduction process;GO:0042493//response to drug;GO:0044237//cellular metabolic process;GO:0055…	gi|42543301|pdb|1PQ2|A/0/Chain A, Crystal Structure Of Human Drug Metabolizing Cytochrome P450 2c8
346389	9167	1.9375	5.155	1.41178	Up	0.999215	MACC1	3	K20066|1|2e-179|634|ngi:103735747|SH3 domain-binding protein 4	GO:0016020//membrane;GO:0031981//nuclear lumen	GO:0005102//receptor binding	GO:0048522	gi|157502191|ref|NP_877439.3|/0/metastasis-associated in colon cancer protein 1 [Homo sapiens]
285955	2691	1.1325	3.02	1.41504	Up	0.998873	SPDYE1	2	K08694|1|0.0|641|hsa:285955|speedy	-	-	-	gi|296452952|sp|Q8NFV5.3|SPDE1_HUMAN/0/RecName: Full=Speedy protein E1; AltName: Full=Williams-Beuren syndrome chromosomal region 19 protein
10268	1376	1.0175	2.715	1.41592	Up	0.997302	RAMP3	2	K08449|1|3e-86|201|mcf:101926441|receptor activity modifying protein 3	GO:0000323//lytic vacuole;GO:0016021//integral component of membrane	GO:0004872//receptor activity;GO:0022892//substrate-specific transporter activity	GO:0007186//G-protein coupled receptor signaling pathway;GO:0006897//endocytosis;GO:0015031//protein transport	gi|545686781|ref|NP_001270295.1|/2.90794e-85/receptor activity-modifying protein 3 precursor [Macaca fascicularis]
401261	2744	0.6475	1.73	1.41782	Up	0.999026	LOC401261	1	-	-	-	-	gi|119624508|gb|EAX04103.1|/2.30856e-43/hCG2001898 [Homo sapiens]
8356	478	0.4325	1.1575	1.42024	Up	0.969646	HIST1H3J	2	K11253|1|7e-73|274|rno:679994|histone H3	-	-	-	gi|672081889|ref|XP_008769906.1|/4.61505e-72/PREDICTED: uncharacterized protein Hist1h3a isoform X2 [Rattus norvegicus]
9037	11825	0.61	1.635	1.42241	Up	0.998333	SEMA5A	2	K06841|1|0.0|2125|hsa:9037|semaphorin 5	GO:0031224//intrinsic component of membrane	GO:0004871//signal transducer activity	GO:0006935//chemotaxis;GO:0048731//system development;GO:0048869//cellular developmental process;GO:0007154//cell communication	gi|147904700|ref|NP_003957.2|/0/semaphorin-5A precursor [Homo sapiens]
22898	5458	0.6475	1.7375	1.42406	Up	0.999314	DENND3	2	K20162|1|0.0|2212|hsa:22898|DENN domain-containing protein 3	-	-	-	gi|119612623|gb|EAW92217.1|/0/DENN/MADD domain containing 3, isoform CRA_b [Homo sapiens]
406886	87	1.285	3.4575	1.42796	Up	0.986855	MIRLET7D	1	-	-	-	-	-
6792	8773.5	1.2925	3.4825	1.42996	Up	0.998927	CDKL5	2	K08824|1|0.0|2008|hsa:6792|cyclin-dependent kinase-like [EC:2.7.11.22]	GO:0031981//nuclear lumen;GO:0030426//growth cone;GO:0030425//dendrite;GO:0001726//ruffle;GO:0031981//nuclear lumen;GO:0030426//growth cone;GO:0030425//dendrite;GO:0001726//ruffle	GO:0004674//protein serine/threonine kinase activity;GO:0032559//adenyl ribonucleotide binding;GO:0017048//Rho GTPase binding;GO:0004674//protein serine/threonine kinase activity;GO:0032559//adenyl ribonucleotide binding;GO:0017048//Rho GTPase binding	GO:0030307//positive regulation of cell growth;GO:0031346//positive regulation of cell projection organization;GO:0010975//regulation of neuron projection development;GO:0006468//protein phosphorylation;GO:0016477//cell migration;GO:0030307//positive regulation of cell growth;GO:0031346//positive regulation of cell projection organization;GO:0010975//regulation of neuron projection development;GO…	gi|4507281|ref|NP_003150.1|/0/cyclin-dependent kinase-like 5 [Homo sapiens]
1953	7450	1.0425	2.8125	1.43181	Up	0.998545	MEGF6	3	K02258|1|8e-150|535|hmg:100209451|cytochrome c oxidase assembly protein subunit 11	-	GO:0046872//metal ion binding	-	gi|72534475|dbj|BAE19678.1|/0/hypothetical protein [Homo sapiens]
101927855	457	2.9325	7.94	1.43701	Up	0.998969	LOC101927855	1	-	-	-	-	gi|795131716|ref|XP_011834539.1|/6.00415e-32/PREDICTED: uncharacterized protein LOC105539051 [Mandrillus leucophaeus]
22998	6176.15	0.9325	2.53	1.43996	Up	1	LIMCH1	1	K06084|1|2e-31|141|ptr:452604|F-box protein 20	-	GO:0046914//transition metal ion binding;GO:0008092//cytoskeletal protein binding;GO:0046914//transition metal ion binding;GO:0008092//cytoskeletal protein binding;GO:0046914//transition metal ion binding;GO:0008092//cytoskeletal protein binding;GO:0046872//metal ion binding;GO:0046914//transition metal ion binding;GO:0008092//cytoskeletal protein binding;GO:0046914//transition metal ion binding;…	GO:0030036//actin cytoskeleton organization;GO:0030036//actin cytoskeleton organization;GO:0030036//actin cytoskeleton organization;GO:0030036//actin cytoskeleton organization;GO:0030036//actin cytoskeleton organization;GO:0030036//actin cytoskeleton organization;GO:0030036//actin cytoskeleton organization;GO:0030036//actin cytoskeleton organization;GO:0030036//actin cytoskeleton organization;GO:…	gi|163310745|ref|NP_001106189.1|/0/LIM and calponin homology domains-containing protein 1 isoform c [Homo sapiens]
3554	4908.44	2.68	7.275	1.44071	Up	0.999999	IL1R1	1	K04386|1|0.0|716|pps:100972617|interleukin 1 receptor type I	GO:0016021//integral component of membrane;GO:0016021//integral component of membrane;GO:0016021//integral component of membrane;GO:0016021//integral component of membrane;GO:0016021//integral component of membrane;GO:0016021//integral component of membrane;GO:0016021//integral component of membrane;GO:0016021//integral component of membrane;GO:0016021//integral component of membrane;GO:0016021//…	GO:0004908//interleukin-1 receptor activity;GO:0070851//growth factor receptor binding;GO:0004908//interleukin-1 receptor activity;GO:0070851//growth factor receptor binding;GO:0004908//interleukin-1 receptor activity;GO:0070851//growth factor receptor binding;GO:0004908//interleukin-1 receptor activity;GO:0070851//growth factor receptor binding;GO:0004908//interleukin-1 receptor activity;GO:0070…	GO:0007292//female gamete generation;GO:0019221//cytokine-mediated signaling pathway;GO:0006952//defense response;GO:0010035//response to inorganic substance;GO:0002376//immune system process;GO:0007292//female gamete generation;GO:0019221//cytokine-mediated signaling pathway;GO:0006952//defense response;GO:0010035//response to inorganic substance;GO:0002376//immune system process;GO:0007292//fem…	gi|4504659|ref|NP_000868.1|/0/interleukin-1 receptor type 1 isoform 1 precursor [Homo sapiens]
2974	3025	1.0725	2.9225	1.44623	Up	0.999088	GUCY1B2	2	K12319|1|0.0|1194|ptr:452727|guanylate cyclase soluble subunit beta [EC:4.6.1.2]	GO:0044424	GO:0009975//cyclase activity;GO:0032561//guanyl ribonucleotide binding;GO:0005506//iron ion binding	GO:0007599//hemostasis;GO:0001775//cell activation;GO:0007165//signal transduction	gi|14916977|sp|O75343.2|GCYB2_HUMAN/0/RecName: Full=Guanylate cyclase soluble subunit beta-2; Short=GCS-beta-2
6781	3897	11.3225	30.855	1.44631	Up	1	STC1	2	-	GO:0044459;GO:0044424;GO:0044421	GO:0005102//receptor binding	GO:0001666//response to hypoxia;GO:0033273//response to vitamin;GO:0006875//cellular metal ion homeostasis;GO:0051384//response to glucocorticoid;GO:0007165//signal transduction;GO:0007275//multicellular organism development;GO:0007154//cell communication;GO:0003006//developmental process involved in reproduction;GO:0051591//response to cAMP	gi|803011834|ref|XP_004004231.2|/2.55732e-139/PREDICTED: stanniocalcin-1 [Ovis aries]
143686	9443	1.005	2.75	1.45224	Up	0.998933	SESN3	1	K10141|1|0.0|716|ssc:100526065|sestrin 1/3	GO:0043231//intracellular membrane-bounded organelle	-	GO:0022402//cell cycle process	gi|31377591|ref|NP_653266.2|/0/sestrin-3 isoform 1 [Homo sapiens]
692223	142	0.6025	1.65	1.45343	Up	0.957811	SNORD97	1	-	-	-	-	-
8944	65	2.035	5.6	1.4604	Up	0.973948	SNORD73A	1	-	-	-	-	-
11254	4579	29.4175	81.135	1.46365	Up	1	SLC6A14	4	K05038|1|0.0|1237|hsa:11254|solute carrier family 6 (neurotransmitter transporter, amino acid) member 5/7/9/14	GO:0005903//brush border;GO:0016021//integral component of membrane	GO:0015291//secondary active transmembrane transporter activity;GO:0005326//neurotransmitter transporter activity;GO:0005275//amine transmembrane transporter activity	GO:0006865//amino acid transport;GO:0042221//response to chemical;GO:0006807//nitrogen compound metabolic process;GO:0019752//carboxylic acid metabolic process	gi|6005715|ref|NP_009162.1|/0/sodium- and chloride-dependent neutral and basic amino acid transporter B(0+) [Homo sapiens]
222223	6627.69	1.3725	3.7875	1.46444	Up	0.998981	KIAA1324L	1	K17495|1|1e-05|56.6|bfo:BRAFLDRAFT_118457|CUB and sushi domain-containing protein	GO:0031224//intrinsic component of membrane;GO:0031224//intrinsic component of membrane;GO:0031224//intrinsic component of membrane;GO:0031224//intrinsic component of membrane	-	-	gi|218505750|ref|NP_001136221.1|/0/UPF0577 protein KIAA1324-like isoform 1 precursor [Homo sapiens]
677825	132	0.4075	1.125	1.46505	Up	0.932556	SNORA44	1	-	-	-	-	-
2970	3627	8.485	23.4725	1.46798	Up	0.999731	GTF2IP1	3	K03121|1|0.0|1078|pps:100977963|transcription initiation factor TFII-I	GO:0031981//nuclear lumen	GO:0005488//binding;GO:0001071//nucleic acid binding transcription factor activity	GO:0006352//DNA-templated transcription, initiation;GO:0023052//signaling	gi|14670352|ref|NP_127493.1|/0/general transcription factor II-I isoform 2 [Homo sapiens]
693220	98	1.6525	4.58	1.4707	Up	0.998907	MIR635	1	-	-	-	-	-
101928591	1705	0.4475	1.2425	1.47329	Up	0.997908	LOC101928591	1	-	-	-	-	gi|2072948|gb|AAC51261.1|/2.67001e-57/putative p150 [Homo sapiens]
729597	3145	2.125	5.9175	1.47752	Up	0.999269	SPDYE6	2	K08694|1|0.0|764|hsa:729597|speedy	-	-	-	gi|628601843|ref|NP_001139682.2|/0/putative speedy protein E6 [Homo sapiens]
149620	2843	0.3675	1.025	1.47981	Up	0.998776	CHIAP2	2	K01183|1|7e-161|347|cjc:100402131|chitinase [EC:3.2.1.14]	-	-	-	gi|725581344|ref|XP_010342322.1|/4.473e-160/PREDICTED: acidic mammalian chitinase-like [Saimiri boliviensis boliviensis]
169200	4817.85	160.61	448.03	1.48003	Up	1	TMEM64	1	K18411|1|5e-31|140|nvi:100123742|protein maelstrom;K02146|3|1e-13|82.4|isc:IscW_ISCW002101|V-type H+-transporting ATPase subunit d	GO:0016020//membrane	-	-	gi|223555958|ref|NP_001008495.2|/1.14799e-144/transmembrane protein 64 isoform 1 [Homo sapiens]
122060	2387.24	1.635	4.5625	1.48053	Up	1	SLAIN1	1	K16580|1|2e-179|632|ngi:103746816|SLAIN motif-containing protein 1/2	-	-	-	gi|338968860|ref|NP_001229797.1|/0/SLAIN motif-containing protein 1 isoform C [Homo sapiens]
103021295	464	2.3375	6.5275	1.48156	Up	0.994898	LOC103021295	2	-	-	-	-	-
100506985	973	0.5325	1.49	1.48446	Up	0.999441	LOC100506985	1	-	-	-	-	-
677776	131	0.405	1.135	1.4867	Up	0.968902	SCARNA8	1	-	-	-	-	-
51351	6404	4.5175	12.6775	1.48867	Up	1	ZNF117	3	K09228|1|0.0|1516|nle:100586909|KRAB domain-containing zinc finger protein	GO:0043231//intracellular membrane-bounded organelle	GO:0046914//transition metal ion binding;GO:0003676//nucleic acid binding;GO:0001071//nucleic acid binding transcription factor activity	GO:0006351//transcription, DNA-templated	gi|795333028|ref|XP_011781099.1|/0/PREDICTED: LOW QUALITY PROTEIN: zinc finger protein 85-like [Colobus angolensis palliatus]
51170	1903	1.95	5.4725	1.48873	Up	0.999192	HSD17B11	4	K15734|1|8e-71|270|apla:101805250|all-trans-retinol dehydrogenase (NAD+) [EC:1.1.1.105]	GO:0043231//intracellular membrane-bounded organelle	GO:0033764//steroid dehydrogenase activity, acting on the CH-OH group of donors, NAD or NADP as acceptor	GO:0006706//steroid catabolic process	gi|613410229|ref|NP_057329.3|/6.20815e-159/estradiol 17-beta-dehydrogenase 11 precursor [Homo sapiens]
105369980	600	0.375	1.0525	1.48886	Up	0.991093	LOC105369980	1	K04460|1|6e-11|58.2|pps:103785929|serine/threonine-protein phosphatase 5 [EC:3.1.3.16];K15289|5|8e-10|46.2|ggo:101143670|solute carrier family 35, member F5	-	-	-	gi|694952630|ref|XP_009424680.1|/5.42657e-53/PREDICTED: uncharacterized protein LOC101058990 [Pan troglodytes]
202333	12911	0.725	2.04	1.49252	Up	0.998924	CMYA5	4	K08285|1|2e-26|126|bfo:BRAFLDRAFT_125602|midline 1 [EC:2.3.2.27];K17582|3|6e-26|124|nvi:100120806|antigen KI-67	GO:0044444//cytoplasmic part	GO:0005515//protein binding	-	gi|62241003|ref|NP_705838.3|/0/cardiomyopathy-associated protein 5 [Homo sapiens]
101927934	1108	0.5375	1.515	1.49498	Up	0.999206	LOC101927934	1	K14404|1|3e-11|72.0|cjc:103793372|cleavage and polyadenylation specificity factor subunit 4;K17985|2|4e-11|71.6|hsa:55626|activating molecule in BECN1-regulated autophagy protein 1;K01064|3|7e-08|52.8|mcf:102130297|wingless-type MMTV integration site family, member 9	-	-	-	gi|194379866|dbj|BAG58285.1|/2.77848e-16/unnamed protein product [Homo sapiens]
100132101	1779	0.6225	1.76	1.49943	Up	1	HERC2P7	1	K10595|1|9e-58|163|nle:100585860|E3 ubiquitin-protein ligase HERC2 [EC:2.3.2.26]	GO:0019866//organelle inner membrane;GO:0000152//nuclear ubiquitin ligase complex	GO:0030695//GTPase regulator activity;GO:0019787//ubiquitin-like protein transferase activity;GO:0005506//iron ion binding	GO:0006259//DNA metabolic process;GO:0007088//regulation of mitotic nuclear division;GO:0016567//protein ubiquitination;GO:0048232//male gamete generation;GO:0015031//protein transport	gi|767895638|ref|XP_011506778.1|/1.37374e-68/PREDICTED: E3 ubiquitin-protein ligase HERC2-like isoform X1 [Homo sapiens]
10396	8225	0.47	1.3325	1.5034	Up	0.999039	ATP8A1	2	K14802|1|0.0|2285|hsa:10396|phospholipid-transporting ATPase [EC:3.6.3.1]	GO:0031224//intrinsic component of membrane;GO:0030667//secretory granule membrane;GO:0031224//intrinsic component of membrane;GO:0030667//secretory granule membrane	GO:0042625//ATPase coupled ion transmembrane transporter activity;GO:0046872//metal ion binding;GO:0005548//phospholipid transporter activity;GO:0008324//cation transmembrane transporter activity;GO:0032559//adenyl ribonucleotide binding;GO:0042625//ATPase coupled ion transmembrane transporter activity;GO:0046872//metal ion binding;GO:0005548//phospholipid transporter activity;GO:0008324//cation …	GO:0009206;GO:0006811//ion transport;GO:0006869//lipid transport;GO:0009206;GO:0006811//ion transport;GO:0006869//lipid transport	gi|62088954|dbj|BAD92924.1|/0/ATPase, aminophospholipid transporter (APLT), class I, type 8A, member 1 variant [Homo sapiens]
9628	2283.64	0.5375	1.525	1.50447	Up	0.998419	RGS6	1	K16449|1|0.0|863|ptr:453009|regulator of G-protein signaling	GO:0031234//extrinsic component of cytoplasmic side of plasma membrane;GO:0031234//extrinsic component of cytoplasmic side of plasma membrane;GO:0031234//extrinsic component of cytoplasmic side of plasma membrane;GO:0031234//extrinsic component of cytoplasmic side of plasma membrane;GO:0031234//extrinsic component of cytoplasmic side of plasma membrane;GO:0031234//extrinsic component of cytoplasm…	GO:0008047//enzyme activator activity;GO:0060089;GO:0008047//enzyme activator activity;GO:0008047//enzyme activator activity;GO:0060089;GO:0008047//enzyme activator activity;GO:0008047//enzyme activator activity;GO:0060089;GO:0008047//enzyme activator activity;GO:0008047//enzyme activator activity;GO:0060089;GO:0008047//enzyme activator activity;GO:0060089;GO:0008047//enzyme activator activity;GO…	GO:0007186//G-protein coupled receptor signaling pathway;GO:0045597//positive regulation of cell differentiation;GO:0007186//G-protein coupled receptor signaling pathway;GO:0045597//positive regulation of cell differentiation;GO:0007186//G-protein coupled receptor signaling pathway;GO:0045597//positive regulation of cell differentiation;GO:0007186//G-protein coupled receptor signaling pathway;GO:…	gi|325053676|ref|NP_001191346.1|/0/regulator of G-protein signaling 6 isoform 3 [Homo sapiens]
154091	5599	0.41	1.165	1.50663	Up	0.999315	SLC2A12	2	K08149|1|0.0|1112|hsa:154091|MFS transporter, SP family, solute carrier family 2 (facilitated glucose transporter), member 12	GO:0044444//cytoplasmic part;GO:0031224//intrinsic component of membrane	GO:0005355//glucose transmembrane transporter activity	GO:0071702//organic substance transport	gi|21553331|ref|NP_660159.1|/0/solute carrier family 2, facilitated glucose transporter member 12 [Homo sapiens]
5345	2184.04	0.3875	1.1025	1.50851	Up	0.997477	SERPINF2	3	K03983|1|0.0|957|ptr:454412|alpha-2-antiplasmin	GO:0031091//platelet alpha granule;GO:0044421;GO:0031091//platelet alpha granule;GO:0044421;GO:0031091//platelet alpha granule;GO:0044421	GO:0004866//endopeptidase inhibitor activity;GO:0019899//enzyme binding;GO:0004866//endopeptidase inhibitor activity;GO:0019899//enzyme binding;GO:0004866//endopeptidase inhibitor activity;GO:0019899//enzyme binding	GO:0030194//positive regulation of blood coagulation;GO:0001775//cell activation;GO:0002526//acute inflammatory response;GO:0006887//exocytosis;GO:0006508//proteolysis;GO:0042221//response to chemical;GO:0030195//negative regulation of blood coagulation;GO:0010466//negative regulation of peptidase activity;GO:0030194//positive regulation of blood coagulation;GO:0001775//cell activation;GO:0002526…	gi|260064050|ref|NP_001159393.1|/0/alpha-2-antiplasmin isoform b precursor [Homo sapiens]
2348	982	1.7875	5.09	1.50972	Up	0.998251	FOLR1	3	K13649|1|1e-138|494|hsa:2348|folate receptor	GO:0016021//integral component of membrane;GO:0016021//integral component of membrane;GO:0016021//integral component of membrane;GO:0016021//integral component of membrane	GO:0004871//signal transducer activity;GO:0016597//amino acid binding;GO:0004871//signal transducer activity;GO:0016597//amino acid binding;GO:0004871//signal transducer activity;GO:0016597//amino acid binding;GO:0004871//signal transducer activity;GO:0016597//amino acid binding	GO:0006865//amino acid transport;GO:0006897//endocytosis;GO:0006865//amino acid transport;GO:0006897//endocytosis;GO:0006865//amino acid transport;GO:0006897//endocytosis;GO:0006865//amino acid transport;GO:0006897//endocytosis	gi|4758400|ref|NP_000793.1|/8.60391e-138/folate receptor alpha precursor [Homo sapiens]
3748	3302.05	1.5375	4.38	1.51034	Up	0.998927	KCNC3	1	K04889|1|3e-47|139|tup:106733159|potassium voltage-gated channel Shaw-related subfamily C member 3	GO:0016021//integral component of membrane;GO:0045202//synapse;GO:0033267;GO:0032589//neuron projection membrane;GO:0043025//neuronal cell body	GO:0005267//potassium channel activity	GO:0050804//modulation of synaptic transmission;GO:0034220//ion transmembrane transport;GO:0030001//metal ion transport	gi|34534428|dbj|BAC87004.1|/1.43912e-50/unnamed protein product [Homo sapiens]
340485	2852	3.0875	8.8075	1.51229	Up	1	ACER2	2	K01441|1|1e-164|583|pps:100971165|alkaline ceramidase [EC:3.5.1.23]	GO:0031228//intrinsic component of Golgi membrane	GO:0016811//hydrolase activity, acting on carbon-nitrogen (but not peptide) bonds, in linear amides	GO:0033578//protein glycosylation in Golgi;GO:0006670//sphingosine metabolic process;GO:0007162//negative regulation of cell adhesion;GO:0033189//response to vitamin A;GO:0008283//cell proliferation;GO:0001952//regulation of cell-matrix adhesion	gi|829791376|ref|XP_012625217.1|/1.27827e-169/PREDICTED: alkaline ceramidase 2 [Microcebus murinus]
84084	3077	2.1675	6.1875	1.51332	Up	1	RAB6C	2	K07895|1|1e-138|496|hsa:84084|Ras-related protein Rab-6C	GO:0044464	GO:0017111//nucleoside-triphosphatase activity;GO:0032561//guanyl ribonucleotide binding	GO:0006810//transport;GO:0035556//intracellular signal transduction;GO:0009207;GO:0042221//response to chemical	gi|116875763|ref|NP_115520.2|/1.07649e-137/ras-related protein Rab-6C [Homo sapiens]
375775	4855	0.4275	1.2225	1.51584	Up	0.998959	PNPLA7	2	K14676|1|0.0|2464|pps:100994628|lysophospholipid hydrolase [EC:3.1.1.5]	-	-	-	gi|614458145|ref|NP_689499.4|/0/patatin-like phospholipase domain-containing protein 7 isoform b [Homo sapiens]
57000	4770	0.7	2.0025	1.51638	Up	1	GSN-AS1	1	K12581|1|3e-28|99.8|nle:100584332|CCR4-NOT transcription complex subunit 7/8;K17985|3|1e-27|128|hsa:55626|activating molecule in BECN1-regulated autophagy protein 1;K15696|4|3e-23|114|nle:100581015|RING finger protein 113B;K02927|5|9e-22|109|nle:100604619|large subunit ribosomal protein L40e	-	-	-	gi|9587088|gb|AAF89164.1|/1.12024e-75/MOST2 [Homo sapiens]
115677	1968.34	0.765	2.1925	1.51905	Up	0.998936	NOSTRIN	1	K20126|1|0.0|860|hsa:115677|nostrin	GO:0043232;GO:0016020//membrane;GO:0031410//cytoplasmic vesicle;GO:0043232;GO:0016020//membrane;GO:0031410//cytoplasmic vesicle;GO:0043232;GO:0016020//membrane;GO:0031410//cytoplasmic vesicle;GO:0043232;GO:0016020//membrane;GO:0031410//cytoplasmic vesicle	GO:0005488//binding;GO:0005488//binding;GO:0005488//binding;GO:0005488//binding	GO:0016192//vesicle-mediated transport;GO:0006807//nitrogen compound metabolic process;GO:0032768;GO:0016192//vesicle-mediated transport;GO:0006807//nitrogen compound metabolic process;GO:0032768;GO:0016192//vesicle-mediated transport;GO:0006807//nitrogen compound metabolic process;GO:0032768;GO:0016192//vesicle-mediated transport;GO:0006807//nitrogen compound metabolic process;GO:0032768	gi|284172483|ref|NP_001165103.1|/0/nostrin isoform 3 [Homo sapiens]
2947	4143.36	12.055	34.5675	1.51978	Up	0.99468	GSTM3	1	K00799|1|4e-106|389|hsa:2947|glutathione S-transferase [EC:2.5.1.18]	GO:0044424;GO:0044424	GO:0005515//protein binding;GO:0016765//transferase activity, transferring alkyl or aryl (other than methyl) groups;GO:0005515//protein binding;GO:0016765//transferase activity, transferring alkyl or aryl (other than methyl) groups	GO:0006790//sulfur compound metabolic process;GO:0001885//endothelial cell development;GO:0048545//response to steroid hormone;GO:0006790//sulfur compound metabolic process;GO:0001885//endothelial cell development;GO:0048545//response to steroid hormone	gi|62089218|dbj|BAD93053.1|/1.90401e-132/glutathione S-transferase M3 variant [Homo sapiens]
440915	633	4.53	13.0175	1.52287	Up	0.999135	POTEKP	2	K17299|1|2e-108|320|ptr:739395|POTE ankyrin domain family protein	GO:0044444//cytoplasmic part	GO:0032559//adenyl ribonucleotide binding	-	gi|694896380|ref|XP_009441590.1|/1.13343e-107/PREDICTED: POTE ankyrin domain family member E isoform X1 [Pan troglodytes]
79630	619.25	0.6575	1.9	1.53094	Up	0.997624	C1orf54	1	-	-	-	-	gi|666335589|ref|NP_001287971.1|/1.12468e-33/uncharacterized protein C1orf54 isoform d precursor [Homo sapiens]
100302143	106	4.345	12.6225	1.53857	Up	0.986249	MIR1248	1	-	-	-	-	-
102465906	65	2.745	7.9975	1.54274	Up	0.989054	MIR7112	1	-	-	-	-	-
9301	72	1.81	5.2825	1.54523	Up	0.991864	SNORD27	1	-	-	-	-	-
286006	1549.43	0.685	2.0025	1.54763	Up	0.999147	LSMEM1	2	-	GO:0031224//intrinsic component of membrane;GO:0031224//intrinsic component of membrane	-	-	gi|32699019|ref|NP_872403.1|/1.40259e-50/leucine-rich single-pass membrane protein 1 [Homo sapiens]
5218	5055.43	1.32	3.8725	1.55273	Up	0.999994	CDK14	1	K08821|1|0.0|970|nle:100604351|cyclin-dependent kinase 14 [EC:2.7.11.22]	GO:0043231//intracellular membrane-bounded organelle;GO:0000307//cyclin-dependent protein kinase holoenzyme complex;GO:0044444//cytoplasmic part;GO:0016020//membrane;GO:0043231//intracellular membrane-bounded organelle;GO:0000307//cyclin-dependent protein kinase holoenzyme complex;GO:0044444//cytoplasmic part;GO:0016020//membrane;GO:0043231//intracellular membrane-bounded organelle;GO:0000307//cy…	GO:0004674//protein serine/threonine kinase activity;GO:0005515//protein binding;GO:0032559//adenyl ribonucleotide binding;GO:0004674//protein serine/threonine kinase activity;GO:0005515//protein binding;GO:0032559//adenyl ribonucleotide binding;GO:0004674//protein serine/threonine kinase activity;GO:0005515//protein binding;GO:0032559//adenyl ribonucleotide binding;GO:0004674//protein serine/thr…	GO:0022402//cell cycle process;GO:0030111//regulation of Wnt signaling pathway;GO:0006464//cellular protein modification process;GO:0022402//cell cycle process;GO:0030111//regulation of Wnt signaling pathway;GO:0006464//cellular protein modification process;GO:0022402//cell cycle process;GO:0030111//regulation of Wnt signaling pathway;GO:0006464//cellular protein modification process;GO:0022402//…	gi|560231615|ref|NP_001274064.1|/0/cyclin-dependent kinase 14 isoform a [Homo sapiens]
284254	1914	0.645	1.9	1.55863	Up	1	DYNAP	1	-	GO:0031224//intrinsic component of membrane;GO:0031224//intrinsic component of membrane	-	-	gi|808154174|ref|NP_001294884.1|/9.61749e-59/dynactin-associated protein isoform 2 [Homo sapiens]
6043	135	1.435	4.2275	1.55875	Up	0.99464	SNORA63	1	-	-	-	-	-
29907	1957	0.4525	1.3425	1.56893	Up	0.895716	SNX15	3	K17927|1|2e-92|342|pps:100970178|sorting nexin-15	GO:0012506//vesicle membrane;GO:0044444//cytoplasmic part;GO:0012506//vesicle membrane;GO:0044444//cytoplasmic part	GO:0005543//phospholipid binding;GO:0022892//substrate-specific transporter activity;GO:0005543//phospholipid binding;GO:0022892//substrate-specific transporter activity	GO:0009987//cellular process;GO:0015031//protein transport;GO:0009987//cellular process;GO:0015031//protein transport	gi|119594743|gb|EAW74337.1|/7.35094e-116/hCG23393, isoform CRA_b [Homo sapiens]
8835	2609.85	9.0875	27.095	1.57607	Up	1	SOCS2	1	K04695|1|3e-126|455|chx:102178979|suppressor of cytokine signaling 2	GO:0044424;GO:0044424;GO:0044424;GO:0044424;GO:0044424;GO:0044424	GO:0030674//protein binding, bridging;GO:0005126//cytokine receptor binding;GO:0030674//protein binding, bridging;GO:0005126//cytokine receptor binding;GO:0030674//protein binding, bridging;GO:0005126//cytokine receptor binding;GO:0030674//protein binding, bridging;GO:0005126//cytokine receptor binding;GO:0030674//protein binding, bridging;GO:0005126//cytokine receptor binding;GO:0030674//protein…	GO:0016049//cell growth;GO:0043627//response to estrogen;GO:0007169//transmembrane receptor protein tyrosine kinase signaling pathway;GO:0043066//negative regulation of apoptotic process;GO:0032502//developmental process;GO:0016049//cell growth;GO:0043627//response to estrogen;GO:0007169//transmembrane receptor protein tyrosine kinase signaling pathway;GO:0043066//negative regulation of apoptotic…	gi|431892119|gb|ELK02566.1|/3.18329e-132/Suppressor of cytokine signaling 2 [Pteropus alecto]
29121	5287.21	1.0125	3.02	1.57663	Up	1	CLEC2D	2	K11276|1|8e-106|348|pon:100171958|nucleophosmin 1	GO:0031981//nuclear lumen;GO:0032991//macromolecular complex;GO:0005815//microtubule organizing center;GO:0000922//spindle pole;GO:0031981//nuclear lumen;GO:0032991//macromolecular complex;GO:0005815//microtubule organizing center;GO:0000922//spindle pole;GO:0031981//nuclear lumen;GO:0032991//macromolecular complex;GO:0005815//microtubule organizing center;GO:0000922//spindle pole;GO:0031981//nuc…	GO:0003712//transcription cofactor activity;GO:0043021//ribonucleoprotein complex binding;GO:0046983//protein dimerization activity;GO:0003676//nucleic acid binding;GO:0042802//identical protein binding;GO:0008134//transcription factor binding;GO:0003712//transcription cofactor activity;GO:0043021//ribonucleoprotein complex binding;GO:0046983//protein dimerization activity;GO:0003676//nucleic aci…	GO:0060700//regulation of ribonuclease activity;GO:0006461//protein complex assembly;GO:0007568//aging;GO:0008283//cell proliferation;GO:0051091//positive regulation of sequence-specific DNA binding transcription factor activity;GO:0015031//protein transport;GO:0006259//DNA metabolic process;GO:0050896//response to stimulus;GO:0023052//signaling;GO:0022402//cell cycle process;GO:0032070;GO:001063…	gi|686739659|ref|XP_009245702.1|/7.00596e-120/PREDICTED: C-type lectin domain family 2 member D isoform X1 [Pongo abelii]
84848	786	1.15	3.4525	1.58601	Up	0.996104	MIR503HG	1	-	-	-	-	gi|332247016|ref|XP_003272652.1|/4.58954e-39/PREDICTED: uncharacterized protein LOC100604482 [Nomascus leucogenys]
10142	12460.2	8.435	25.36	1.58809	Up	1	AKAP9	2	K16551|1|0.0|6430|hsa:10142|A-kinase anchor protein 9	GO:0005815//microtubule organizing center;GO:0043231//intracellular membrane-bounded organelle;GO:0005815//microtubule organizing center;GO:0043231//intracellular membrane-bounded organelle	GO:0005515//protein binding;GO:0005515//protein binding	GO:0051234//establishment of localization;GO:0007267//cell-cell signaling;GO:0022402//cell cycle process;GO:0051234//establishment of localization;GO:0007267//cell-cell signaling;GO:0022402//cell cycle process	gi|22538387|ref|NP_005742.4|/0/A-kinase anchor protein 9 isoform 2 [Homo sapiens]
162394	6707.28	6.975	21.0025	1.5903	Up	0.999121	SLFN5	1	K12581|1|4e-20|86.7|nle:100584332|CCR4-NOT transcription complex subunit 7/8;K17985|4|9e-19|100|hsa:55626|activating molecule in BECN1-regulated autophagy protein 1	GO:0043231//intracellular membrane-bounded organelle;GO:0043231//intracellular membrane-bounded organelle	GO:0032559//adenyl ribonucleotide binding;GO:0032559//adenyl ribonucleotide binding	GO:0048869//cellular developmental process;GO:0048869//cellular developmental process	gi|119600565|gb|EAW80159.1|/0/likely ortholog of mouse schlafen 5 [Homo sapiens]
100422875	77	0.3325	1.0025	1.59218	Up	0.860932	MIR3192	1	-	-	-	-	-
3055	2168	0.585	1.7775	1.60334	Up	0.99326	HCK	1	K08893|1|0.0|1125|rro:104653712|hemopoietic cell kinase [EC:2.7.10.2]	GO:0044459;GO:0044444//cytoplasmic part;GO:0044459;GO:0044444//cytoplasmic part;GO:0044459;GO:0044444//cytoplasmic part;GO:0044459;GO:0044444//cytoplasmic part;GO:0044459;GO:0044444//cytoplasmic part;GO:0044459;GO:0044444//cytoplasmic part	GO:0004713//protein tyrosine kinase activity;GO:0032559//adenyl ribonucleotide binding;GO:0004713//protein tyrosine kinase activity;GO:0032559//adenyl ribonucleotide binding;GO:0004713//protein tyrosine kinase activity;GO:0032559//adenyl ribonucleotide binding;GO:0004713//protein tyrosine kinase activity;GO:0032559//adenyl ribonucleotide binding;GO:0004713//protein tyrosine kinase activity;GO:003…	GO:0009888//tissue development;GO:0042742//defense response to bacterium;GO:0006897//endocytosis;GO:0050688//regulation of defense response to virus;GO:0006464//cellular protein modification process;GO:0009888//tissue development;GO:0042742//defense response to bacterium;GO:0006897//endocytosis;GO:0050688//regulation of defense response to virus;GO:0006464//cellular protein modification process;G…	gi|724948171|ref|XP_010351079.1|/0/PREDICTED: tyrosine-protein kinase HCK [Rhinopithecus roxellana]
254778	3471	0.445	1.355	1.60642	Up	0.998542	C8orf46	3	-	-	-	-	gi|294862516|sp|Q5R5R7.3|CH046_PONAB/6.40081e-102/RecName: Full=Uncharacterized protein C8orf46 homolog
100216546	9419	1.405	4.305	1.61544	Up	1	LINC01004	2	K15289|1|3e-10|72.4|ggo:101143670|solute carrier family 35, member F5;K12581|5|2e-08|66.2|nle:100584332|CCR4-NOT transcription complex subunit 7/8	-	-	-	gi|119603755|gb|EAW83349.1|/6.52509e-38/hCG1820606, isoform CRA_b [Homo sapiens]
158763	2742.23	1.4375	4.4175	1.61967	Up	0.99672	ARHGAP36	1	K20315|1|2e-18|97.1|sko:102803527|Rho GTPase-activating protein 21/23;K10360|3|2e-16|90.5|soc:105194477|myosin IX	GO:0044444//cytoplasmic part;GO:0044444//cytoplasmic part;GO:0044444//cytoplasmic part	GO:0008047//enzyme activator activity;GO:0008047//enzyme activator activity;GO:0008047//enzyme activator activity	GO:0009966//regulation of signal transduction;GO:0035556//intracellular signal transduction;GO:0009966//regulation of signal transduction;GO:0035556//intracellular signal transduction;GO:0009966//regulation of signal transduction;GO:0035556//intracellular signal transduction	gi|543413375|ref|NP_001269536.1|/0/rho GTPase-activating protein 36 isoform 2 [Homo sapiens]
646736	935	0.39	1.2	1.62149	Up	0.998965	LOC646736	1	K07994|1|5e-11|70.9|rro:104674670|matrix metalloproteinase-13 (collagenase 3) [EC:3.4.24.-];K18666|2|1e-09|66.2|hsa:51008|activating signal cointegrator complex subunit 1;K09228|3|1e-08|62.8|pon:100938707|KRAB domain-containing zinc finger protein;K06588|5|4e-08|61.2|nle:100592156|integrin beta 5	-	-	-	gi|258679533|ref|NP_001158312.1|/5.35584e-12/LYR motif-containing protein 4 isoform 2 [Homo sapiens]
10734	4263.93	0.4775	1.4775	1.62959	Up	0.999142	STAG3	1	K13055|1|0.0|2011|hsa:10734|cohesin complex subunit SA-3	GO:0043073//germ cell nucleus;GO:0008278//cohesin complex;GO:0000795//synaptonemal complex;GO:0043073//germ cell nucleus;GO:0008278//cohesin complex;GO:0000795//synaptonemal complex;GO:0043073//germ cell nucleus;GO:0008278//cohesin complex;GO:0000795//synaptonemal complex;GO:0043073//germ cell nucleus;GO:0008278//cohesin complex;GO:0000795//synaptonemal complex	-	GO:0007129//synapsis;GO:0007129//synapsis;GO:0007129//synapsis;GO:0007129//synapsis	gi|57863310|ref|NP_036579.2|/0/cohesin subunit SA-3 isoform 1 [Homo sapiens]
3860	1719	16.91	52.35	1.63031	Up	1	KRT13	2	K07604|1|2e-175|617|pps:100977112|type I keratin, acidic	GO:0043234//protein complex;GO:0043234//protein complex	-	GO:0009887//organ morphogenesis;GO:0009628//response to abiotic stimulus;GO:0009888//tissue development;GO:0032526//response to retinoic acid;GO:0009887//organ morphogenesis;GO:0009628//response to abiotic stimulus;GO:0009888//tissue development;GO:0032526//response to retinoic acid	gi|131412225|ref|NP_705694.2|/2.06756e-174/keratin, type I cytoskeletal 13 isoform a [Homo sapiens]
6084	113	0.5125	1.5875	1.63113	Up	0.939773	RNY1	1	-	-	-	-	-
4133	6423.36	0.5025	1.5575	1.63204	Up	0.999382	MAP2	3	K10430|1|0.0|782|aam:106492370|microtubule-associated protein 2	GO:0015630//microtubule cytoskeleton;GO:0015630//microtubule cytoskeleton;GO:0015630//microtubule cytoskeleton;GO:0015630//microtubule cytoskeleton	GO:0005515//protein binding;GO:0002162//dystroglycan binding;GO:0002162//dystroglycan binding;GO:0005515//protein binding	GO:0007019//microtubule depolymerization;GO:0007019//microtubule depolymerization;GO:0007019//microtubule depolymerization;GO:0007019//microtubule depolymerization	gi|62088240|dbj|BAD92567.1|/0/microtubule-associated protein 2 isoform 2 variant [Homo sapiens]
1775	1348.82	1.4175	4.4175	1.63988	Up	0.999087	DNASE1L2	1	K11995|1|1e-144|515|hsa:1775|deoxyribonuclease-1-like protein [EC:3.1.21.-]	-	GO:0046872//metal ion binding;GO:0003676//nucleic acid binding;GO:0004520//endodeoxyribonuclease activity;GO:0046872//metal ion binding;GO:0003676//nucleic acid binding;GO:0004520//endodeoxyribonuclease activity	GO:0006259//DNA metabolic process;GO:0006259//DNA metabolic process	gi|767986978|ref|XP_011520701.1|/1.90203e-159/PREDICTED: deoxyribonuclease-1-like 2 isoform X1 [Homo sapiens]
283554	3908	1.025	3.195	1.64019	Up	1	GPR137C	1	-	GO:0031224//intrinsic component of membrane	-	-	gi|426376916|ref|XP_004055226.1|/0/PREDICTED: integral membrane protein GPR137C [Gorilla gorilla gorilla]
102466724	75	0.335	1.045	1.64127	Up	0.914248	MIR6739	1	-	-	-	-	-
5602	6613.85	0.37	1.155	1.6423	Up	0.99919	MAPK10	3	K04440|1|0.0|917|tup:102475730|c-Jun N-terminal kinase [EC:2.7.11.24]	GO:0031981//nuclear lumen;GO:0044444//cytoplasmic part;GO:0031981//nuclear lumen;GO:0044444//cytoplasmic part;GO:0031981//nuclear lumen;GO:0044444//cytoplasmic part;GO:0031981//nuclear lumen;GO:0044444//cytoplasmic part	GO:0004712//protein serine/threonine/tyrosine kinase activity;GO:0016909//SAP kinase activity;GO:0032559//adenyl ribonucleotide binding;GO:0004712//protein serine/threonine/tyrosine kinase activity;GO:0016909//SAP kinase activity;GO:0032559//adenyl ribonucleotide binding;GO:0004712//protein serine/threonine/tyrosine kinase activity;GO:0016909//SAP kinase activity;GO:0032559//adenyl ribonucleotide…	GO:0006468//protein phosphorylation;GO:0000165//MAPK cascade;GO:0002224//toll-like receptor signaling pathway;GO:0006355//regulation of transcription, DNA-templated;GO:0007166//cell surface receptor signaling pathway;GO:0006468//protein phosphorylation;GO:0000165//MAPK cascade;GO:0002224//toll-like receptor signaling pathway;GO:0006355//regulation of transcription, DNA-templated;GO:0007166//cell …	gi|562827459|ref|XP_006143356.1|/0/PREDICTED: mitogen-activated protein kinase 10 [Tupaia chinensis]
728537	1382	0.3725	1.17	1.6512	Up	0.997485	LINC01125	1	-	-	-	-	gi|982288980|ref|XP_015288720.1|/4.08178e-135/PREDICTED: uncharacterized protein LOC102133559 isoform X1 [Macaca fascicularis]
94161	98	0.4175	1.3125	1.65247	Up	0.975143	SNORD46	2	-	-	-	-	-
378938	8758	25.455	80.05	1.65295	Up	0.995714	MALAT1	3	-	-	-	-	gi|9910794|sp|Q9UHZ2.1|MALAT_HUMAN/3.01308e-21/RecName: Full=Metastasis-associated lung adenocarcinoma transcript 1
85477	3015.77	2.41	7.5875	1.65459	Up	0.999089	SCIN	2	K05768|1|0.0|1428|hsa:85477|gelsolin	GO:0044444//cytoplasmic part;GO:0043232;GO:0044444//cytoplasmic part	GO:0035091//phosphatidylinositol binding;GO:0003779//actin binding;GO:0046872//metal ion binding;GO:0035091//phosphatidylinositol binding;GO:0003779//actin binding;GO:0046872//metal ion binding	GO:0002062//chondrocyte differentiation;GO:0051046//regulation of secretion;GO:0008283//cell proliferation;GO:0006887//exocytosis;GO:0008064//regulation of actin polymerization or depolymerization;GO:0045639//positive regulation of myeloid cell differentiation;GO:0006915//apoptotic process;GO:0071822;GO:0048523//negative regulation of cellular process;GO:0002062//chondrocyte differentiation;GO:00…	gi|22761007|dbj|BAC11416.1|/0/unnamed protein product [Homo sapiens]
100528007	2732	0.535	1.69	1.65941	Up	0.977071	BORCS7-ASMT	1	K07755|1|0.0|766|hsa:57412|arsenite methyltransferase [EC:2.1.1.137]	GO:0043231//intracellular membrane-bounded organelle;GO:0044444//cytoplasmic part	GO:0008757//S-adenosylmethionine-dependent methyltransferase activity	GO:0019748//secondary metabolic process;GO:0006805//xenobiotic metabolic process;GO:0010035//response to inorganic substance	gi|119570054|gb|EAW49669.1|/0/hCG2024404, isoform CRA_e [Homo sapiens]
100847035	57	0.6225	1.9675	1.66022	Up	0.905023	MIR548AR	1	-	-	-	-	-
54453	4300.68	0.8775	2.7775	1.66232	Up	1	RIN2	1	K17638|1|8e-65|252|xtr:100495483|Ras and Rab interactor 1	GO:0044424;GO:0044424	GO:0005088//Ras guanyl-nucleotide exchange factor activity;GO:0008047//enzyme activator activity;GO:0005088//Ras guanyl-nucleotide exchange factor activity;GO:0008047//enzyme activator activity	GO:0035556//intracellular signal transduction;GO:0016192//vesicle-mediated transport;GO:0035556//intracellular signal transduction;GO:0016192//vesicle-mediated transport	gi|336088636|ref|NP_001229510.1|/0/ras and Rab interactor 2 isoform 1 [Homo sapiens]
154761	2579	1.3	4.125	1.66588	Up	1	LOC154761	1	K15259|1|3e-21|106|cmy:102945703|poly [ADP-ribose] polymerase 7/11/12/13 [EC:2.4.2.30]	-	-	-	gi|194386130|dbj|BAG59629.1|/3.44801e-142/unnamed protein product [Homo sapiens]
100316904	841	0.605	1.92	1.6661	Up	0.996881	SAP25	1	K19193|1|1e-146|521|ptr:100615984|histone deacetylase complex subunit SAP25	GO:0043231//intracellular membrane-bounded organelle	GO:0005488//binding	-	gi|578813843|ref|XP_006715885.1|/6.13917e-147/PREDICTED: histone deacetylase complex subunit SAP25 isoform X2 [Homo sapiens]
105375401	533	0.315	1.005	1.67377	Up	0.997126	LOC105375401	1	K04006|1|2e-14|62.8|rro:104664183|decay accelerating factor;K17985|3|4e-13|52.0|hsa:55626|activating molecule in BECN1-regulated autophagy protein 1;K12581|5|2e-10|56.6|nle:100584332|CCR4-NOT transcription complex subunit 7/8	-	-	-	gi|119619464|gb|EAW99058.1|/1.25498e-17/TAK1-binding protein 3, isoform CRA_b [Homo sapiens]
51473	4668.1	11.9225	38.06	1.67459	Up	0.999762	DCDC2	4	K12581|1|2e-20|79.3|nle:100584332|CCR4-NOT transcription complex subunit 7/8;K08805|4|3e-19|100|fch:102046685|doublecortin-like kinase 1/2 [EC:2.7.11.1]	-	-	GO:0048731//system development;GO:0006952//defense response;GO:0016477//cell migration;GO:0007165//signal transduction;GO:0048731//system development;GO:0006952//defense response;GO:0016477//cell migration;GO:0007165//signal transduction	gi|117938307|ref|NP_057440.2|/0/doublecortin domain-containing protein 2 [Homo sapiens]
4886	2974	19.4375	62.2075	1.67825	Up	1	NPY1R	5	K04204|1|0.0|687|rro:104672204|neuropeptide Y receptor type 1	GO:0043005//neuron projection;GO:0016021//integral component of membrane;GO:0030136//clathrin-coated vesicle	GO:0004983//neuropeptide Y receptor activity	GO:0003007//heart morphogenesis;GO:0046883//regulation of hormone secretion;GO:0043627//response to estrogen;GO:0019229//regulation of vasoconstriction;GO:0007610//behavior;GO:0051480//regulation of cytosolic calcium ion concentration;GO:0019318//hexose metabolic process;GO:0007188//adenylate cyclase-modulating G-protein coupled receptor signaling pathway;GO:0007600//sensory perception;GO:0035264…	gi|74136293|ref|NP_001028038.1|/0/neuropeptide Y receptor type 1 [Macaca mulatta]
119385	3155	1.6925	5.4375	1.68379	Up	1	AGAP11	1	K12491|1|0.0|934|nle:100586848|Arf-GAP with GTPase, ANK repeat and PH domain-containing protein 1/3	-	GO:0046914//transition metal ion binding	GO:0032012//regulation of ARF protein signal transduction	gi|148806877|ref|NP_597704.1|/0/arf-GAP with GTPase, ANK repeat and PH domain-containing protein 11 [Homo sapiens]
100529207	3904	0.375	1.205	1.68407	Up	0.995787	RAD51L3-RFFL	1	K10871|1|1e-56|224|pps:100976247|RAD51-like protein 3	-	-	-	gi|119600585|gb|EAW80179.1|/1.83751e-137/hCG2039718, isoform CRA_g [Homo sapiens]
693204	99	1.105	3.625	1.71393	Up	0.997432	MIR619	1	-	-	-	-	-
11099	6215	3.325	10.9575	1.72049	Up	1	PTPN21	3	K18025|1|0.0|2198|hsa:11099|tyrosine-protein phosphatase non-receptor type 14/21 [EC:3.1.3.48]	GO:0043232	GO:0004721//phosphoprotein phosphatase activity	GO:0006464//cellular protein modification process	gi|150418005|ref|NP_008970.2|/0/tyrosine-protein phosphatase non-receptor type 21 [Homo sapiens]
83439	2932	0.935	3.09	1.72457	Up	1	TCF7L1	2	K04490|1|0.0|765|hsa:83439|transcription factor 7-like 1	GO:0043231//intracellular membrane-bounded organelle	GO:0003676//nucleic acid binding;GO:0001071//nucleic acid binding transcription factor activity	GO:0016055//Wnt signaling pathway;GO:0051276//chromosome organization;GO:0006355//regulation of transcription, DNA-templated;GO:0032502//developmental process	gi|13786123|ref|NP_112573.1|/0/transcription factor 7-like 1 [Homo sapiens]
90634	3048.93	0.35	1.1575	1.72559	Up	0.998944	N4BP2L1	1	K15720|1|1e-43|180|gja:107116449|NEDD4-binding protein 2 [EC:3.-.-.-]	-	GO:0032559//adenyl ribonucleotide binding;GO:0032559//adenyl ribonucleotide binding;GO:0032559//adenyl ribonucleotide binding;GO:0032559//adenyl ribonucleotide binding	-	gi|694953710|ref|XP_001143836.3|/1.09523e-116/PREDICTED: NEDD4-binding protein 2-like 1 isoform X1 [Pan troglodytes]
400986	8072	0.7925	2.6275	1.72921	Up	0.998958	ANKRD36C	1	K17299|1|0.0|1617|ptr:470515|POTE ankyrin domain family protein	-	-	-	gi|862669338|ref|NP_001297083.1|/0/ankyrin repeat domain-containing protein 36C [Homo sapiens]
100506885	1876.62	0.835	2.77	1.73004	Up	0.99926	LOC100506885	1	-	-	-	-	gi|119575819|gb|EAW55415.1|/1.56741e-48/hCG2038182, partial [Homo sapiens]
54894	5746	0.43	1.435	1.73864	Up	0.999857	RNF43	5	K15694|1|0.0|1358|hsa:54894|RING finger protein 43 [EC:2.3.2.27]	GO:0012505//endomembrane system;GO:0031090//organelle membrane;GO:0043231//intracellular membrane-bounded organelle;GO:0031224//intrinsic component of membrane;GO:0012505//endomembrane system;GO:0031090//organelle membrane;GO:0043231//intracellular membrane-bounded organelle;GO:0031224//intrinsic component of membrane;GO:0012505//endomembrane system;GO:0031090//organelle membrane;GO:0043231//intr…	GO:0046914//transition metal ion binding;GO:0003824//catalytic activity;GO:0046914//transition metal ion binding;GO:0003824//catalytic activity;GO:0046914//transition metal ion binding;GO:0003824//catalytic activity	-	gi|56711322|ref|NP_060233.3|/0/E3 ubiquitin-protein ligase RNF43 isoform 1 precursor [Homo sapiens]
8869	2355.6	4.2875	14.36	1.74385	Up	0.99617	ST3GAL5	1	K03370|1|0.0|774|hsa:8869|lactosylceramide alpha-2,3-sialyltransferase (sialyltransferase 9) [EC:2.4.99.9]	GO:0016021//integral component of membrane;GO:0031228//intrinsic component of Golgi membrane;GO:0016021//integral component of membrane;GO:0031228//intrinsic component of Golgi membrane	GO:0008373//sialyltransferase activity;GO:0008373//sialyltransferase activity	GO:0001573//ganglioside metabolic process;GO:0006464//cellular protein modification process;GO:0001573//ganglioside metabolic process;GO:0006464//cellular protein modification process	gi|109633046|ref|NP_001035902.1|/0/lactosylceramide alpha-2,3-sialyltransferase isoform 2 [Homo sapiens]
100134938	1360	7.74	25.975	1.74672	Up	1	UPK3BL	2	K17630|1|2e-20|102|fpg:101924060|Ras GTPase-activating protein 4;K17985|2|2e-19|84.7|hsa:55626|activating molecule in BECN1-regulated autophagy protein 1;K15696|4|2e-18|79.7|nle:100581015|RING finger protein 113B	GO:0031224//intrinsic component of membrane	-	-	gi|767948137|ref|XP_011514650.1|/5.78846e-134/PREDICTED: DNA-directed RNA polymerase II subunit RPB11-b2 isoform X8 [Homo sapiens]
106480429	552	1.2375	4.1875	1.75866	Up	0.999045	HLA-DQB1-AS1	1	-	-	-	-	gi|685535969|ref|XP_009203146.1|/1.19321e-07/PREDICTED: uncharacterized protein LOC101013314 [Papio anubis]
102466751	68	0.3125	1.06	1.76214	Up	0.982926	MIR6859-1	1	-	-	-	-	-
102465909	68	0.3125	1.06	1.76214	Up	0.982926	MIR6859-2	1	-	-	-	-	-
102465910	68	0.3125	1.06	1.76214	Up	0.982926	MIR6859-3	1	-	-	-	-	-
103504738	68	0.3125	1.06	1.76214	Up	0.982926	MIR6859-4	1	-	-	-	-	-
132430	4944	0.4425	1.505	1.76601	Up	0.996805	PABPC4L	1	K13126|1|0.0|813|hsa:132430|polyadenylate-binding protein	-	-	-	gi|291084655|ref|NP_001108206.2|/0/polyadenylate-binding protein 4-like [Homo sapiens]
4148	2600	1.6525	5.6275	1.76784	Up	1	MATN3	4	K19467|1|0.0|891|hsa:4148|matrilin-3	GO:0031012//extracellular matrix	GO:0005198//structural molecule activity;GO:0005488//binding	GO:0048731//system development	gi|11321565|ref|NP_002372.1|/0/matrilin-3 precursor [Homo sapiens]
352954	3883.53	3.425	11.6725	1.76894	Up	1	GATS	1	K13055|1|3e-47|116|ptr:463593|cohesin complex subunit SA-3	-	-	-	gi|45708735|gb|AAH33723.1|/3.224e-92/STAG3OS protein, partial [Homo sapiens]
4143	3419	0.3025	1.0325	1.77113	Up	0.99909	MAT1A	2	K00789|1|0.0|768|ggo:101149660|S-adenosylmethionine synthetase [EC:2.5.1.6]	GO:0044444//cytoplasmic part	GO:0046872//metal ion binding;GO:0042802//identical protein binding;GO:0016765//transferase activity, transferring alkyl or aryl (other than methyl) groups;GO:0031406//carboxylic acid binding;GO:0032559//adenyl ribonucleotide binding	GO:0019752//carboxylic acid metabolic process;GO:0009108//coenzyme biosynthetic process;GO:0051260//protein homooligomerization;GO:0006730//one-carbon metabolic process	gi|4557737|ref|NP_000420.1|/0/S-adenosylmethionine synthase isoform type-1 [Homo sapiens]
100506123	717	3.6575	12.585	1.78278	Up	0.999054	LOC100506123	1	-	-	-	-	gi|426336499|ref|XP_004031507.1|/1.90446e-49/PREDICTED: LIM and SH3 domain protein 1-like, partial [Gorilla gorilla gorilla]
8645	3800	0.9075	3.1325	1.78734	Up	0.99931	KCNK5	3	K04916|1|0.0|889|pps:100967788|potassium channel subfamily K member 5	GO:0016021//integral component of membrane	GO:0005261//cation channel activity	GO:0003008;GO:0034220//ion transmembrane transport;GO:0030001//metal ion transport	gi|4504851|ref|NP_003731.1|/0/potassium channel subfamily K member 5 [Homo sapiens]
8660	7014	0.69	2.3875	1.79083	Up	1	IRS2	2	K07187|1|0.0|1740|hsa:8660|insulin receptor substrate 2	GO:0044444//cytoplasmic part;GO:0016020//membrane	GO:0005515//protein binding	GO:0032868//response to insulin;GO:0008284//positive regulation of cell proliferation;GO:0048017//inositol lipid-mediated signaling;GO:0010828//positive regulation of glucose transport;GO:0007169//transmembrane receptor protein tyrosine kinase signaling pathway;GO:0001783//B cell apoptotic process;GO:0005979//regulation of glycogen biosynthetic process;GO:0010746;GO:0043549//regulation of kinase …	gi|38683860|ref|NP_003740.2|/0/insulin receptor substrate 2 [Homo sapiens]
3764	2406	2.085	7.2225	1.79245	Up	0.999174	KCNJ8	3	K05001|1|0.0|745|rro:104660757|potassium inwardly-rectifying channel subfamily J member 8	GO:0043231//intracellular membrane-bounded organelle;GO:0043292//contractile fiber;GO:0005887//integral component of plasma membrane	GO:0005242//inward rectifier potassium channel activity;GO:0032559//adenyl ribonucleotide binding	GO:0043331//response to dsRNA;GO:0009628//response to abiotic stimulus;GO:0071805//potassium ion transmembrane transport;GO:0048513//animal organ development;GO:0002237//response to molecule of bacterial origin;GO:0002252;GO:0050880//regulation of blood vessel size	gi|4826802|ref|NP_004973.1|/0/ATP-sensitive inward rectifier potassium channel 8 [Homo sapiens]
101929613	243.9	0.9425	3.2925	1.80462	Up	0.99787	LOC101929613	1	-	-	-	-	gi|675676843|ref|XP_008960971.1|/4.49085e-65/PREDICTED: uncharacterized protein LOC100967580 [Pan paniscus]
137872	1907	0.3425	1.2	1.80886	Up	0.998927	ADHFE1	2	K11173|1|0.0|870|hsa:137872|hydroxyacid-oxoacid transhydrogenase [EC:1.1.99.24]	GO:0044429	GO:0043169//cation binding;GO:0016614//oxidoreductase activity, acting on CH-OH group of donors	GO:0006818//hydrogen transport;GO:0043648//dicarboxylic acid metabolic process	gi|133922590|ref|NP_653251.2|/0/hydroxyacid-oxoacid transhydrogenase, mitochondrial [Homo sapiens]
64084	4882	1.96	6.8775	1.81103	Up	1	CLSTN2	2	K16506|1|4e-11|73.9|gga:395168|protocadherin Fat 1/2/3;K04600|4|7e-11|73.2|lcm:102357994|cadherin EGF LAG seven-pass G-type receptor 1	GO:0012505//endomembrane system;GO:0031090//organelle membrane;GO:0043231//intracellular membrane-bounded organelle;GO:0031224//intrinsic component of membrane	GO:0046872//metal ion binding	GO:0016337//single organismal cell-cell adhesion	gi|209364544|ref|NP_071414.2|/0/calsyntenin-2 precursor [Homo sapiens]
158046	1227.59	4.775	16.775	1.81274	Up	1	NXNL2	1	K17609|1|2e-85|317|hsa:158046|nucleoredoxin [EC:1.8.1.8]	-	-	-	gi|119583160|gb|EAW62756.1|/2.24597e-119/chromosome 9 open reading frame 121, partial [Homo sapiens]
8330	460	0.2925	1.035	1.82312	Up	0.997159	HIST1H2AK	2	K11251|1|5e-54|211|oaa:100089262|histone H2A	-	-	-	gi|528763464|gb|EPY83123.1|/1.61964e-53/histone H2A type 1-like protein [Camelus ferus]
50636	3271.32	1.435	5.1	1.82945	Up	0.999273	ANO7	3	K19501|1|0.0|1765|hsa:50636|anoctamin-7	GO:0044459;GO:0044444//cytoplasmic part;GO:0034702//ion channel complex;GO:0044459;GO:0044444//cytoplasmic part;GO:0034702//ion channel complex	GO:0005253//anion channel activity;GO:0005253//anion channel activity	GO:0006810//transport;GO:0006810//transport	gi|48717269|ref|NP_001001666.1|/9.17896e-102/anoctamin-7 isoform NGEP-short [Homo sapiens]
4128	5338.98	0.6075	2.1625	1.83174	Up	0.999742	MAOA	3	K00274|1|0.0|1201|mcc:708371|monoamine oxidase [EC:1.4.3.4]	GO:0031224//intrinsic component of membrane;GO:0031966//mitochondrial membrane;GO:0031224//intrinsic component of membrane;GO:0031966//mitochondrial membrane	GO:0005488//binding;GO:0016641//oxidoreductase activity, acting on the CH-NH2 group of donors, oxygen as acceptor;GO:0005488//binding;GO:0016641//oxidoreductase activity, acting on the CH-NH2 group of donors, oxygen as acceptor	GO:0050896//response to stimulus;GO:0042133//neurotransmitter metabolic process;GO:0042417//dopamine metabolic process;GO:0050896//response to stimulus;GO:0042133//neurotransmitter metabolic process;GO:0042417//dopamine metabolic process	gi|795304451|ref|XP_011708741.1|/0/PREDICTED: amine oxidase [flavin-containing] A [Macaca nemestrina]
83478	4644	0.6325	2.2625	1.83878	Up	1	ARHGAP24	2	K07526|1|1e-28|132|tru:101075439|SLIT-ROBO Rho GTPase activating protein	GO:0005924//cell-substrate adherens junction;GO:0043232;GO:0044444//cytoplasmic part;GO:0005924//cell-substrate adherens junction;GO:0043232;GO:0044444//cytoplasmic part;GO:0005924//cell-substrate adherens junction;GO:0043232;GO:0044444//cytoplasmic part;GO:0005924//cell-substrate adherens junction;GO:0043232;GO:0044444//cytoplasmic part;GO:0005924//cell-substrate adherens junction;GO:0043232;GO:…	GO:0008047//enzyme activator activity;GO:0005488//binding;GO:0008047//enzyme activator activity;GO:0005488//binding;GO:0008047//enzyme activator activity;GO:0005488//binding;GO:0008047//enzyme activator activity;GO:0005488//binding;GO:0008047//enzyme activator activity;GO:0005488//binding	GO:0035556//intracellular signal transduction;GO:0032501//multicellular organismal process;GO:0009966//regulation of signal transduction;GO:0048869//cellular developmental process;GO:0035556//intracellular signal transduction;GO:0048646//anatomical structure formation involved in morphogenesis;GO:0032501//multicellular organismal process;GO:0009966//regulation of signal transduction;GO:0048869//c…	gi|568215701|ref|NP_001274734.1|/0/rho GTPase-activating protein 24 isoform 4 [Homo sapiens]
301	1556	3.42	12.24	1.83954	Up	1	ANXA1	2	K17091|1|0.0|682|mcf:102144835|annexin A1	GO:0043231//intracellular membrane-bounded organelle;GO:0005856//cytoskeleton;GO:0042995//cell projection;GO:0044459	GO:0005515//protein binding;GO:0005543//phospholipid binding;GO:0046872//metal ion binding;GO:0004859//phospholipase inhibitor activity	GO:0030217//T cell differentiation;GO:0015909//long-chain fatty acid transport;GO:0008283//cell proliferation;GO:0006906//vesicle fusion;GO:0009913//epidermal cell differentiation;GO:0007165//signal transduction;GO:0006464//cellular protein modification process;GO:0006952//defense response;GO:0043066//negative regulation of apoptotic process	gi|119582950|gb|EAW62546.1|/0/annexin A1, isoform CRA_b [Homo sapiens]
57493	9156	0.545	1.965	1.8502	Up	0.999325	HEG1	1	K17298|1|7e-18|97.4|ola:101165352|mucin-13;K02599|2|3e-15|89.0|mgp:100540801|Notch	GO:0031224//intrinsic component of membrane	GO:0046872//metal ion binding	-	gi|153792110|ref|NP_065784.1|/0/protein HEG homolog 1 precursor [Homo sapiens]
79037	1587	0.905	3.27	1.8533	Up	0.999926	PVRIG	3	K13055|1|1e-106|376|tup:102498657|cohesin complex subunit SA-3	GO:0031224//intrinsic component of membrane	-	-	gi|57863285|ref|NP_076975.2|/3.28928e-171/transmembrane protein PVRIG [Homo sapiens]
57523	7857	0.395	1.4275	1.85357	Up	0.99896	NYNRIN	2	K18668|1|8e-39|166|clv:102091324|ribonuclease ZC3H12 [EC:3.1.-.-]	GO:0031224//intrinsic component of membrane	GO:0003676//nucleic acid binding	GO:0006259//DNA metabolic process	gi|126723547|ref|NP_079357.2|/0/protein NYNRIN [Homo sapiens]
3801	3511.28	0.3675	1.33	1.85561	Up	0.999209	KIFC3	3	K10406|1|0.0|1524|hsa:3801|kinesin family member C2/C3	GO:0005815//microtubule organizing center;GO:0005875//microtubule associated complex;GO:0005913//cell-cell adherens junction;GO:0012506//vesicle membrane;GO:0005815//microtubule organizing center;GO:0005875//microtubule associated complex;GO:0005913//cell-cell adherens junction;GO:0012506//vesicle membrane;GO:0005815//microtubule organizing center;GO:0005875//microtubule associated complex;GO:000…	GO:0003774//motor activity;GO:0032559//adenyl ribonucleotide binding;GO:0003774//motor activity;GO:0032559//adenyl ribonucleotide binding;GO:0003774//motor activity;GO:0032559//adenyl ribonucleotide binding;GO:0003774//motor activity;GO:0032559//adenyl ribonucleotide binding;GO:0003774//motor activity;GO:0032559//adenyl ribonucleotide binding;GO:0003774//motor activity;GO:0032559//adenyl ribonucl…	GO:0016337//single organismal cell-cell adhesion;GO:0045217//cell-cell junction maintenance;GO:0050953//sensory perception of light stimulus;GO:0007017//microtubule-based process;GO:0016337//single organismal cell-cell adhesion;GO:0045217//cell-cell junction maintenance;GO:0050953//sensory perception of light stimulus;GO:0007017//microtubule-based process;GO:0016337//single organismal cell-cell a…	gi|973353098|ref|NP_001305640.1|/0/kinesin-like protein KIFC3 isoform 5 [Homo sapiens]
8367	377	0.71	2.605	1.87539	Up	0.992558	HIST1H4E	3	K11254|1|2e-49|196|pps:100980546|histone H4;K11253|5|3e-40|165|clv:102092620|histone H3	GO:0000785//chromatin;GO:0043231//intracellular membrane-bounded organelle	-	GO:0034728//nucleosome organization	gi|675675656|ref|XP_003804484.2|/1.56774e-48/PREDICTED: LOW QUALITY PROTEIN: uncharacterized protein LOC100980546 [Pan paniscus]
51411	2168	0.2725	1.0025	1.87927	Up	0.997003	BIN2	3	K20119|1|0.0|781|ptr:451903|bridging integrator 2	-	GO:0005488//binding;GO:0005488//binding;GO:0005488//binding;GO:0005488//binding	-	gi|586798140|ref|NP_001276936.1|/0/bridging integrator 2 isoform 2 [Homo sapiens]
3400	3891	3.1975	11.7825	1.88163	Up	0.999999	ID4	3	K17695|1|1e-47|194|lve:103090432|DNA-binding protein inhibitor ID4	GO:0043231//intracellular membrane-bounded organelle	GO:0003712//transcription cofactor activity;GO:0008134//transcription factor binding	GO:0014003//oligodendrocyte development;GO:0006357//regulation of transcription from RNA polymerase II promoter;GO:0045597//positive regulation of cell differentiation;GO:0045686//negative regulation of glial cell differentiation;GO:0008283//cell proliferation;GO:0021543//pallium development;GO:0021953//central nervous system neuron differentiation;GO:0008104//protein localization;GO:0022402//cel…	gi|617641934|ref|XP_007531923.1|/1.13859e-46/PREDICTED: DNA-binding protein inhibitor ID-4 [Erinaceus europaeus]
140733	4752.66	0.6575	2.425	1.88292	Up	1	MACROD2	5	K15212|1|6e-45|186|bfo:BRAFLDRAFT_123909|TATA box-binding protein-associated factor RNA polymerase I subunit A;K15261|2|2e-17|94.7|acs:100555773|poly [ADP-ribose] polymerase 10/14/15 [EC:2.4.2.30]	-	-	-	gi|117968621|ref|NP_542407.2|/0/O-acetyl-ADP-ribose deacetylase MACROD2 isoform 1 [Homo sapiens]
153	2862	0.3175	1.185	1.90006	Up	0.999676	ADRB1	2	K04141|1|0.0|650|hsa:153|adrenergic receptor beta-1	GO:0043231//intracellular membrane-bounded organelle;GO:0016021//integral component of membrane	GO:0031690//adrenergic receptor binding;GO:0043176//amine binding;GO:0046983//protein dimerization activity;GO:0004939//beta-adrenergic receptor activity	GO:0002027//regulation of heart rate;GO:0033555//multicellular organismal response to stress;GO:0010613//positive regulation of cardiac muscle hypertrophy;GO:0001659//temperature homeostasis;GO:0032414//positive regulation of ion transmembrane transporter activity;GO:0046541//saliva secretion;GO:0045762//positive regulation of adenylate cyclase activity;GO:0002021//response to dietary excess;GO:0…	gi|5833815|gb|AAD53696.1|AF169006_1/0/beta-1-adrenergic receptor [Homo sapiens]
9429	4442.94	3.4125	12.7525	1.90188	Up	1	ABCG2	1	K05681|1|0.0|1045|hsa:9429|ATP-binding cassette, subfamily G (WHITE), member 2	GO:0031224//intrinsic component of membrane	GO:0042626//ATPase activity, coupled to transmembrane movement of substances;GO:0042802//identical protein binding;GO:0051184;GO:0032559//adenyl ribonucleotide binding	GO:0051181//cofactor transport;GO:0006875//cellular metal ion homeostasis;GO:0042221//response to chemical;GO:0006082//organic acid metabolic process	gi|383792176|ref|NP_001244315.1|/0/ATP-binding cassette sub-family G member 2 isoform 2 [Homo sapiens]
153769	3043	0.565	2.1175	1.90604	Up	0.999934	SH3RF2	3	K12171|1|0.0|1321|hsa:153769|E3 ubiquitin-protein ligase SH3RF [EC:2.3.2.27]	-	GO:0019903//protein phosphatase binding;GO:0003824//catalytic activity;GO:0046914//transition metal ion binding	-	gi|222446607|ref|NP_689763.3|/0/putative E3 ubiquitin-protein ligase SH3RF2 [Homo sapiens]
10742	2127.63	0.2975	1.12	1.91254	Up	0.99894	RAI2	1	K10627|1|1e-26|124|hgl:101700755|E3 ubiquitin-protein ligase RAD18 [EC:2.3.2.27]	-	-	GO:0007275//multicellular organism development;GO:0007275//multicellular organism development;GO:0007275//multicellular organism development;GO:0007275//multicellular organism development;GO:0007275//multicellular organism development	gi|205371817|sp|Q9Y5P3.2|RAI2_HUMAN/3.14673e-143/RecName: Full=Retinoic acid-induced protein 2
441273	1983	0.655	2.4725	1.9164	Up	0.998974	SPDYE2	3	K08694|1|0.0|765|hsa:441273|speedy	-	-	-	gi|261490710|ref|NP_001026789.2|/0/speedy protein E2 [Homo sapiens]
57520	6949	1.72	6.495	1.91692	Up	0.999991	HECW2	1	K12168|1|0.0|3008|hsa:57520|E3 ubiquitin-protein ligase HECW2 [EC:2.3.2.26]	GO:0044424;GO:0044424	GO:0019787//ubiquitin-like protein transferase activity;GO:0019787//ubiquitin-like protein transferase activity	GO:0016567//protein ubiquitination;GO:0016567//protein ubiquitination	gi|578804638|ref|XP_006712711.1|/0/PREDICTED: E3 ubiquitin-protein ligase HECW2 isoform X2 [Homo sapiens]
100507584	3165	3.27	12.4	1.92298	Up	0.999816	LINC01016	1	-	-	-	-	gi|119602720|gb|EAW82314.1|/2.17195e-16/hCG1990782, partial [Homo sapiens]
5678	1738.4	0.8775	3.345	1.93054	Up	0.999191	PSG9	4	K06500|1|0.0|886|hsa:5678|pregnancy specific beta-1-glycoprotein	-	-	GO:0022414//reproductive process;GO:0022414//reproductive process	gi|683523959|ref|NP_001288638.1|/4.57248e-140/pregnancy-specific beta-1-glycoprotein 9 isoform 4 precursor [Homo sapiens]
100526833	3956	0.8325	3.18	1.9335	Up	0.998487	SEPT5-GP1BB	1	K04557|1|0.0|665|mcf:102119060|septin 5	GO:0032155;GO:0030136//clathrin-coated vesicle;GO:0033267;GO:0032156//septin cytoskeleton;GO:0032432//actin filament bundle;GO:0016020//membrane;GO:0030136//clathrin-coated vesicle;GO:0032156//septin cytoskeleton;GO:0016020//membrane	GO:0000149//SNARE binding;GO:0005543//phospholipid binding;GO:0042802//identical protein binding;GO:0032561//guanyl ribonucleotide binding;GO:0017111//nucleoside-triphosphatase activity;GO:0032561//guanyl ribonucleotide binding	GO:0017157//regulation of exocytosis;GO:0006903//vesicle targeting;GO:0006887//exocytosis;GO:0009207	gi|2978511|gb|AAC39780.1|/0/septin, partial [Homo sapiens]
4256	1406.06	33.4725	127.95	1.93453	Up	1	MGP	2	K19481|1|1e-38|163|rro:104666386|matrix Gla protein	GO:0032991//macromolecular complex;GO:0043231//intracellular membrane-bounded organelle;GO:0031012//extracellular matrix;GO:0032991//macromolecular complex;GO:0043231//intracellular membrane-bounded organelle;GO:0031012//extracellular matrix	GO:0046872//metal ion binding;GO:0005515//protein binding;GO:0005198//structural molecule activity;GO:0046872//metal ion binding;GO:0005515//protein binding;GO:0005198//structural molecule activity	GO:0030323//respiratory tube development;GO:0048869//cellular developmental process;GO:0009888//tissue development;GO:0016337//single organismal cell-cell adhesion;GO:0010038//response to metal ion;GO:0009719;GO:0031667//response to nutrient levels;GO:0001763//morphogenesis of a branching structure;GO:0030278//regulation of ossification;GO:0065003;GO:0030323//respiratory tube development;GO:00488…	gi|13528966|gb|AAH05272.1|/5.3907e-42/Matrix Gla protein [Homo sapiens]
6019	912.57	4.6825	17.9	1.93461	Up	1	RLN2	2	K05255|1|8e-102|372|hsa:6019|relaxin	-	GO:0005102//receptor binding;GO:0005102//receptor binding;GO:0005102//receptor binding	GO:0023052//signaling;GO:0022414//reproductive process;GO:0022414//reproductive process;GO:0022414//reproductive process	gi|20143933|ref|NP_604390.1|/1.17506e-95/prorelaxin H2 isoform 1 preproprotein [Homo sapiens]
102724515	494	19.9575	76.36	1.93589	Up	0.992337	LINC01291	1	-	-	-	-	-
6035	885.29	0.395	1.5175	1.94177	Up	0.993464	RNASE1	4	K01168|1|1e-72|275|hsa:6035|pancreatic ribonuclease [EC:3.1.27.5]	-	GO:0016892//endoribonuclease activity, producing 3'-phosphomonoesters;GO:0005488//binding;GO:0016892//endoribonuclease activity, producing 3'-phosphomonoesters;GO:0005488//binding;GO:0016892//endoribonuclease activity, producing 3'-phosphomonoesters;GO:0005488//binding;GO:0016892//endoribonuclease activity, producing 3'-phosphomonoesters;GO:0005488//binding	-	gi|4506547|ref|NP_002924.1|/9.41544e-72/ribonuclease pancreatic precursor [Homo sapiens]
51090	1514	0.72	2.775	1.94642	Up	0.998927	PLLP	2	-	GO:0031224//intrinsic component of membrane;GO:0043209//myelin sheath	GO:0015075//ion transmembrane transporter activity	GO:0008366//axon ensheathment;GO:0006950//response to stress;GO:0006810//transport	gi|7705755|ref|NP_057077.1|/2.59394e-85/plasmolipin [Homo sapiens]
100526648	102	0.63	2.4525	1.96083	Up	0.995834	MIR1273E	1	K12022|1|2e-08|59.3|rro:104663466|tripartite motif-containing protein 46;K14209|2|4e-07|55.5|rro:104670434|solute carrier family 36 (proton-coupled amino acid transporter);K15289|3|1e-06|53.9|ggo:101143670|solute carrier family 35, member F5;K18047|4|2e-06|53.1|rro:104681215|serine/threonine/tyrosine-interacting-like protein 1;K11787|5|2e-06|53.1|ggo:101143976|phosphoribosylamine--glycine ligase …	-	-	-	gi|119583869|gb|EAW63465.1|/5.48347e-09/hCG1814631 [Homo sapiens]
8418	2452.42	0.7975	3.1075	1.9622	Up	1	CMAHP	2	K08080|1|0.0|996|pps:100978297|CMP-N-acetylneuraminate monooxygenase [EC:1.14.18.2]	GO:0044424;GO:0044424	GO:0043169//cation binding;GO:0016716//oxidoreductase activity, acting on paired donors, with incorporation or reduction of molecular oxygen, another compound as one donor, and incorporation of one atom of oxygen;GO:0051536//iron-sulfur cluster binding;GO:0043169//cation binding;GO:0016716//oxidoreductase activity, acting on paired donors, with incorporation or reduction of molecular oxygen, anot…	GO:0051234//establishment of localization;GO:0006054//N-acetylneuraminate metabolic process;GO:0006091//generation of precursor metabolites and energy;GO:0051234//establishment of localization;GO:0006054//N-acetylneuraminate metabolic process;GO:0006091//generation of precursor metabolites and energy	gi|57526198|ref|NP_001009041.1|/0/cytidine monophosphate-N-acetylneuraminic acid hydroxylase [Pan troglodytes]
5166	3710	0.58	2.27	1.96857	Up	1	PDK4	3	K00898|1|0.0|825|hsa:5166|pyruvate dehydrogenase kinase 2/3/4 [EC:2.7.11.2]	GO:0019866//organelle inner membrane;GO:0044429	GO:0004673//protein histidine kinase activity;GO:0032559//adenyl ribonucleotide binding	GO:0006468//protein phosphorylation;GO:0019318//hexose metabolic process;GO:0006086//acetyl-CoA biosynthetic process from pyruvate	gi|4505693|ref|NP_002603.1|/0/pyruvate dehydrogenase kinase, isozyme 4 [Homo sapiens]
8537	3410.14	22.11	87.1925	1.97951	Up	1	BCAS1	2	K12581|1|5e-27|112|nle:100584332|CCR4-NOT transcription complex subunit 7/8;K11447|3|2e-24|76.3|ptr:449579|histone demethylase [EC:1.14.11.-];K17985|5|5e-22|109|hsa:55626|activating molecule in BECN1-regulated autophagy protein 1	GO:0044424;GO:0044424;GO:0044424	GO:0005488//binding	-	gi|191251777|ref|NP_003648.2|/0/breast carcinoma-amplified sequence 1 isoform 1 [Homo sapiens]
57419	3905	2.9925	11.8975	1.99124	Up	1	SLC24A3	3	K13751|1|0.0|1102|hsa:57419|solute carrier family 24 (sodium/potassium/calcium exchanger), member 3	GO:0031224//intrinsic component of membrane	GO:0015081//sodium ion transmembrane transporter activity;GO:0015291//secondary active transmembrane transporter activity	GO:0070838//divalent metal ion transport;GO:0006875//cellular metal ion homeostasis	gi|31563526|ref|NP_065740.2|/0/sodium/potassium/calcium exchanger 3 precursor [Homo sapiens]
440270	6519	0.7775	3.0975	1.99419	Up	1	GOLGA8B	1	K20358|1|7e-70|269|mcf:102126566|golgin subfamily A member 2	GO:0000139//Golgi membrane;GO:0000139//Golgi membrane	-	-	gi|195947367|ref|NP_001018861.3|/0/golgin subfamily A member 8B [Homo sapiens]
100302137	80	0.31	1.24	2	Up	0.898364	MIR1914	1	-	-	-	-	-
121506	1390.69	1.7975	7.245	2.01099	Up	0.999999	ERP27	1	K20355|1|9e-145|516|hsa:121506|endoplasmic reticulum protein 27	GO:0044432;GO:0044432	-	-	gi|821033436|ref|XP_012357838.1|/1.58194e-94/PREDICTED: endoplasmic reticulum resident protein 27 isoform X2 [Nomascus leucogenys]
389337	4865	0.335	1.3525	2.0134	Up	0.99894	ARHGEF37	2	K12365|1|9e-22|109|chx:102171529|phosphatidylinositol-3,4,5-trisphosphate-dependent Rac exchanger 1 protein	GO:0044424	GO:0005088//Ras guanyl-nucleotide exchange factor activity	GO:0007266//Rho protein signal transduction	gi|767937745|ref|XP_011535944.1|/0/PREDICTED: rho guanine nucleotide exchange factor 37 isoform X2 [Homo sapiens]
114599	146	0.8225	3.3275	2.01635	Up	0.974237	SNORD15B	1	-	-	-	-	-
6013	1019	0.305	1.245	2.02926	Up	0.998944	RLN1	3	K05255|1|2e-92|341|hsa:6013|relaxin	-	GO:0005102//receptor binding	GO:0023052//signaling;GO:0022414//reproductive process	gi|5902052|ref|NP_008842.1|/1.34735e-91/prorelaxin H1 preproprotein [Homo sapiens]
693232	96	0.44	1.805	2.03642	Up	0.993662	MIR647	1	-	-	-	-	-
57639	3333	0.2775	1.1425	2.04163	Up	0.998991	CCDC146	2	K16462|1|5e-21|106|xtr:100495898|centrosomal protein CEP164;K16808|2|3e-19|100|ola:101165245|nuclear mitotic apparatus protein 1;K11498|5|3e-19|100|shr:100931959|centromeric protein E	-	-	-	gi|100814339|ref|NP_065930.2|/0/coiled-coil domain-containing protein 146 [Homo sapiens]
[truncated: 100 more rows]
